## Exit of spore dormancy transforms the yeast cytoplasm and the solubility of its proteome

Samuel Plante<sup>1,2,3,4,5</sup>, Kyung-Mee Moon<sup>6</sup>, Pascale Lemieux<sup>1,2,3,4,5</sup>, Leonard J. Foster<sup>6</sup>, and Christian R. Landry<sup>1,2,3,4,5</sup>

### Affiliations

<sup>1</sup>Institut de Biologie Intégrative et des Systèmes (IBIS), 1030, avenue de la Médecine, Université Laval, Québec (Québec), Canada, G1V 0A6

<sup>2</sup>Regroupement Québécois de Recherche sur la Fonction, l'Ingénierie et les Applications des Protéines, (PROTEO), 1045 Avenue de la Médecine, Université Laval, Québec (Québec), Canada, G1V 0A6

<sup>3</sup>Département de biologie, 1045 Avenue de la Médecine, Université Laval, Québec (Québec), Canada, G1V 0A6.

<sup>4</sup>Département de biochimie, microbiologie et bio-informatique, 1045 Avenue de la Médecine, Université Laval, Québec (Québec), Canada, G1V 0A6.

<sup>5</sup>Centre de recherche en données massives (CRDM), 1065, avenue de la Médecine, Université Laval, Québec (Québec), Canada, G1V 0A6

<sup>6</sup>Department of Biochemistry & Molecular Biology, and Michael Smith Laboratories, University of British Columbia, Vancouver, BC, Canada, V6T 1Z4

### Corresponding author:

Christian R. Landry ([christian.landry@bio.ulaval.ca](mailto:christian.landry@bio.ulaval.ca))  
Pavillon Charles-Eugène-Marchand  
1030, Avenue de la Médecine  
Université Laval  
Québec (Québec) G1V 0A6  
Canada

## **Abstract**

The biophysical properties of the cytoplasm are major determinants of key cellular processes and adaptation. Yeasts produce dormant spores that can withstand extreme conditions. We show that spores exhibit extraordinary biophysical properties, including a highly viscous and acidic cytosol. These conditions alter the solubility of more than 100 proteins such as metabolic enzymes that become more soluble as spores transit to active cell proliferation upon nutrient repletion. A key regulator of this transition is the heat shock protein Hsp42, which shows transient solubilization and phosphorylation, and is essential for the transformation of the cytoplasm during germination. Germinating spores therefore return to growth through the dissolution of protein assemblies, orchestrated in part by Hsp42 activity. The modulation of spores' molecular properties are likely key adaptive features of their exceptional survival capacities.

**Keywords:** cytoplasm, cell dormancy, protein solubility, protein phosphorylation

## Graphical abstract

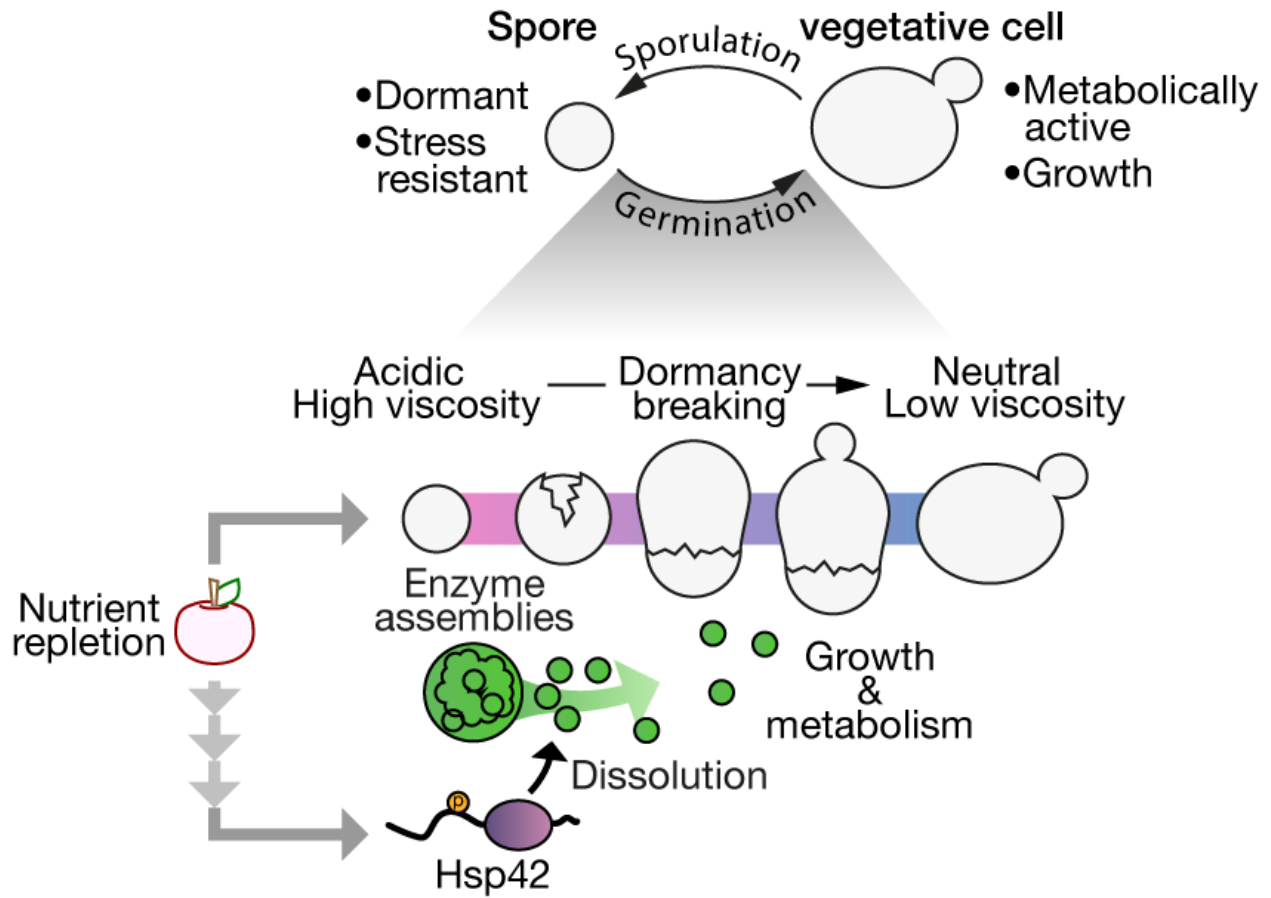

## Highlights

Yeast spores are dormant cells that can withstand extreme environmental conditions

Spore cytoplasm is more dense, viscous and acidic than that of vegetative cells

Hundreds of proteins change solubility during spore activation

Hsp42 plays key role in the biophysical transformation of the spore cytoplasm

## Introduction

Organisms across the tree of life rely on dormancy to withstand hostile conditions. This cellular state implies an arrest of the cell cycle and of cell metabolism, and changes in cell properties that favor survival under unfavorable conditions (Gremer and Sala, 2013; Miller et al., 2021). For instance, nematodes, rotifers and tardigrades produce dormant life-stages that allow them to resist acute stresses such as freezing, desiccation and heat stresses (García-Roger et al., 2019; Guidetti et al., 2011; Vlaar et al., 2021). In flowering plants, the embryo develops as a dormant seed, which contributes to its survival over a long period of time by resisting drought and mechanical stress until it reaches favorable conditions to resume growth (Penfield, 2017). Cell dormancy is also an adaptive strategy in cancer cells, whereby metastatic cells become dormant after dissemination and resume proliferation after treatment has succeeded at eliminating the primary tumours (Phan and Croucher, 2020). As one of the most widespread adaptive survival strategies to extreme conditions, understanding the molecular and cellular bases of cell dormancy is a major goal in cell biology.

Fungal life cycles include the production of spores. Because dormant spores are quiescent and are resistant to numerous extreme conditions such as heat, desiccation (Ho and Miller, 1978) and many harsh ecological conditions such as insect guts (Coluccio et al., 2008), sporulation is thought to be an adaptive strategy to survive changing environmental conditions (Huang and Hull, 2017). Spore stress resistance is largely attributed to the thick cell wall of specific composition (Neiman, 2011), and to the accumulation of protective compounds like trehalose or mannitol (Kane and Roth, 1974; Wyatt et al., 2013). These protective features develop during sporulation, which is typically induced by nutrient stress. When spores are exposed to favorable conditions, germination coordinates the dormancy breaking and the loss of these protective features, with cell-cycle progression and vegetative growth resumption. This transition involves multiple changes in cellular state (Herman and Rine, 1997), including the reactivation of multiple metabolic reactions. Although the precise nutrient stimuli that drive germination is dependent on ecological contexts, a carbon source such as glucose is typically an essential signal (Plante and Landry, 2020a).

Recent studies have shown the potential complex influence of the physical properties and organization of the cytosol in dormancy and stress resistance. Cytosol's viscosity, pH, crowding and protein phase separation have been linked to global cell adaptation across taxonomic groups. For instance, in tardigrades, desiccation resistance is mediated by intrinsically disordered proteins that form vitrified structures (Boothby et al., 2017). Seeds of the plant *Arabidopsis thaliana* sense hydration as the key trigger for

their germination through phase separation of the protein Floe1 (Dorone et al., 2021). This process is a highly responsive environmental sensor since the biophysical state of Floe1 changes within minutes when water content is altered (Penfield, 2021). Examples of the responsiveness of the biophysics of the cell cytoplasm also come from yeast responding to acute stresses. Early heat shock response in yeast includes cytoplasm acidification (Triandafillou et al., 2020), viscosity adaptation (Persson et al., 2020), and protein phase separation (Iserman et al., 2020; Riback et al., 2017; Wallace et al., 2015). Heat shock response induces expression of many heat shock proteins composed mainly of molecular chaperones (Parsell and Lindquist, 1993) which act as a dispersal system for the heat-induced phase-separated protein condensates that promotes the rapid recovery from stress (Yoo et al., 2022).

Given that yeast spores are inherently resistant to stresses that are known to modify many biophysical features of the yeast cytoplasm, we hypothesize that the spore cytoplasm has biophysical properties similar to cells exposed to acute stress and that these will dynamically change during early spore germination. Here, we therefore examine the biophysical properties of dormant yeast spores and the changes that occur during dormancy breaking in spores of the budding yeast to unveil the molecular processes which support this critical life-history cell transition. Our results reveal that dormant spore cytosol is highly viscous and acidic, and that breaking of dormancy is supported by the neutralization and decrease in viscosity of cytoplasm. We used mass spectrometry to examine and perform proteome wide measurements of protein solubility through germination. The measurements of 895 proteins revealed dynamic changes in protein solubility through germination. We uncovered, for instance, the solubilization of several metabolic enzymes during this transition. Our results demonstrate that spores have exceptional biophysical properties and that many of the changes taking place in the cell mimic what occurs in vegetative cells experiencing stress relief. One major similarity is the implication of a small heat shock protein, Hsp42, which is essential for normal spore activation and whose activity is regulated by its phosphorylation.

## Results and discussion

### ***Spores have a dense cytoplasm and display a different ultra architecture that changes during germination***

Spore germination is the transition of dormant spores toward metabolically active and dividing vegetative yeast cells. Spores and vegetative cells differ in terms of morphology and this morphology gradually changes through time. Spores are spherical and highly refractile (Figure 1A), and darken and start growing quickly after the initiation of

germination which can be induced by transferring cells to rich media. The hallmark of the completion of germination and the return to vegetative growth is bud emergence, which occurs at about 6 hours after induction of germination (Figure 1A). Cells' transition from high to low refractility correlates with the decrease in optical density at 595 nm ( $A_{595}$ ) of the pure spore culture (Plante and Landry, 2020b), with the minimal values reached about 3 hours after induction (Figure 1B). One of the adaptive features of spores is their resistance to heat. This feature is lost during germination. The quantification of heat-shock resistance during germination highlights a drastic cellular transition as early as one hour after induction, at which point resistance to thermal stress decreases and reaches levels that compare to that of vegetative cells (Figure 1C). Altogether, these measurements define the time-frame and the major time-points can be used to examine the underlying cellular and molecular changes.

We obtained a more detailed view of the inner cell during germination using transmission electron microscopy (TEM, Figure 1D). Dormant spores are distinguishable by their small size and the thick spore wall absent from vegetative cells. The spore cytoplasm appears darker in TEM in comparison to a vegetative cell, which suggests a denser cytosol (Figure 1D, S1A). Spores have a different cell organization. This is shown by the membranous structures that look highly packed in dormant spores compared to in vegetative cells (Figure 1D). Cells at one and two hours into germination are still indistinguishable from dormant cells. Cell organization changed after about three hours, after heat resistance dropped to levels that compare to that of vegetative cells (Figure 1D). At this time point, there is a rupture of the outer spore wall and the cell starts increasing in size where the spore wall is open. This hatching step is accompanied with a decrease in cytoplasm density and is followed by cell budding. These observations suggest that the spore cytosol organization is timely modulated in the course of germination and return to vegetative growth.

To validate our observations that the density of the cytoplasm decreases during germination, we quantified its viscosity and its dynamic during this process through the examination of macromolecular motion. We expressed the reovirus non-structural protein  $\mu$ NS tagged with GFP as a foreign tracer particle, which has shown to be a suited probe for subcellular environment in yeast (Munder et al., 2016).  $\mu$ NS self-assembles in one or two discrete particles in the yeast cytoplasm that we could detect in both spores and vegetative cells. The tracking of single particles revealed their lower mobility in dormant spores compared to vegetative cells (Figure S2). We calculated a proxy for viscosity from the tracking data of the particles. Because mobility of particles is affected by their size and we observed slight variation in the size of

particles during germination (Figure S1A), we corrected for size effect through the calculation of effective viscosity. These measurements confirmed what was seen in the TEM images: dormant spore cytoplasm is the densest among all of these stages. Its median viscosity is 1,250 mPa\*s and remains constant in the first two hours of germination, then drops gradually from hatching (3 hour time-point) until the end of germination (Figure 1E). At bud emergence, median viscosity (82 mPa\*s) is close to the viscosity measured in vegetative cells (43 mPa\*s). These values for vegetative cells are in line with the broad range of viscosity measured in different eukaryotic cells (from 1 to 50 mPa\*s (Madshus, 1988; Molines et al., 2022)) and highlights that dormant spores have an exceptionally dense and viscous cytosol. These observations are in the same range as spore viscosity of the fungi *Talaromyces macrosporus*, where spores are found to be characterized by high viscosity (Dijksterhuis et al., 2007).

Stress response in yeast includes cytoplasm acidification that culminates with its rigidification (Munder et al., 2016), including during heat shock (Triandafillou et al., 2020). We therefore hypothesized that the high viscosity of the spore cytoplasm and heat shock resistance would be accompanied by a low pH that would increase during germination. To track this property, we constitutively expressed the pH biosensor superfold-pHluorin (Miesenböck et al., 1998), in both vegetative cells and spores after calibrating pHluorin fluorescence *in vivo*. We estimated pH to be around 5.9 in dormant spores, confirming previous reports (Aon et al., 1997; Barton et al., 1980). Over the course of germination, the cytosol is gradually neutralized (Figure 1F). As soon as one hour after exposure to rich media, median intracellular pH raises to 6.2 and it slowly increases until the end of the process ( $\text{pH}_i = 7.3$ ). At this point, intracellular pH gets close to that measured in vegetatively growing cells ( $\text{pH}_i = 7.4$ ).

Altogether, these experiments show that extreme physicochemical conditions prevail in dormant spores compared to vegetative cells, namely a highly viscous and acidic cytoplasm. These conditions are timely modulated during the germination and return to vegetative growth. These intracellular properties that change during germination can play a critical role in cellular function and organization as they are some of the determinants of protein phase separation (Persson et al., 2020). Protein phase separation was shown to underlie heat shock response in yeast and many other forms of stress responses during cell dormancy (Franzmann and Alberti, 2019). We therefore hypothesized that proteins could have a different solubility in spores and that the modification of physicochemical properties during germination affect their behaviour.

### ***Protein solubility changes during germination***



We adopted a physical separation technique similar to the one used in the context of heat shock to measure biochemical changes in protein solubility proteome-wide (Wallace et al., 2015). Protein sedimentation was driven by ultracentrifugation, and protein partitioning between the pellet and supernatant fractions was quantified by liquid-chromatography-coupled tandem mass spectrometry (LC-MS/MS, Figure 1A). We measured the proportion of each protein that partitioned in the pellet fraction using  $P_{\text{index}}$  as a proxy for desolubilization in three biological replicates and at 5 time-points during germination. In total, we detected 24,559 unique peptides corresponding to 2,614 proteins across the experiment. We restricted our analysis to the 895 proteins with at least two unique peptides that were detected at every time-point to measure  $P_{\text{index}}$  (Table S2). Values for these 895 proteins range from 0 to 1, which respectively mean that all of the protein is found in the supernatant and all of the protein is found in the pellet. Proteins with low  $P_{\text{index}}$  are referred to as soluble proteins, while proteins with high  $P_{\text{index}}$  as less soluble ones. Replicated measurements were strongly correlated (Figure S2A).

We examined the properties of proteins that associate with these changes in solubility. Proteins that change solubility are not more or less abundant than other proteins (Figure S2B). Principal component analysis (PCA) revealed that of all the protein properties considered, propensity for condensate formation (PSAP, (van Mierlo et al., 2021)) and score for prion-like domains prediction (PLAAC, (Lancaster et al., 2014)) are the ones that contribute the most to the separation of proteins in terms of  $P_{\text{index}}$  (Figure 2C, S2C). Insolubility does not necessarily reflect phase separation as protein solubility is also influenced by many other factors such as misfolding, formation of protein/RNA granules, or other homogeneous or heterogeneous oligomerization. However, because prion-like domains can contribute to protein phase-separation and tune the dynamics of biomolecular condensate (Holehouse et al., 2021), and because propensity for condensate formation positively correlates with  $P_{\text{index}}$ , high  $P_{\text{index}}$  estimates at least partially reflect phase-separation of proteins and macromolecular assemblies.

Five typical  $P_{\text{index}}$  trajectories were identified using hierarchical clustering (Figure 2B). The two largest clusters contain proteins that remain mostly in the supernatant (soluble proteins,  $n=359$ ) and mostly in the pellet fraction ( $n=425$ ). Together, they account for 87% of total proteins we considered in our analysis. This means that most of the proteins do not exhibit detectable changes in physicochemical partition during germination using our approach. However, some clusters showed dynamic changes across the time frame examined. First, 15 proteins showed a transient solubilization early in germination. These proteins predominantly partitioned in the pellet in dormant spores, while one hour after exposure to rich media, their  $P_{\text{index}}$  dropped drastically

before rising again at the three-hour time-point and remained insoluble until the end of germination. This group includes for instance the translation initiation factor Cdc33 and the GTP-binding protein Ras2. Another group of 17 proteins gradually desolubilize in the course of germination. They start with high solubility (low  $P_{\text{index}}$ ) in dormant spores, and gradually reach higher  $P_{\text{index}}$  value at later time-point in the process. This group includes for instance the transcription elongation factor Spt5 and the vacuolar carboxypeptidase Cps1. Finally, 79 proteins with varying single trajectories gradually gained solubility during germination.

### ***Many classes of proteins change solubility during germination, including metabolic enzymes***

To understand the functional significance of change in  $P_{\text{index}}$ , we searched for gene ontology (GO) terms enrichment in three clusters that display dynamic change using the total protein considered for our analysis as a reference set. In the case of the transient solubilization and gradual desolubilization groups, we found significant enrichment for lipid binding and phosphatidylinositol-3-phosphate (PI3P)-binding proteins, respectively (Figure 3A). Since there is no enrichment of integral membrane proteins, there was likely minimal membrane contamination in the cell extracts. Instead, we suspect that the modulation in solubility we detect in these proteins are a reflection of the gain of activity of many cellular pathways. For instance, gradual insolubility of the SNARE chaperone Sec18, involved in vesicle transport from endoplasmic reticulum to golgi, may reflect increasing vesicle transport required to sustain growth. The larger group of proteins with increasing solubility is enriched for proteins with catalytic activity: precisely, oxidoreduction and protein phosphatase activity (Figure 3A), including for instance the ceramide-activated protein phosphatase Sit4 which functions in the G1/S transition in cell-cycle (Barbosa et al., 2016). This may reflect the reentry of the dormant spores in the cell cycle. Among this group, we also identified the stress related proteins Ola1 and Yef3, which are known to aggregate in response to heat stress (Wallace et al., 2015). The behaviour of these proteins suggest that dormancy in spores shares features with stress response and that germination would correspond to stress relief. Within the group of proteins with increasing solubility, we identified enzymes involved in carbohydrate, lipid and nitrogen metabolisms (Figure 3B). Since nutrient starvation is the key signal that triggers sporulation, the compartment of these metabolic enzymes that solubilize in the course of germination caught our interest. We investigated two of them: the CTP synthase Ura7 and the acetyl-CoA carboxylase Acc1, which are enzymes known to form high molecular weight assemblies in response to nutrient starvation (Narayanaswamy et al., 2009; Petrovska et al., 2014). To validate the solubility changes

revealed by  $P_{\text{index}}$  trajectories, we generated cells expressing either Ura7 or Acc1 tagged - at their genomic locus - with GFP. Both Ura7 and Acc1 formed cytoplasmic foci in dormant spores (Figure 3C). Upon germination, Ura7-GFP and Acc1-GFP fluorescence signals changed until they became mostly diffuse in dividing cells. This behavior confirms the dissolution of the protein assemblies observed in the  $P_{\text{index}}$  trajectories. In addition, we noted the opposite behavior of the glucokinase Glk1. Glk1's  $P_{\text{index}}$  trajectory suggests it gains insolubility during germination. Correspondingly, we found Glk1-GFP to be diffuse in dormant spores, then appears as dense assemblies in cells as soon as one hour after exposure to rich media and until the end of germination. Glk1 was found to polymerize and form filament during the transition from low to high sugar conditions (Stoddard et al., 2020). Its behavior in germinating cells again suggest that spores remain dormant in a starved form and that breaking of dormancy implies changes of enzyme biophysics in response to nutrient repletion.

The reverse order of events between spore germination and heat stress and nutrient stress responses for some key proteins suggest a model in which spores are dormant in a stress response state and germination corresponds to stress relief and return to normal vegetative growth (Figure 3D). Spores therefore most likely borrow strategies from vegetative cells for stress resistance.

### ***The heat shock protein Hsp42 shows dynamic solubilization and phosphorylation during germination***

To further explore the regulatory mechanisms driving cellular reorganization during germination, we searched in our proteomic data for phosphorylation on tyrosines, serines or threonines. We identified 36 phosphoproteins with a unique phosphopeptide in at least one time point during germination (Figure 4A). Given that we did not perform any enrichment for phosphorylation prior to mass spectrometry, the detection of a limited number of phosphorylation was expected. These include for instance the topoisomerase Top1 and the transcription elongation factor Spt5. Out of the 36 phosphoproteins, one is the small oligomeric heat shock protein (sHSP) Hsp42. Since stress response in vegetative cells involves sHSP and they were recently identified as key players in the resolution of molecular assemblies that accompany heat shock (Yoo et al., 2022), we focused on this protein as a potential regulator of protein solubilization in germination.

Hsp42 is part of the protein clusters with changing solubility during germination. Furthermore, the solubility of Hsp42 is correlated with its phosphorylation during this

time-period. Solubility transiently increases while abundance of its phosphorylation transiently increases (Figure 4B). Hsp42 was shown to reversibly assemble in heterogeneous granules in a heat-induced manner, or in quiescent cells in stationary phase (Liu et al., 2012), and to function in tuning granules assembly and disassembly (Grousl et al., 2018). Remarkably, Hsp42-dependent spatial protein organization is crucial for cellular fitness, and lack in foci formation results in a significant delay when recovering from stationary phase (Liu et al., 2012). We hypothesized that the dynamic in Hsp42 localization we observed reflects its function during germination.

To confirm the dynamic assembly and disassembly of Hsp42 during germination, we generated cells expressing Hsp42 fused to GFP. Hsp42 accumulates in cytoplasmic foci in dormant spores, which corroborates its solubility in the proteomics experiments. One hour after the induction of germination, Hsp42 is diffused, which shows the dissolution of the foci (Figure 4D). Diffused localization of Hsp42 is only transient since foci were visible at later time-point during vegetative growth. Microscopic observations therefore validate the  $P_{\text{index}}$  profile of Hsp42, suggesting a transient modification of the protein taking place early in germination.

The search for phosphorylation sites from the proteomics data revealed a dynamic phosphorylation site located in the N-terminal region (NTR) of Hsp42 (S223). Disorder profile of Hsp42 highlights three structurally distinct domains; a central structured domain that is predicted to be an alpha-crystallin domain (ACD) common to sHSP, and a long N-terminal region (NTR) and a short C-terminal region that are both predicted to be highly disordered (Haslbeck et al., 2019). Structure prediction of Hsp42 (Uniprot Q12329) (Jumper et al., 2021) corroborates this architecture; it predicts with high confidence a beta-strand sandwich typical of ACD but predicts large unstructured parts in the N and C-terminal regions (Figure 4E). NTRs are shown to be involved in the regulation and dynamics of chaperone activity of sHSP (Haslbeck et al., 1999, 2019). These proteins are stored in an inactive form as high-order oligomers, and their activation involves phosphorylation, especially in the NTR, that drives disassembly of sHSP into smaller complexes. For instance, several phosphorylation sites on Hsp26 were found to activate chaperone activity by weakening interactions within the oligomers (Mühlhofer et al., 2021). The phosphorylation of S223 on Hsp42 has been previously detected by mass spectrometry. The abundance of this phosphorylation was found to increase in cells following exposure to heat (Kanshin et al., 2015). Hence, we hypothesized that the phosphorylation on S223 of Hsp42 is involved in this sHSP's role during the major cytoplasmic changes that take place during germination.

We first confirmed that Hsp42 plays an important role in thermal stress protection, and if S223 phosphorylation may be regulating this function in vegetative cells (Grousl et al., 2018; Haslbeck et al., 2004). After being subjected to a heat shock, cells lacking Hsp42 (*hsp42Δ::kanMX4*) fail to grow as compared to WT cells, confirming thermal sensitivity (Figure 5A). A phosphomimetic mutant of Hsp42 (S223E) appears to be equally active as the WT chaperon, because expression of either protein tagged with GFP totally restores cellular heat shock resistance (Figure 5A). On the other hand, mutation of the site to a non-phosphorylatable residue (S223A) seems to impede chaperon activation or activity as revealed from the mutant phenotype. Cells expressing the Hsp42 S223A mutant show thermal stress sensitivity (Figure 5A) and this mutant fails to form large cytoplasmic foci as does the protective Hsp42 (Figure 5B). These results suggest that this phosphorylation site could be important during germination. We therefore tested if Hsp42 activity was crucial during germination. Optical density decrease of *hsp42Δ* spores culture exposed to germination conditions is delayed compared to WT spores, suggesting a delay in germination (Figure 5C). In addition, microrheology revealed that *hsp42Δ* spores decrease their viscosity in a delayed fashion compared to WT spores (Figure 5D).

We tested how this delay in biophysical remodeling in *hsp42Δ* spores affected protein organization. In WT spores, Acc1-mCherry is diffusely localized four hours after exposure to rich media. In contrast, in *hsp42Δ* spores, Acc1-mCherry remains condensed as foci (Figure 5E). These results show a role for Hsp42 in disassembly of Acc1 foci. Expression of either WT or a phosphomimetic mutant (S223E) of Hsp42 totally rescues the germination progression in *hsp42Δ* spores (Figure 5C) and restores the disassembly of Acc1 foci (Figure 5F). On the other hand, spores expressing the non-phosphorylatable S223A mutant experienced a delayed germination, and in these cells, Acc1 foci failed to disassemble (Figure 5F). In addition to the role of Hsp42 in facilitating protein dissolution under stress conditions (Grousl et al., 2018) we unveil its function key actor for the solubilization of low solubility proteins such as the acetyl-CoA carboxylase Acc1. Altogether, these findings indicate that the presence and the phosphorylation of Hsp42 on S223 play a critical role in the progression of germination and in the remodeling of the cytoplasm biophysics

## Conclusion

Some dormant cells have exceptional resistance to stress. What are the biophysical conditions that underlie these properties and how cells resume growth after dormancy are important questions across fields of biology. In this work, we used yeast spores to

examine the biophysical properties of a dormant cytosol and its transition between dormancy and its return to vegetative growth. The spore cytosol is acidic and highly viscous, as has been observed in the context of various stresses, for instance in yeast cells during energy depletion (Munder et al., 2016), bacteria during metabolic arrest (Parry et al., 2014), dry plant seed (Buitink and Leprince, 2008), and tardigrades during desiccation (Boothby et al., 2017). The properties observed in yeast spores may therefore represent a conserved adaptive strategy for many cell types and species.

Because of the commonalities with the properties of yeast cells responding to stress, spores' cytosolic properties reflect that spores are in metabolic repression and stress response state. During germination, cells come back to an unstressed state where spore cytosol is neutralized and its viscosity decreased. We also found massive altered protein organization in dormant spores that changes along with the cytosol pH and viscosity during germination. Germination therefore shares many features with stress relief, for instance after heat shock in vegetative cells. One important question these observations trigger is what are the early molecular events that allow the cytosol and the solubility of many proteins to progressively change during germination. We identified Hsp42 as a key actor for the modulation of spore cytosol organization. The role of Hsp42 in dissolution of enzyme assembly during germination extends the role of chaperones in the disassembly of heat-induced protein condensate recently shown (Yoo et al., 2022). The role of heat shock proteins in response to stress in vegetative cells may thus also be critical to the breaking of dormancy of spores, which have intrinsically high stress resistance. The dissolution of insoluble metabolic enzymes during this transition likely reflects the activation of spore metabolism as it modifies its physiology to respond to nutrient, and is an adaptation to nutrient repletion (Petrovska et al., 2014). We identified the phosphorylation of Hsp42 at S223 to be critical for its regulating function in protein organization. This post-translational modification has been reported multiple times in phosphoproteomic analysis (Martínez-Montañés et al., 2020; Swaney et al., 2013), notably in the context of heat shock where cells in unstressed conditions show low levels of Hsp42 phosphorylation while under stress conditions they quickly accumulate phosphorylated Hsp42 (Kanshin et al., 2015). Regarding these observations, the Hsp42 profile we report shows that early in germination spores exhibit stress response, and that while germination progresses, stress response is relieved. The dynamic modulation in phosphorylation of Hsp42 we report implies that prior signaling steps including kinase activity upstream are required for the adaptation of spore cytosol organization to nutrient repletion. Therefore, Hsp42 presumably functions in adapting spore cytosol to nutrient repletion in a similar manner as Floe1 integrates the signal of adequate hydration in *A. thaliana* seed to control germination (Dorone et al., 2021).



Altogether, our results expand our knowledge of the molecular factor taking part in dissolution of protein assemblies, and sheds light into the regulation of protein condensate through signaling. Signaling and kinase activity has been previously linked with protein organization in the context of cellular stress (Wippich et al., 2013). Stress-induced phosphorylation of human Hsp27 was shown to cause its phase separation with FUS, a process that was found to prevent FUS amyloid fibril formation (Liu et al., 2020). Phosphorylation of Hsp42 could imply the mitogen-activated protein (MAP) kinase signaling pathway, which has been reported to be involved in human Hsp27 phosphorylation (Liu et al., 2020). Some kinases in yeast, notably cyclin-dependent kinases Cdc28 and Pho85 or MAP kinases Hog1 and Fus3, have specificities that correspond to the phosphorylation site motif of Hsp42 S223 (Mok et al., 2010). In addition, a target of the MAP kinase Hog1, the transcription elongation factor Spt5 (Silva et al., 2017), does show a similar profile of phosphorylation during germination (YML010W, Figure 4A). Connecting upstream kinases to the activity of Hsp42 will eventually allow to connect nutrient sensing of activating spores and the biophysics of spore cytoplasm.

Cell dormancy is widespread across the three of life and is a survival strategy for many species facing harsh conditions and pathogens (Ortiz et al., 2019) and cancer cells facing drug treatment (Oren, 2022). By discovering what are the early events that regulate the breaking of dormancy, our work will help better understand the molecular basis of adaptation to extreme conditions and potentially help find ways to develop drugs or conditions that can potentiate existing drugs to overcome their exceptional resistance mechanisms.

### **Acknowledgments**

We thank Daniel Evans-Yamamoto, David Bradley and Alexandre K. Dubé for their comments on the manuscript, and Alexandre K. Dubé and Isabelle Gagnon-Arsenault for their support in the laboratory. We are grateful to Pr Martin Bisailon, from Université de Sherbrooke (Canada) for providing us the  $\mu$ NS coding sequence. This work was supported by NSERC Discovery Grants to CRL and LJF, a Canadian Institutes of Health Research (CIHR) Foundation grant (387697) to CRL, and platform funding from Genome Canada (264PRO) to LJF. CRL holds the Canada Research Chair in Cellular Synthetic and Systems Biology.

### **Authors contributions**

Conceptualization: CRL and SP

Methodology and Experiments: SP, KMM, PL, LJF

Validation: SP

Formal analysis: SP, KMM

Writing – original draft preparation: SP, CRL

Writing – review and editing: all authors

Visualization: SP

Supervision: CRL and LJF

Project administration: CRL

Funding acquisition: CRL and LJF

## STAR Methods

### Key resource table

| REAGENT or RESOURCE                                                 | SOURCE                                 | IDENTIFIER      |
|---------------------------------------------------------------------|----------------------------------------|-----------------|
| <b>Chemicals, peptides, and recombinant proteins</b>                |                                        |                 |
| cOmplete, EDTA-free Protease Inhibitor Cocktail                     | MiliporeSigma                          | cat#11836153001 |
| Percoll                                                             | MiliporeSigma                          | cat#P1644       |
| Nigericin                                                           | MiliporeSigma                          | cat#481990      |
| 2-Deoxyglucose                                                      | Bioshop                                | cat#DXG498      |
| Concanavalin A                                                      | MiliporeSigma                          | cat#C2010       |
| <b>Critical commercial assays</b>                                   |                                        |                 |
| BCA Protein Assay Kit                                               | Novagen                                | Cat#71285       |
| <b>Deposited data</b>                                               |                                        |                 |
| Raw and analyzed mass spectrometry data                             | Data are available via ProteomeXchange | PXD035403       |
| <b>Experimental models: <i>Saccharomyces cerevisiae</i> strains</b> |                                        |                 |



|                                                          |                       |          |
|----------------------------------------------------------|-----------------------|----------|
| LL13_054 wild diploid strain MATa/ $\alpha$              | (Leducq et al., 2016) | LL13_054 |
| ura3::PSOD1- $\mu$ NS-GFP hphNT1 (background: LL13_054)  | This Paper            | SPY020   |
| ura3::PSOD1-sfpHluorin hphNT1 (background: LL13_054)     | This Paper            | SPY031   |
| ACC1-GFP::hphNT1 (background: LL13_054)                  | This Paper            | SPY037   |
| URA7-GFP::hphNT1 (background: LL13_054)                  | This Paper            | SPY039   |
| HSP42-GFP::hphNT1 background: LL13_054)                  | This Paper            | SPY040   |
| GLK1-GFP::hphNT1 (background: LL13_054)                  | This Paper            | SPY044   |
| hsp42 $\Delta$ ::KanMX4 (background: LL13_054)           | This Paper            | SPY056   |
| hsp42 $\Delta$ ::HSP42-GFP-hphNT1 (background: LL13_054) | This Paper            | SPY078   |

|                                                                                           |            |        |
|-------------------------------------------------------------------------------------------|------------|--------|
| hsp42Δ::HSP42(S2 23A)-GFP-hphNT1<br>(background:<br>LL13_054)                             | This Paper | SPY080 |
| hsp42Δ::HSP42(S2 23D)-GFP-hphNT1<br>(background:<br>LL13_054)                             | This Paper | SPY081 |
| ACC1-mCherry::nat<br>NT2<br>(background:<br>LL13_054)                                     | This Paper | SPY089 |
| hsp42Δ::KanMX4<br>ACC1-mCherry::nat<br>NT2<br>(background:<br>LL13_054)                   | This Paper | SPY093 |
| hsp42Δ::HSP42-GF<br>P-hphNT1<br>ACC1-mCherry::nat<br>NT2<br>(background:<br>LL13_054)     | This Paper | SPY101 |
| hsp42Δ::HSP42(S2 23A)-GFP-hphNT1<br>ACC1-mCherry::nat<br>NT2<br>(background:<br>LL13_054) | This Paper | SPY102 |
| hsp42Δ::HSP42(S2 23D)-GFP-hphNT1<br>ACC1-mCherry::nat<br>NT2<br>(background:<br>LL13_054) | This Paper | SPY103 |
| <b>Oligonucleotides</b>                                                                   |            |        |

|                                                   |                                |                                                                                                         |
|---------------------------------------------------|--------------------------------|---------------------------------------------------------------------------------------------------------|
| Primers used in this study are listed in table S1 | This study                     | N/A                                                                                                     |
| <b>Recombinant DNA</b>                            |                                |                                                                                                         |
| Plasmid: pYM25                                    | PCR tool box                   | Janke et al., Yeast, 2004                                                                               |
| plasmid: pYM25-PSOD1- $\mu$ N S-yeGFP             | This study                     | N/A                                                                                                     |
| plasmid: pYM25-PSOD1-sfp Hluorin                  | This study                     | N/A                                                                                                     |
| plasmid: pUG6                                     | Euroscarf                      | P30114                                                                                                  |
| plasmid: pNATCRE                                  | (Steensma and Ter Linde, 2001) | pNATCRE                                                                                                 |
| plasmid: pBS35 (mCherry) + natNT2                 | Addgene                        | Cat#83797                                                                                               |
| plasmid: pYM25-HSP42-GFP                          | This study                     | N/A                                                                                                     |
| plasmid: pYM25-HSP42(S22 3A)-GFP                  | This study                     | N/A                                                                                                     |
| plasmid: pYM25-HSP42(S22 3D)-GFP                  | This study                     | N/A                                                                                                     |
| <b>Software and algorithms</b>                    |                                |                                                                                                         |
| Rstudio                                           | Rstudio                        | RRID: SCR_000432 ( <a href="https://www.rstudio.com/">https://www.rstudio.com/</a> )                    |
| Python (v 3.7.4)                                  | Python                         | <a href="https://www.python.org/">https://www.python.org/</a>                                           |
| GrowthCurver (v 0.3.1)                            | (Sprouffske and Wagner, 2016)  | <a href="https://github.com/sprouffske/growthcurver">https://github.com/sprouffske/growthcurver</a>     |
| TrackPy (v 0.5.0)                                 | (Crocker and Grier, 1996)      | <a href="http://soft-matter.github.io/trackpy/v0.5.0/">http://soft-matter.github.io/trackpy/v0.5.0/</a> |
| Matplotlib (v 3.5.1)                              | (Hunter, 2007)                 | <a href="https://matplotlib.org/">https://matplotlib.org/</a>                                           |

|                                                 |                           |                                                                                                                                                   |
|-------------------------------------------------|---------------------------|---------------------------------------------------------------------------------------------------------------------------------------------------|
| Seaborn                                         | (Waskom, 2021)            | <a href="https://seaborn.pydata.org/index.html">https://seaborn.pydata.org/index.html</a>                                                         |
| Prion-Like Amino Acid Composition (PLAAC)       | (Lancaster et al., 2014)  | <a href="http://plaac.wi.mit.edu">http://plaac.wi.mit.edu</a>                                                                                     |
| scipy.cluster.hierarchy (v1.8.1)                | Scipy                     | <a href="https://docs.scipy.org/doc/scipy/reference/cluster.hierarchy.html">https://docs.scipy.org/doc/scipy/reference/cluster.hierarchy.html</a> |
| Metapredict (v2.0)                              | (Emenecker et al., 2021)  | <a href="https://github.com/idptools/metapredict">https://github.com/idptools/metapredict</a>                                                     |
| Phase Separation Analysis and Prediction (PSAP) | (van Mierlo et al., 2021) | <a href="https://github.com/Guido497/phase-separation">https://github.com/Guido497/phase-separation</a> .                                         |
| Scikit-learn (sklearn) v1.1.1                   | (Pedregosa et al., 2011)  | <a href="https://scikit-learn.org/">https://scikit-learn.org/</a>                                                                                 |

## Method details

### Yeast strains construction and culture conditions

The yeast strains used in this study are listed in the Key resources table. Background for every construction is the wild diploid *Saccharomyces cerevisiae* LL13\_054 (Leducq et al., 2016). This strain was chosen for its propensity to sporulate at high efficiency. For C-terminal labeling of Acc1, Ura7, Glk1 and Hsp42 with GFP at their native genomic locus (Figure 3C, 4D), GFP and Hyg resistance marker (hphNT2) were amplified from pYM25 with flanking DNA for genomic integration. For deletion of *HSP42* (Figure 5, *hsp42* $\Delta$ ) the cassette loxP-pAgTEF1-kanMX-tAgTEF1-loxP from pUG6 was amplified with the flanking DNA for replacement of the HSP42 coding sequence, leaving its promoter and terminator intact. The deletion cassette was removed by expressing the recombinase Cre on the plasmid pNatCRE. Site-directed mutagenesis on Hsp42 (S223A or S223E) was conducted by primer extension. For restoration of Hsp42 expression in *hsp42* $\Delta$  cells (Figure 5A, B, C, F), WT or mutant HSP42 coding sequences (excluding stop codon) were cloned in pYM25 upstream and in frame with GFP using Gibson assembly. HSP42(WT or mutant)-GFP-hphNT2 was amplified with flanking DNA for integration designed to introduce HSP42-GFP downstream of HSP42 promoter at its native genomic locus in the *hsp42* $\Delta$  strain. For C-terminal labelling of Acc1 with mCherry at its native genomic locus (Figure 5E, F) mCherry-natNT2 was amplified from pBS35 + natNT2 plasmid with adequate flanking sequence for integration. Primer used for strains construction are listed in table S1. At each step, diploid cells were sporulated, and haploid spores were dissected on selection media

and further sequencing and microscopic analysis confirmed integration. Culture from confirmed spores gave rise to homozygous diploid cells as these are homothallic spores. Competent cells were prepared and transformations performed using standard protocols (Amberg et al., 2005). Yeast were grown in YPD medium containing 1% yeast extract (Bioshop), 2% peptone (Bioshop), and 2% glucose (Bioshop) with the appropriate antibiotic selection.

#### Sporulation and germination

Sporulation was conducted on sporulation medium plates containing 1% potassium acetate, 0.1% yeast extract, 0.01% glucose, and 2% agar and spores were further purified on Percoll gradient (Sigma) as previously described (Plante and Landry, 2020b). Germination was induced by transferring spores to YPD. To monitor germination, fresh spores were diluted in YPD at an  $OD_{600} = 1$  and optical density was measured periodically in an Infinite M Nano plate reader (Tecan) set at 30°C.

#### Heat shock resistance assay

Resistance measurements in spores during germination (Figure 1B) were conducted as described previously (Plante and Landry, 2020b). Briefly, freshly purified wild spores were induced in germination in YPD medium, and at the indicated time following induction cells were sampled. Half of the cells were diluted in YPD medium, and the other half was treated at 55°C for 10 minutes in a thermocycler (Eppendorf Mastercycler ProS) before being transferred to YPD. Growth curves of both treated and untreated cells were recorded in an Infinite M Nano plate reader (Tecan) set at 30°C without shaking. Area under the curve (AUC) was determined using the Growthcurver package in R (Sprouffske and Wagner, 2016). Heat resistance value was defined as the ratio of AUC of treated growth curve to AUC of untreated growth curve both obtained over the time required for untreated spore ODs to reach stationary phase. For resistance measurement of vegetative cells (Figure 5A), cells were grown overnight in YPD and diluted in YPD at  $OD_{600}$  of 0.1 and grown at 30°C until they reached an  $OD_{600}$  of 0.4 - 0.5. Equal amounts of cell were diluted in fresh YPD medium, or incubated at 50°C for 10 minutes in a thermocycler prior to dilution. Growth curves of treated and control cells were recorded in a plate reader set at 30°C.

#### Phase contrast and fluorescence cell imaging

All microscopic imaging experiments were performed using eight-well glass-bottom chamber slides (Sarstedt) coated with 0.05 mg/ml concanavalin A (Millipore Sigma). For phase contrast observation of germination (Figure 1C), freshly prepared spores were induced in germination by transferring them in a chamber filled with YPD medium. Cell

imaging was performed on an Apotome Observer Z1 microscope (Zeiss) equipped with LD PInN 40x/0.6 objective (Zeiss) at the indicated time after induction in a single field. For fluorescence observation during germination, freshly prepared spores were diluted in YPD medium and incubated at 30 °C. At the indicated time after exposure to germination conditions, spores were washed in water, and transferred in a chamber filled with SC medium containing 0.174% Yeast nitrogen base (BioShop), 2% glucose and 0.5% ammonium sulfate (BioShop). For fluorescence observation on vegetative cells (Figure 5B), cells were grown in YPD at 30 °C until they reached an OD<sub>600</sub> of 0.4 - 0.5. Cells were left untreated (Control) or subjected to a heat shock at 50 °C for 10 minutes in a thermocycler. They were then washed in water and transferred in a chamber filled with SD medium. Fluorescence imaging was performed on an Apotome microscope equipped with a Plan-Apochromate 100x/1.4 oil objective (Zeiss). Image acquisition was performed using an AxioCam MRm camera (Zeiss). Images were analysed using the ImageJ software (Schneider et al., 2012).

#### Transmission Electron microscopy

Freshly prepared spores were induced in germination in YDP at 30 °C. At the indicated time after the induction of germination, cells were harvested, washed in water and suspended in fixative solution, containing 2.5% glutaraldehyde, 1.5% paraformaldehyde, 0.5mM CaCl<sub>2</sub> in 0.1M cac buffer pH 7.2. Vegetatively growing cells in YPD (OD<sub>600</sub> = 0.5-0.6) were harvested, washed in water and suspended in fixative solution. Cells were fixed for 24 hours at room temperature. Following steps were conducted by the microscopy platform of IBIS (Université Laval, Québec, Canada). Cells were dehydrated with ethanol solution (30-100%), then embedded in epoxy resin (Epon). 150 nm–thick sections of resin-embedded cells were prepared using an ultramicrotome (Ultracut UCT; Leica), and stained with 1% (wt/vol) uranyl acetate in 70% (wt/vol) methanol for 5 min and 0.4% lead citrate for 3 min. Samples were imaged on a JEM 1230 Transmission Electron Microscope (JOEL). Images were analysed and processed using ImageJ software.

#### Molecular probes

The complete sequence of mammalian orthoreovirus 3 strain T3 non structural protein  $\mu$ NS (GeneBank MK246417.1) was kindly shared by Pr. Martin Bisailon from Université de Sherbrooke. We cloned by gibbon assembly the whole coding sequence, minus stop codon, into pYM25 (Janke et al., 2004) to generate a fusion with yeGFP at its C-terminus. The promoter of *SOD1* (nucleotides -851 to -1 relative to ATG) was cloned by Gibson assembly upstream the  $\mu$ NS CDS in pYM25. Expression of *SOD1* was shown in spores and during germination (Plante et al., 2017), and expression of the

molecular probe with this promoter happened at a high level in spores and during germination which suited our experiments with this cell type. *SOD1* promoter -  $\mu$ NS - GFP in addition to HPH markers on pYM25 were amplified as a whole with the appropriate flanking sequences for genomic integration at the *URA3* locus. From all tested loci for integration (*MET15*, *LEU2*, *HIS3*), *URA3* allows high and uniform expression of the probes across the population, while having the least effect on sporulation and germination efficiency.

Plasmid p426MET25 containing sfpHluorin gene was purchased from Addgene (ID 115697). We swapped the yeGFP gene in pYM25 plasmid for sfpHluorin, and cloned the *SOD1* promoter upstream the sfpHluorin CDS by Gibson assembly. The *SOD1* promoter - sfpHluorin in addition to HPH marker on pYM25 were amplified as a whole with the appropriate flanking sequences for genomic integration at the *URA3* locus. Yeast with either genomic integration were selected for hygromycin resistance.

#### Particle tracking and microrheology

Cells expressing  $\mu$ NS-GFP were transferred to a 8-well glass-bottom chamber slides (Sarstedt) coated with concanavalin A 0.05 mg/mL (Millipore Sigma) and filled with 500 $\mu$ l of complete SC medium. Image acquisition was performed using a Perkin Elmer UltraVIEW confocal spinning disk unit attached to a Nikon Eclipse TE2000-U inverted microscope equipped with a Plan Apochromat DIC H 100 $\times$ /1.4 oil objective (Nikon), and a Hamamatsu Orca Flash 4.0 LT + camera. Imaging was done at 30 °C in an environmental chamber. The software NIS-Elements (Nikon) was used for image capture. For each field, one brightfield and a series of fluorescence (GFP) images were taken. Cells were excited with a 488 nm laser and emission was filtered with a 530/630 nm filter. GFP time lapse images were acquired continuously at a rate of two frames/sec for one min. Images were processed using image J. Particle tracking was performed using the python package Trackpy ((Crocker and Grier, 1996), <http://soft-matter.github.io/trackpy/v0.5.0/>). Particles were identified in microscopic images using the “locate” function. Minimal mass threshold was set at 200 to exclude spurious fluorescence signals. Trajectories were assembled from the multiple frames using the “link” function. The “imsd” function was used to compute mean squared displacement of individual particles. Microns per pixel was set as 10/75 and frames per second = 2. From the Stokes-Einstein relation (Figure 1E) we computed the effective viscosity ( $\eta$ ) as:

$$\eta = \frac{\kappa_B T}{6\pi D r}$$

where  $\kappa_B$  is the Boltzmann constant, T is the temperature (303 K), D is the displacement constant obtained from MSD of a given particle and r is the radius that particle.

#### Intracellular pH measurements

Exponentially growing wild type cells expressing sfpHluorin (OD = 0.3-0.4) in YPD medium were used for calibration curve determination as previously described (Triandafillou and Drummond, 2020). Cells were washed twice in water and suspended in calibration buffer containing 50 mM NaCl, 50 mM KCl, 50 mM MES, 50 mM HEPES, 100 mM ammonium acetate, 10 mM 2- deoxyglucose and 10  $\mu$ M nigericin; pH was adjusted with HCl or KOH from 5.0 to 9.0. After 30 minutes incubation at room temperature, fluorescence (533 nm) of sfpHluorin following excitation at 405 and 488 nm was acquired using a Guava EasyCyte HT cytometer (EMD Millipore). The calibration curve was generated by taking the median ratio of fluorescence after excitation at 405 nm to excitation at 488 nm (405/488 ratio) at various pH. Ratios were corrected for background by subtracting the autofluorescence of unlabeled cells (WT). Points were fitted to a sigmoid (Figure S1D). pH measurement was performed on vegetatively growing cells (OD=0.3-0.4) expressing sfpHluorin in YPD and freshly prepared spores expressing sfpHluorin at the indicated time-points after exposure to rich medium. Cells were washed twice in water then suspended in a measurement buffer containing 50 mM NaCl, 50 mM KCl, 50 mM MES, 50 mM HEPES, 100 mM ammonium acetate. After 30 minutes of incubation at room temperature, the median 405/488 ratio was measured by cytometry. pH values were obtained from the sigmoid function of the calibration curve.

#### Protein extraction and sedimentation.

Freshly purified wild spores at the indicated time following germination induction in YPD medium, and vegetatively growing cells in YPD (OD = 0.5-0.6) were harvested. Cell were resuspended in 4 ml Protein buffer containing 120 mM KCl, 2 mM EDTA, 20 mM HEPES-KOH, pH 7.4, 1:500 Protease inhibitor (MiliporeSigma), 0.5 mM DTT and 1mM PMSF, and snap frozen as 20  $\mu$ L beads, then placed in a 10 ml milling pod (Retsch) cooled in liquid nitrogen along with a 10 mm milling bead. 20 milling cycles of 2 minutes each each were performed on a Mixer Mill MM 400 (Retsch) at 30 Hz, with cooling in liquid nitrogen between each cycle. Cell extracts were thawed on ice, and clarified by centrifugation at 16,000 g for 10 minutes. Supernatant was retrieved and protein concentration was measured by BCA protein assay (Novagen, (Smith et al., 1985). Protein concentrations were adjusted in all the samples to 800  $\mu$ g/ml. Equal volume (2 ml *i.e* 1600  $\mu$ g) of cell extracts were loaded in ultracentrifuge tubes (Beckman). Samples were ultracentrifuged at 100,000 g for 30 minutes at 4°C in a Optima XPN-100



ultracentrifuge (Beckman). Supernatants were kept aside as “Supernatant” fraction. Pellets were washed twice with protein buffer, then resuspended in protein buffer + 1% SDS which correspond to “Pellet” fraction. 1% of total supernatant (i.e. 20  $\mu$ l) and pellet fraction (i.e. 10  $\mu$ l) for each cell extract was loaded on a 10% SDS-polyacrylamide gel in a loading buffer containing 0.06M Tris pH 6.8, 0.07M SDS, 10% glycerol, 5% 2-mercaptoethanol and 0.01% bromophenol blue. Migration was conducted at 90 V until dye front reached 1 cm into the gel. Proteins were stained with Coomassie G-250 dye, and lanes were cut out of the gel and stored in 1.5 ml microtubes before they are further processed.

### Mass spectrometry

In gel protein digestion was performed as previously described (Shevchenko et al., 1996). Gel lanes of each sample were cut into smaller pieces, destained with 40% ethanol in 30 mM ammonium bicarbonate then reduced with 10 mM DTT at 37°C for 30 min then alkylated with 55 mM iodoacetamide at 37°C for 30 min. The gel pieces were digested at 37°C initially with 0.5  $\mu$ g of trypsin (Promega) per sample for 6 hours then additionally with 0.3  $\mu$ g of trypsin overnight. The resulting peptides were extracted from gel pieces using sequential shaking in 40% acetonitrile then 100% acetonitrile, vacuum centrifuged (Vacufuge, Eppendorf) to evaporate the organic solvents and cleaned through C18 STop-And-Go-Extraction tips (StageTips, PMID 12498253), eluted in 40% acetonitrile, 0.1% formic acid, and vacuum centrifuged until complete dryness. LC-MSMS analysis (Kerr et al., 2020). The concentration of the final reconstituted sample was measured at  $A_{205}$  using a NanoDrop One (Thermo Fisher) to inject 250 ng into Bruker Impact II Qtof coupled to easy nLC 1200 (Kerr et al., 2020). The injection was randomized to minimize loading order bias. A single analytical column set up using IonOpticks’ Aurora UHPLC column (1.6  $\mu$ m C18 and 25 cm long) was used to create 90 minutes of separation from 5% to 35% buffer B for each sample.

### Data search.

Resulting data were searched on MaxQuant version 1.6.17.0 (Cox et al., 2009) against sequences from verified and uncharacterized ORFs from the R64-3-1 release of the S288C genome proteome database (yeastgenome.org) and common contaminant sequences provided by the software (246 sequences) adding the following variable modifications: oxidation on methionines, acetylation on protein N-termini, acetylation on lysines, methylations on arginine, and phosphorylation on serines, threonines, and tyrosines. Fixed carbamidomethylation was set on cysteines. Default match between runs was enabled and default peptide and fragment mass tolerances (10 and 40 ppm) were set. Data were filtered to have 1% false discovery rates at peptide and protein

levels. The mass spectrometry proteomics data have been deposited to the ProteomeXchange Consortium via the PRIDE (Perez-Riverol et al., 2022) partner repository with the dataset identifier PXD035403.

### Proteomic analysis

For the analysis of protein solubility (Pindex measurements) we considered the intensity-based absolute quantification (iBAQ, (Schwanhäusser et al., 2011)) of proteins with sequence coverage of  $\geq 10\%$  with at least 2 peptides. 895 proteins, for which total abundance (Supernatant + pellet) was  $> 0$  in each replicate at every time-points of germination, were included in the analysis. Pindex of a given protein was measured as the ratio of its abundance in the pellet to its total abundance (Supernatant + Pellet). Since Pindex values across the triplicates were highly correlated (Figure S2A), we considered the mean Pindex of each triplicate. Pindex values of the 895 proteins considered at each time-point in germination are listed in Table S2. Clustering of Pindex trajectories was performed in python using the Hierarchical clustering method in the Scipy package (`scipy.cluster.hierarchy`). Hierarchical linkage was conducted with the linkage function using the “complete” method. The clusters were then defined using the `fcluster` function using the “distance” criterion for discrimination.

### Protein properties

Molecular weight and isoelectric point of the 895 considered proteins were retrieved on web-based YeastMine application (<https://yeastmine.yeastgenome.org/>). Total iBAQ (Supernatant + Pellet) for each of the 895 proteins in the analysis was average amongst the five time-points to obtain the mean abundance. To measure, in the considered proteins, the amino acid composition predicted to form prion-like domain, we used the Prion-like amino acid composition (PLAAC) web-based application (<http://plaac.wi.mit.edu/details>, (Lancaster et al., 2014)). From this application, we considered the normalized score (NLLR) of each protein for our analysis. To predict the propensity of each of the proteins to condensate, we used the python application PSAP ((van Mierlo et al., 2021), <https://github.com/Guido497/phase-separation>). This classifier scores each residue, and we used the median score of each protein for further analysis. To predict the consensus disorder of each protein, we used the python application Metapredict ((Emenecker et al., 2021), <https://github.com/idptools/metapredict>) which is a neural network trained for single residue scoring. For further analysis, we used the median metapredict score for each protein. Principal component analysis (PCA) was performed using the Scikit-learn package in python. Protein properties data were first scaled using the `StandardScaler` function, then PCA was performed with `PCA` function.

## References

- Amberg, D.C., Burke, D., and Strathern, J.N. (2005). *Methods in Yeast Genetics: A Cold Spring Harbor Laboratory Course Manual* (CSHL Press).
- Aon, J.C., Aon, M.A., Spencer, J.F., and Cortassa, S. (1997). Modulation of sporulation and metabolic fluxes in *Saccharomyces cerevisiae* by 2 deoxy glucose. *Antonie Van Leeuwenhoek* **72**, 283–290. .
- Barbosa, A.D., Pereira, C., Osório, H., Moradas-Ferreira, P., and Costa, V. (2016). The ceramide-activated protein phosphatase Sit4p controls lifespan, mitochondrial function and cell cycle progression by regulating hexokinase 2 phosphorylation. *Cell Cycle* **15**, 1620–1630. .
- Barton, J.K., den Hollander, J.A., Lee, T.M., MacLaughlin, A., and Shulman, R.G. (1980). Measurement of the internal pH of yeast spores by <sup>31</sup>P nuclear magnetic resonance. *Proc. Natl. Acad. Sci. U. S. A.* **77**, 2470–2473. .
- Boothby, T.C., Tapia, H., Brozena, A.H., Piskiewicz, S., Smith, A.E., Giovannini, I., Rebecchi, L., Pielak, G.J., Koshland, D., and Goldstein, B. (2017). Tardigrades Use Intrinsically Disordered Proteins to Survive Desiccation. *Mol. Cell* **65**, 975–984.e5. .
- Buitink, J., and Leprince, O. (2008). Intracellular glasses and seed survival in the dry state. *C. R. Biol.* **331**, 788–795. .
- Coluccio, A.E., Rodriguez, R.K., Kernan, M.J., and Neiman, A.M. (2008). The yeast spore wall enables spores to survive passage through the digestive tract of *Drosophila*. *PLoS One* **3**, e2873. .
- Cox, J., Matic, I., Hilger, M., Nagaraj, N., Selbach, M., Olsen, J.V., and Mann, M. (2009). A practical guide to the MaxQuant computational platform for SILAC-based quantitative proteomics. *Nat. Protoc.* **4**, 698–705. .
- Crocker, J.C., and Grier, D.G. (1996). Methods of Digital Video Microscopy for Colloidal Studies. *J. Colloid Interface Sci.* **179**, 298–310. .
- Dijksterhuis, J., Nijssse, J., Hoekstra, F.A., and Golovina, E.A. (2007). High viscosity and anisotropy characterize the cytoplasm of fungal dormant stress-resistant spores. *Eukaryot. Cell* **6**, 157–170. .
- Dorone, Y., Boeynaems, S., Flores, E., Jin, B., Hateley, S., Bossi, F., Lazarus, E., Pennington, J.G., Michiels, E., De Decker, M., et al. (2021). A prion-like protein regulator of seed germination undergoes hydration-dependent phase separation. *Cell* **184**, 4284–4298.e27. .
- Emenecker, R.J., Griffith, D., and Holehouse, A.S. (2021). Metapredict: a fast, accurate, and easy-to-use predictor of consensus disorder and structure. *Biophys. J.* **120**, 4312–4319. .
- Franzmann, T.M., and Alberti, S. (2019). Protein Phase Separation as a Stress Survival Strategy. *Cold Spring Harb. Perspect. Biol.* **11**. <https://doi.org/10.1101/cshperspect.a034058>.
- García-Roger, E.M., Lubzens, E., Fontaneto, D., and Serra, M. (2019). Facing Adversity:

Dormant Embryos in Rotifers. *Biol. Bull.* 237, 119–144. .

Gremer, J.R., and Sala, A. (2013). It is risky out there: the costs of emergence and the benefits of prolonged dormancy. *Oecologia* 172, 937–947. .

Grousl, T., Ungelenk, S., Miller, S., Ho, C.-T., Khokhrina, M., Mayer, M.P., Bukau, B., and Mogk, A. (2018). A prion-like domain in Hsp42 drives chaperone-facilitated aggregation of misfolded proteins. *J. Cell Biol.* 217, 1269–1285. .

Guidetti, R., Altiero, T., and Rebecchi, L. (2011). On dormancy strategies in tardigrades. *J. Insect Physiol.* 57, 567–576. .

Haslbeck, M., Walke, S., Stromer, T., Ehrnsperger, M., White, H.E., Chen, S., Saibil, H.R., and Buchner, J. (1999). Hsp26: a temperature-regulated chaperone. *EMBO J.* 18, 6744–6751. .

Haslbeck, M., Braun, N., Stromer, T., Richter, B., Model, N., Weinkauff, S., and Buchner, J. (2004). Hsp42 is the general small heat shock protein in the cytosol of *Saccharomyces cerevisiae*. *EMBO J.* 23, 638–649. .

Haslbeck, M., Weinkauff, S., and Buchner, J. (2019). Small heat shock proteins: Simplicity meets complexity. *J. Biol. Chem.* 294, 2121–2132. .

Herman, P.K., and Rine, J. (1997). Yeast spore germination: a requirement for Ras protein activity during re-entry into the cell cycle. *EMBO J.* 16, 6171–6181. .

Ho, K.H., and Miller, J.J. (1978). Free proline content and sensitivity to desiccation and heat during yeast sporulation and spore germination. *Can. J. Microbiol.* 24, 312–320. .

Holehouse, A.S., Ginell, G.M., Griffith, D., and Böke, E. (2021). Clustering of aromatic residues in prion-like domains can tune the formation, state, and organization of biomolecular condensates. *Biochemistry* 60, 3566–3581. .

Huang, M., and Hull, C.M. (2017). Sporulation: how to survive on planet Earth (and beyond). *Curr. Genet.* 63, 831–838. .

Iserman, C., Desroches Altamirano, C., Jegers, C., Friedrich, U., Zarin, T., Fritsch, A.W., Mittasch, M., Domingues, A., Hersemann, L., Jahnel, M., et al. (2020). Condensation of Ded1p Promotes a Translational Switch from Housekeeping to Stress Protein Production. *Cell* 181, 818–831.e19. .

Janke, C., Magiera, M.M., Rathfelder, N., Taxis, C., Reber, S., Maekawa, H., Moreno-Borchart, A., Doenges, G., Schwob, E., Schiebel, E., et al. (2004). A versatile toolbox for PCR-based tagging of yeast genes: new fluorescent proteins, more markers and promoter substitution cassettes. *Yeast* 21, 947–962. .

Jumper, J., Evans, R., Pritzel, A., Green, T., Figurnov, M., Ronneberger, O., Tunyasuvunakool, K., Bates, R., Žídek, A., Potapenko, A., et al. (2021). Highly accurate protein structure prediction with AlphaFold. *Nature* 596, 583–589. .

Kane, S.M., and Roth, R. (1974). Carbohydrate metabolism during ascospore development in

yeast. *J. Bacteriol.* *118*, 8–14. .

Kanshin, E., Kubiniok, P., Thattikota, Y., D'Amours, D., and Thibault, P. (2015). Phosphoproteome dynamics of *Saccharomyces cerevisiae* under heat shock and cold stress. *Mol. Syst. Biol.* *11*, 813. .

Kerr, C.H., Skinnider, M.A., Andrews, D.D.T., Madero, A.M., Chan, Q.W.T., Stacey, R.G., Stoykov, N., Jan, E., and Foster, L.J. (2020). Dynamic rewiring of the human interactome by interferon signaling. *Genome Biol.* *21*, 140. .

Lancaster, A.K., Nutter-Upham, A., Lindquist, S., and King, O.D. (2014). PLAAC: a web and command-line application to identify proteins with prion-like amino acid composition. *Bioinformatics* *30*, 2501–2502. .

Leducq, J.-B., Nielly-Thibault, L., Charron, G., Eberlein, C., Verta, J.-P., Samani, P., Sylvester, K., Hittinger, C.T., Bell, G., and Landry, C.R. (2016). Speciation driven by hybridization and chromosomal plasticity in a wild yeast. *Nat Microbiol* *1*, 15003. .

Liu, I.-C., Chiu, S.-W., Lee, H.-Y., and Leu, J.-Y. (2012). The histone deacetylase Hos2 forms an Hsp42-dependent cytoplasmic granule in quiescent yeast cells. *Mol. Biol. Cell* *23*, 1231–1242. .

Liu, Z., Zhang, S., Gu, J., Tong, Y., Li, Y., Gui, X., Long, H., Wang, C., Zhao, C., Lu, J., et al. (2020). Hsp27 chaperones FUS phase separation under the modulation of stress-induced phosphorylation. *Nat. Struct. Mol. Biol.* *27*, 363–372. .

Madshus, I.H. (1988). Regulation of intracellular pH in eukaryotic cells. *Biochem. J* *250*, 1–8. .

Martínez-Montañés, F., Casanovas, A., Sprenger, R.R., Topolska, M., Marshall, D.L., Moreno-Torres, M., Poad, B.L.J., Blanksby, S.J., Hermansson, M., Jensen, O.N., et al. (2020). Phosphoproteomic Analysis across the Yeast Life Cycle Reveals Control of Fatty Acyl Chain Length by Phosphorylation of the Fatty Acid Synthase Complex. *Cell Reports* *32*, 108024. <https://doi.org/10.1016/j.celrep.2020.108024>.

van Mierlo, G., Jansen, J.R.G., Wang, J., Poser, I., van Heeringen, S.J., and Vermeulen, M. (2021). Predicting protein condensate formation using machine learning. *Cell Rep.* *34*, 108705. .

Miesenböck, G., De Angelis, D.A., and Rothman, J.E. (1998). Visualizing secretion and synaptic transmission with pH-sensitive green fluorescent proteins. *Nature* *394*, 192–195. .

Miller, A.K., Brown, J.S., Enderling, H., Basanta, D., and Whelan, C.J. (2021). The Evolutionary Ecology of Dormancy in Nature and in Cancer. *Frontiers in Ecology and Evolution* *9*. <https://doi.org/10.3389/fevo.2021.676802>.

Mok, J., Kim, P.M., Lam, H.Y.K., Piccirillo, S., Zhou, X., Jeschke, G.R., Sheridan, D.L., Parker, S.A., Desai, V., Jwa, M., et al. (2010). Deciphering protein kinase specificity through large-scale analysis of yeast phosphorylation site motifs. *Sci. Signal.* *3*, ra12. .

Molines, A.T., Lemièrre, J., Gazzola, M., Steinmark, I.E., Edrington, C.H., Hsu, C.-T., Real-Calderon, P., Suhling, K., Goshima, G., Holt, L.J., et al. (2022). Physical properties of the cytoplasm modulate the rates of microtubule polymerization and depolymerization. *Dev. Cell* *57*,

466–479.e6. .

Mühlhofer, M., Peters, C., Kriehuber, T., Kreuzeder, M., Kazman, P., Rodina, N., Reif, B., Haslbeck, M., Weinkauf, S., and Buchner, J. (2021). Phosphorylation activates the yeast small heat shock protein Hsp26 by weakening domain contacts in the oligomer ensemble. *Nat. Commun.* *12*, 6697. .

Munder, M.C., Midtvedt, D., Franzmann, T., Nüske, E., Otto, O., Herbig, M., Ulbricht, E., Müller, P., Taubenberger, A., Maharana, S., et al. (2016). A pH-driven transition of the cytoplasm from a fluid- to a solid-like state promotes entry into dormancy. *eLife* *5*.  
<https://doi.org/10.7554/elife.09347>.

Narayanaswamy, R., Levy, M., Tsechansky, M., Stovall, G.M., O'Connell, J.D., Mirrielees, J., Ellington, A.D., and Marcotte, E.M. (2009). Widespread reorganization of metabolic enzymes into reversible assemblies upon nutrient starvation. *Proc. Natl. Acad. Sci. U. S. A.* *106*, 10147–10152. .

Neiman, A.M. (2011). Sporulation in the budding yeast *Saccharomyces cerevisiae*. *Genetics* *189*, 737–765. .

Oren, Y. (2022). Standing on the shoulders of microbes: How cancer biologists are expanding their view of hard-to-kill persister cells. *Mol. Syst. Biol.* *18*, e11168. .

Ortiz, S.C., Huang, M., and Hull, C.M. (2019). Spore Germination as a Target for Antifungal Therapeutics. *Antimicrob. Agents Chemother.* <https://doi.org/10.1128/AAC.00994-19>.

Parry, B.R., Surovtsev, I.V., Cabeen, M.T., O'Hern, C.S., Dufresne, E.R., and Jacobs-Wagner, C. (2014). The Bacterial Cytoplasm Has Glass-like Properties and Is Fluidized by Metabolic Activity. *Cell* *156*, 183–194. <https://doi.org/10.1016/j.cell.2013.11.028>.

Parsell, D.A., and Lindquist, S. (1993). The function of heat-shock proteins in stress tolerance: degradation and reactivation of damaged proteins. *Annu. Rev. Genet.* *27*, 437–496. .

Penfield, S. (2017). Seed dormancy and germination. *Curr. Biol.* *27*, R874–R878. .

Penfield, S. (2021). Water sensing in seeds by FLOE1 phase transitions. *Dev. Cell* *56*, 2140–2141. .

Perez-Riverol, Y., Bai, J., Bandla, C., García-Seisdedos, D., Hewapathirana, S., Kamatchinathan, S., Kundu, D.J., Prakash, A., Frericks-Zipper, A., Eisenacher, M., et al. (2022). The PRIDE database resources in 2022: a hub for mass spectrometry-based proteomics evidences. *Nucleic Acids Res.* *50*, D543–D552. .

Persson, L.B., Ambati, V.S., and Brandman, O. (2020). Cellular Control of Viscosity Counters Changes in Temperature and Energy Availability. *Cell* *183*, 1572–1585.e16. .

Petrovska, I., Nüske, E., Munder, M.C., Kulasegaran, G., Malinowska, L., Kroschwald, S., Richter, D., Fahmy, K., Gibson, K., Verbavatz, J.-M., et al. (2014). Filament formation by metabolic enzymes is a specific adaptation to an advanced state of cellular starvation. *Elife* *3*,



e02409. .

Phan, T.G., and Croucher, P.I. (2020). The dormant cancer cell life cycle. *Nat. Rev. Cancer* 20, 398–411. .

Plante, S., and Landry, C.R. (2020a). Closely related budding yeast species respond to different ecological signals for spore activation.

Plante, S., and Landry, C.R. (2020b). Purification of Yeast Spores to Investigate Their Dynamics of Activation. *Current Protocols in Microbiology* 59. <https://doi.org/10.1002/cpmc.123>.

Plante, S., Normant, V., Ramos-Torres, K.M., and Labbé, S. (2017). Cell-surface copper transporters and superoxide dismutase 1 are essential for outgrowth during fungal spore germination. *J. Biol. Chem.* 292, 11896–11914. .

Riback, J.A., Katanski, C.D., Kear-Scott, J.L., Pilipenko, E.V., Rojek, A.E., Sosnick, T.R., and Drummond, D.A. (2017). Stress-Triggered Phase Separation Is an Adaptive, Evolutionarily Tuned Response. *Cell* 168, 1028–1040.e19. .

Schneider, C.A., Rasband, W.S., and Eliceiri, K.W. (2012). NIH Image to ImageJ: 25 years of image analysis. *Nat. Methods* 9, 671–675. .

Schwanhäusser, B., Busse, D., Li, N., Dittmar, G., Schuchhardt, J., Wolf, J., Chen, W., and Selbach, M. (2011). Global quantification of mammalian gene expression control. *Nature* 473, 337–342. .

Shevchenko, A., Wilm, M., Vorm, O., and Mann, M. (1996). Mass Spectrometric Sequencing of Proteins from Silver-Stained Polyacrylamide Gels. *Analytical Chemistry* 68, 850–858. <https://doi.org/10.1021/ac950914h>.

Silva, A., Cavero, S., Begley, V., Solé, C., Böttcher, R., Chávez, S., Posas, F., and de Nadal, E. (2017). Regulation of transcription elongation in response to osmostress. *PLOS Genetics* 13, e1007090. <https://doi.org/10.1371/journal.pgen.1007090>.

Smith, P.K., Krohn, R.I., Hermanson, G.T., Mallia, A.K., Gartner, F.H., Provenzano, M.D., Fujimoto, E.K., Goeke, N.M., Olson, B.J., and Klenk, D.C. (1985). Measurement of protein using bicinchoninic acid. *Analytical Biochemistry* 150, 76–85. [https://doi.org/10.1016/0003-2697\(85\)90442-7](https://doi.org/10.1016/0003-2697(85)90442-7).

Sprouffske, K., and Wagner, A. (2016). Growthcurver: an R package for obtaining interpretable metrics from microbial growth curves. *BMC Bioinformatics* 17, 172. .

Stoddard, P.R., Lynch, E.M., Farrell, D.P., Dosey, A.M., DiMaio, F., Williams, T.A., Kollman, J.M., Murray, A.W., and Garner, E.C. (2020). Polymerization in the actin ATPase clan regulates hexokinase activity in yeast. *Science* 367, 1039–1042. .

Swaney, D.L., Beltrao, P., Starita, L., Guo, A., Rush, J., Fields, S., Krogan, N.J., and Villén, J. (2013). Global analysis of phosphorylation and ubiquitylation cross-talk in protein degradation. *Nat. Methods* 10, 676–682. .

Triandafillou, C.G., and Drummond, D.A. (2020). Live Cell Measurement of the Intracellular pH of Yeast by Flow Cytometry Using a Genetically-Encoded Fluorescent Reporter. *Bio Protoc* *10*, e3653. .

Triandafillou, C.G., Katanski, C.D., Dinner, A.R., and Drummond, D.A. (2020). Transient intracellular acidification regulates the core transcriptional heat shock response. *Elife* *9*. <https://doi.org/10.7554/eLife.54880>.

Vlaar, L.E., Bertran, A., Rahimi, M., Dong, L., Kammenga, J.E., Helder, J., Goverse, A., and Bouwmeester, H.J. (2021). On the role of dauer in the adaptation of nematodes to a parasitic lifestyle. *Parasit. Vectors* *14*, 554. .

Wallace, E.W.J., Kear-Scott, J.L., Pilipenko, E.V., Schwartz, M.H., Laskowski, P.R., Rojek, A.E., Katanski, C.D., Riback, J.A., Dion, M.F., Franks, A.M., et al. (2015). Reversible, Specific, Active Aggregates of Endogenous Proteins Assemble upon Heat Stress. *Cell* *162*, 1286–1298. .

Wippich, F., Bodenmiller, B., Trajkovska, M.G., Wanka, S., Aebersold, R., and Pelkmans, L. (2013). Dual specificity kinase DYRK3 couples stress granule condensation/dissolution to mTORC1 signaling. *Cell* *152*, 791–805. .

Wyatt, T.T., Wösten, H.A.B., and Dijksterhuis, J. (2013). Fungal spores for dispersion in space and time. *Adv. Appl. Microbiol.* *85*, 43–91. .

Yoo, H., Bard, J.A.M., Pilipenko, E.V., and Drummond, D.A. (2022). Chaperones directly and efficiently disperse stress-triggered biomolecular condensates. *Mol. Cell* *82*, 741–755.e11. .



## Figures and legends

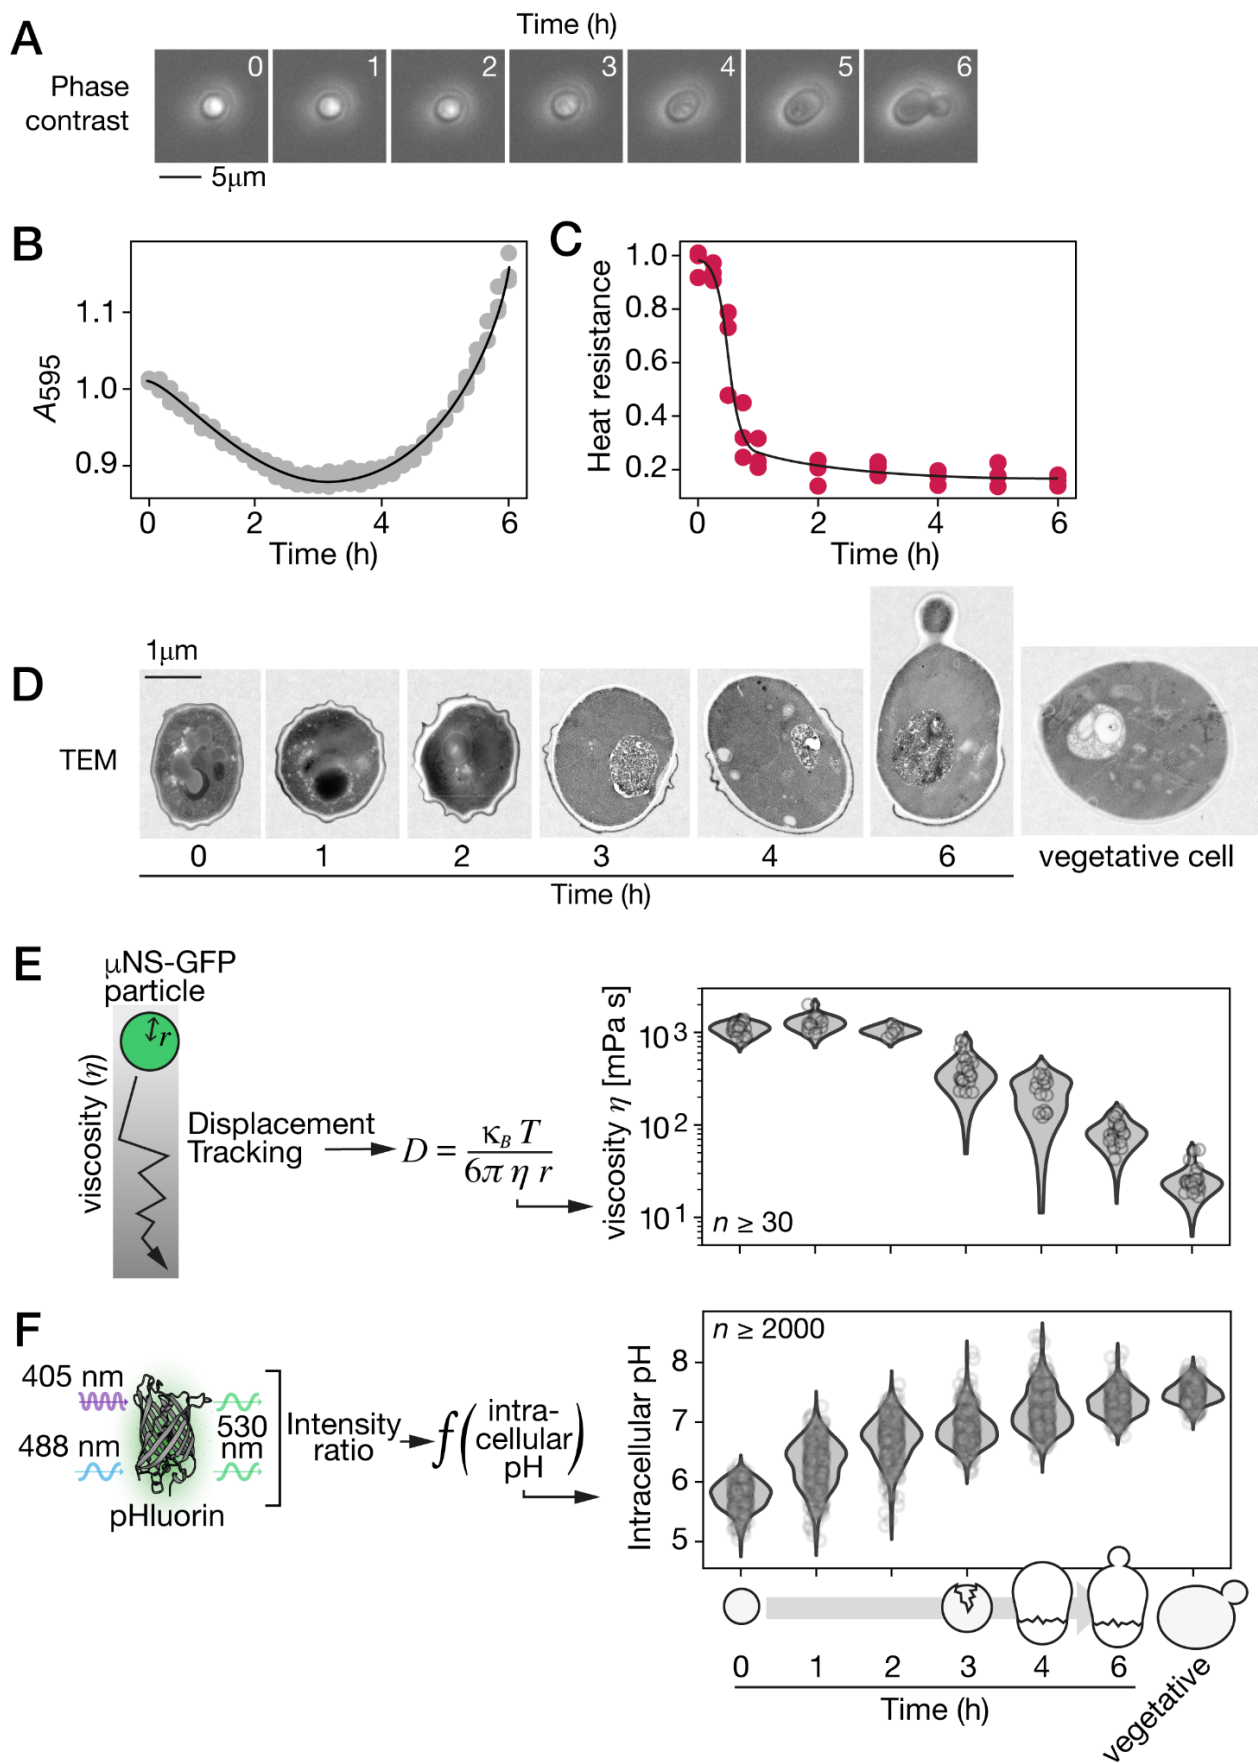

**Figure 1 - The cytoplasm of dormant cells displays high viscosity and is an acidic environment.**

- A) Representative phase-contrast microscopic images of a spore at the indicated time after exposure to rich media, which activates germination. Scale bar represents 5  $\mu\text{m}$ .
- B) Optical density ( $A_{595}$ ) and C) heat resistance of pure spore cultures through time after exposure to rich media. Heat resistance is the ratio of growth after a heat shock at 55°C for 10 minutes to growth without heat treatment. Experiments were performed in triplicate and values for individual replicates are shown.
- D) Representative transmission electron microscopic (TEM) images of spores at the indicated time after exposure to rich media, and of a vegetatively growing yeast cell (vegetative). The scale bar represents 1  $\mu\text{m}$ . See Figure S1A for more examples.
- E) Left, effective viscosity ( $\eta$ ) was estimated from the displacement constant of a single  $\mu\text{NS-GFP}$  particle of radius  $r$  using the Stock-Einstein relation. Right, single cell measurement of viscosity at the indicated time points after exposure to rich media, and in vegetatively growing yeast cells. Results of tracking of 30 to 35 particles in 30 to 32 cells at each time point.
- F) Left, pHluorin is excited with a 405 nm and 488 nm laser, and the ratio of fluorescence varies as a function of intracellular pH. Right, intracellular pH measured at the indicated time point after germination induction, and in exponentially growing cells. Measurements in at least 2000 cells are shown at each time point.

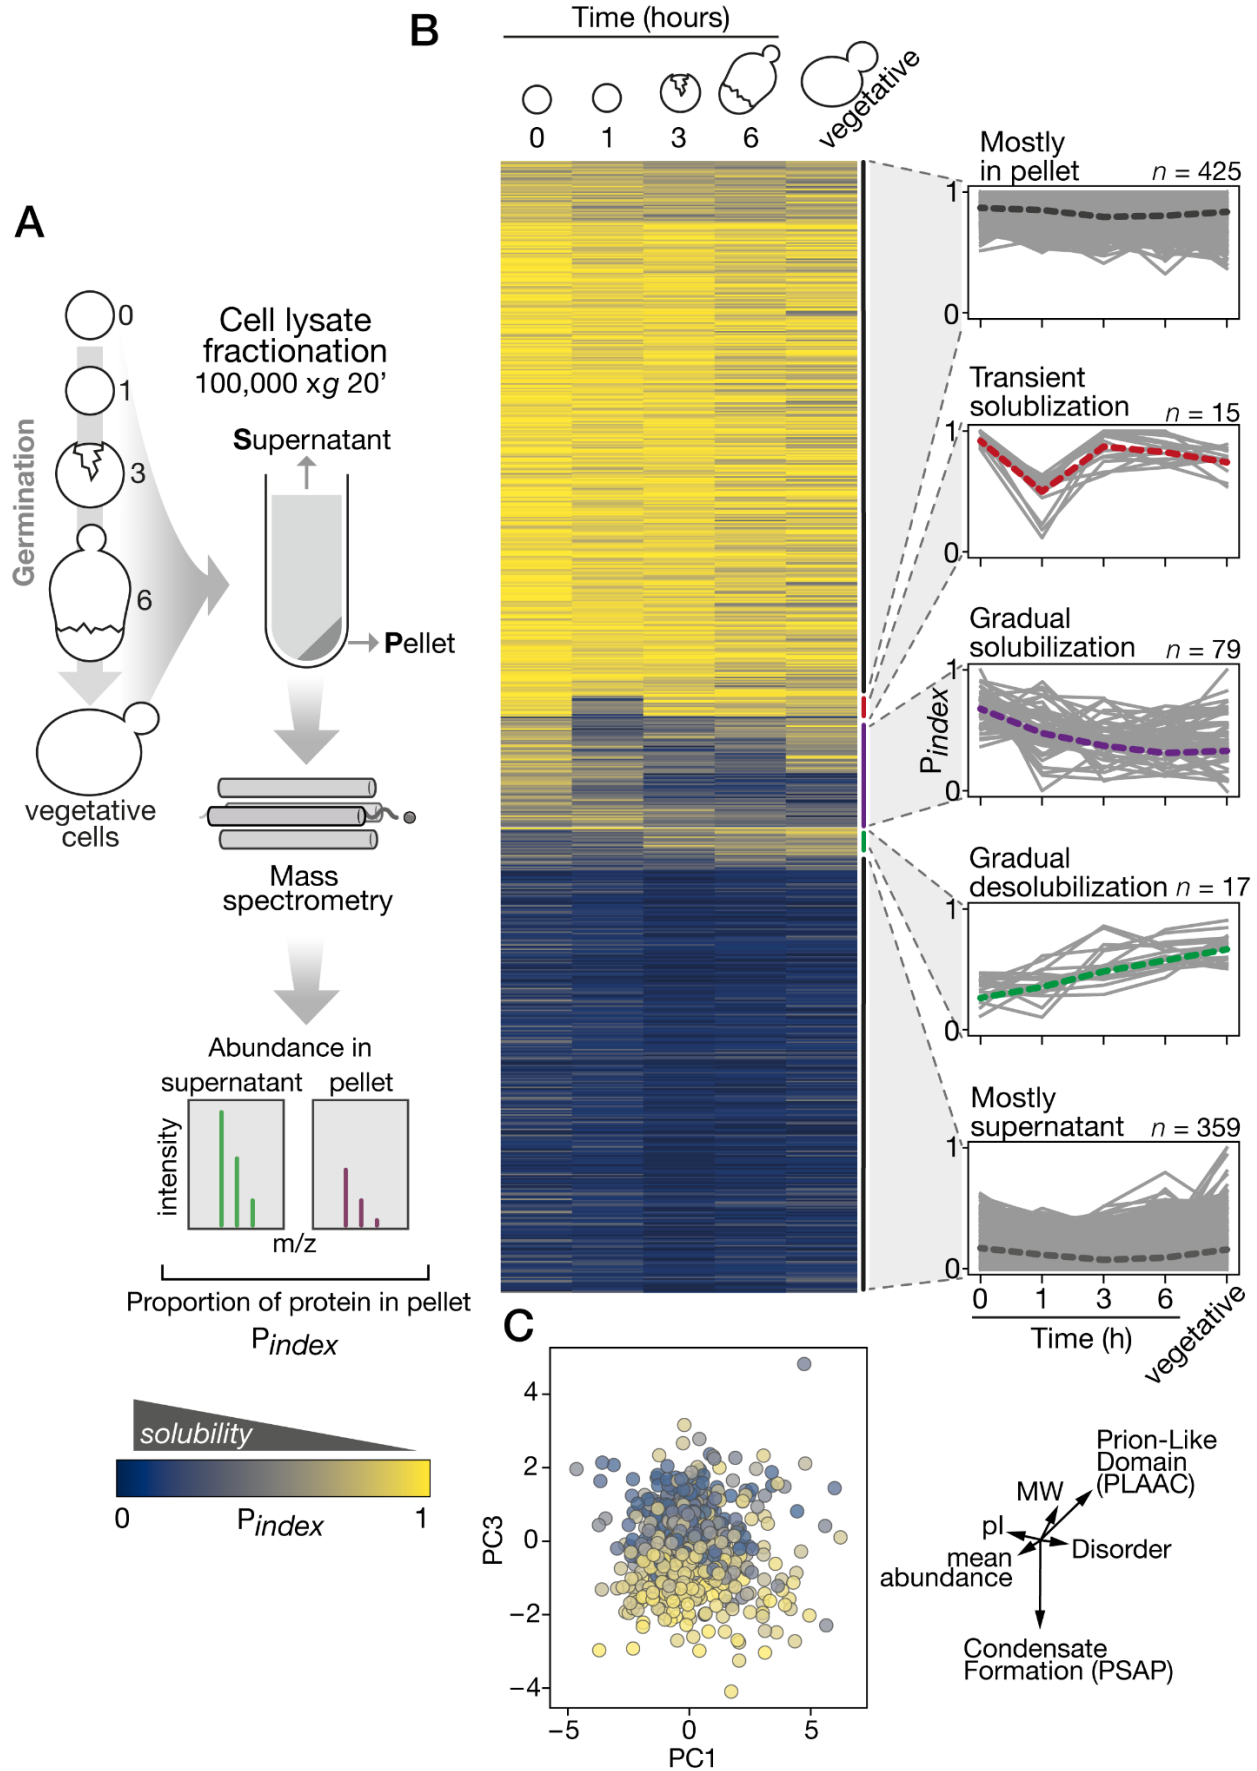

## Figure 2 - Proteome wide change in protein solubility during germination.

A) Solubility measurement by LC-MS/MS estimates the proportion of each protein in the pellet ( $P_{\text{index}}$ ) at each major time-point sampled during germination. The experiment was performed in triplicate for all timepoints.

B) Right,  $P_{\text{index}}$  values in the course of germination show, from top to bottom, proteins consistently found in the pellet, that transiently solubilize, that gradually solubilize, that gradually accumulate in the pellet, and that are consistently found in the supernatant. Left, individual  $P_{\text{index}}$  trajectories for each cluster determined by hierarchical clustering. The dotted line is the median trajectory for each cluster.

C) Left, PCA analysis of multivariate distribution for all proteins, dots are colored according to mean  $P_{\text{index}}$ . Right, vectors indicate the strength and direction of the contribution of each variable to the distribution; sequence-based estimation of molecular weight (MW) and isoelectric point (pI); mean abundance measured from our proteomic data; Prion-like amino acid composition (PLAAC) prediction score; analysis and prediction score of phase separation (PSAP); sequence-based prediction of disorder (Metapredict). See Figure S2 for additional details.

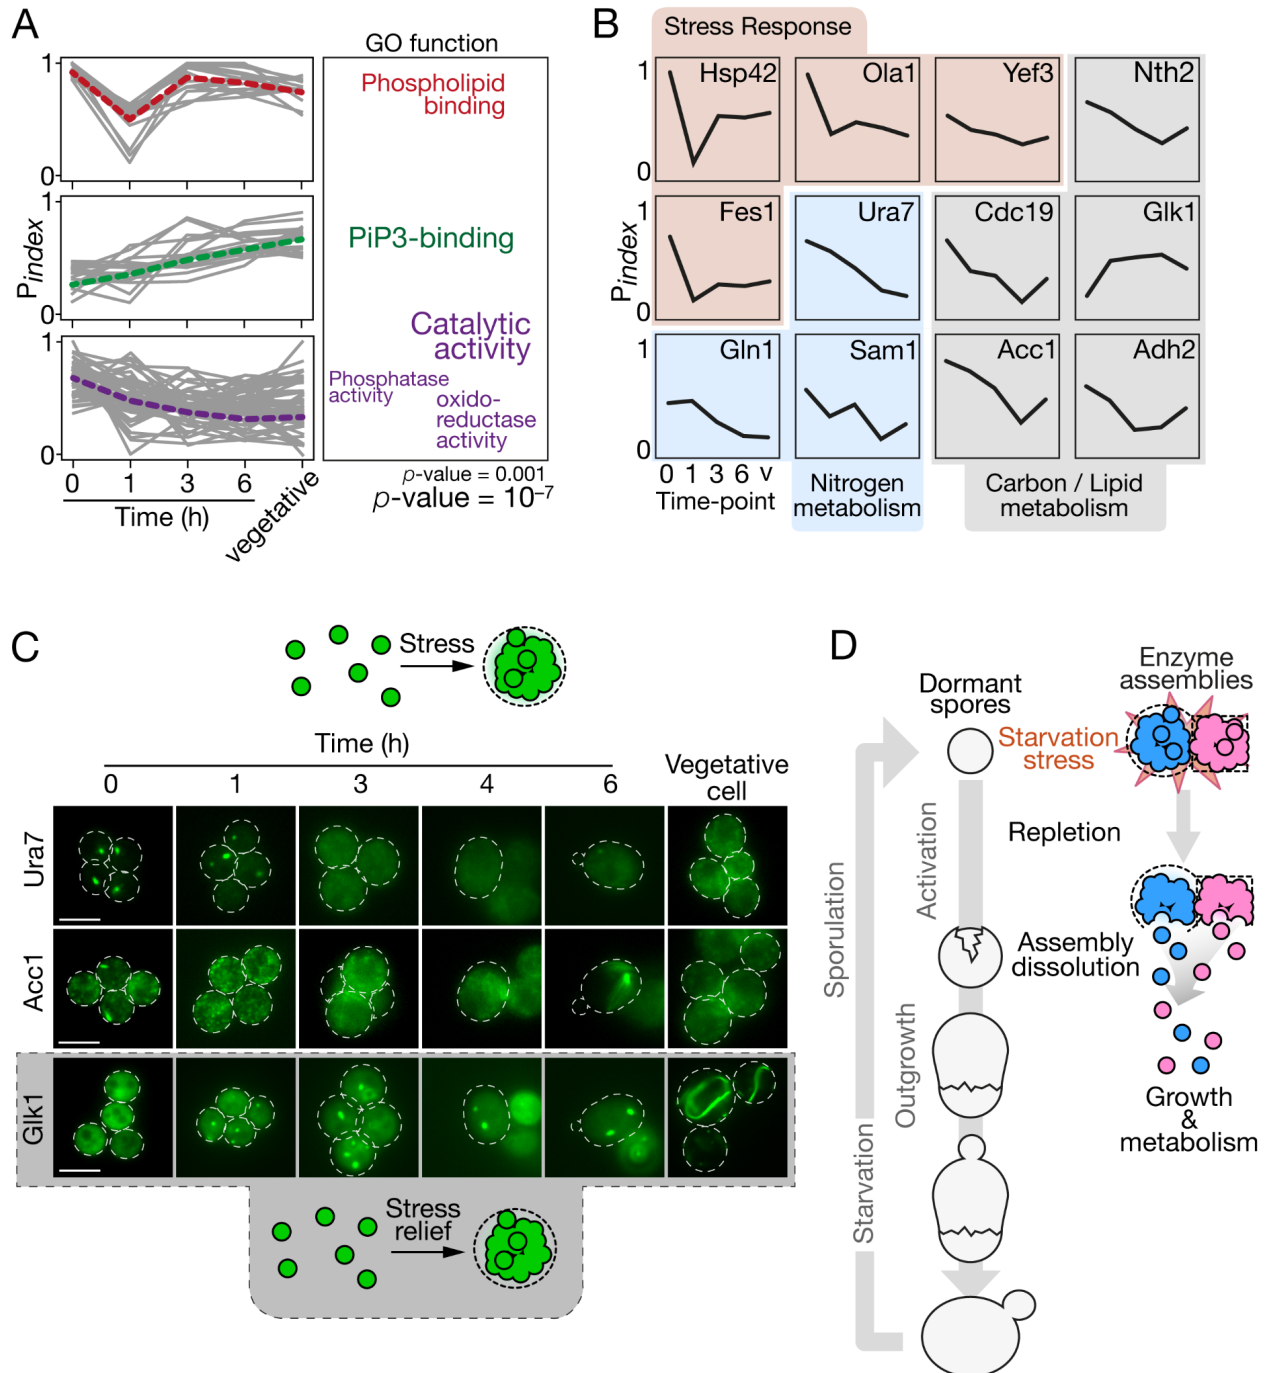

**Figure 3 - Solubility changes reflect metabolism activation and stress relief during germination.**

A) Enrichment for gene ontology terms in each dynamically changing solubility cluster. Red, transiently solubilizing cluster; Green, gradual desolubilization cluster; Purple, gradual solubilization cluster. P-values are from a hypergeometric test. Font size scales with  $-\log_{10}(p\text{-value})$ . p-values are shown at bottom right for scale.

B) Individual  $P_{\text{index}}$  trajectory for representative proteins through germination. Proteins are clustered by function; Red, stress response proteins; Blue, Nitrogen metabolism proteins; Gray, Lipid and carbon metabolism proteins.

C) Representative fluorescence microscopic images of spores expressing the indicated proteins tagged with GFP during germination. Top, Acetyl-CoA carboxylase Acc1 (Lipid biosynthesis) and CTP synthase Ura7 (pyrimidines synthesis) have similar comportement as they both condense upon stress; bottom, Glucokinase Glk1 (glycolysis) behaves in an opposite manner; it aggregate upon nutrient repletion. Dotted lines indicate cell contour determined by brightfield images. Scale bars represent 5 $\mu\text{m}$ .

D) Schematics highlighting effects on protein solubility of nutrient starvation and repletion during sporulation and germination, respectively.

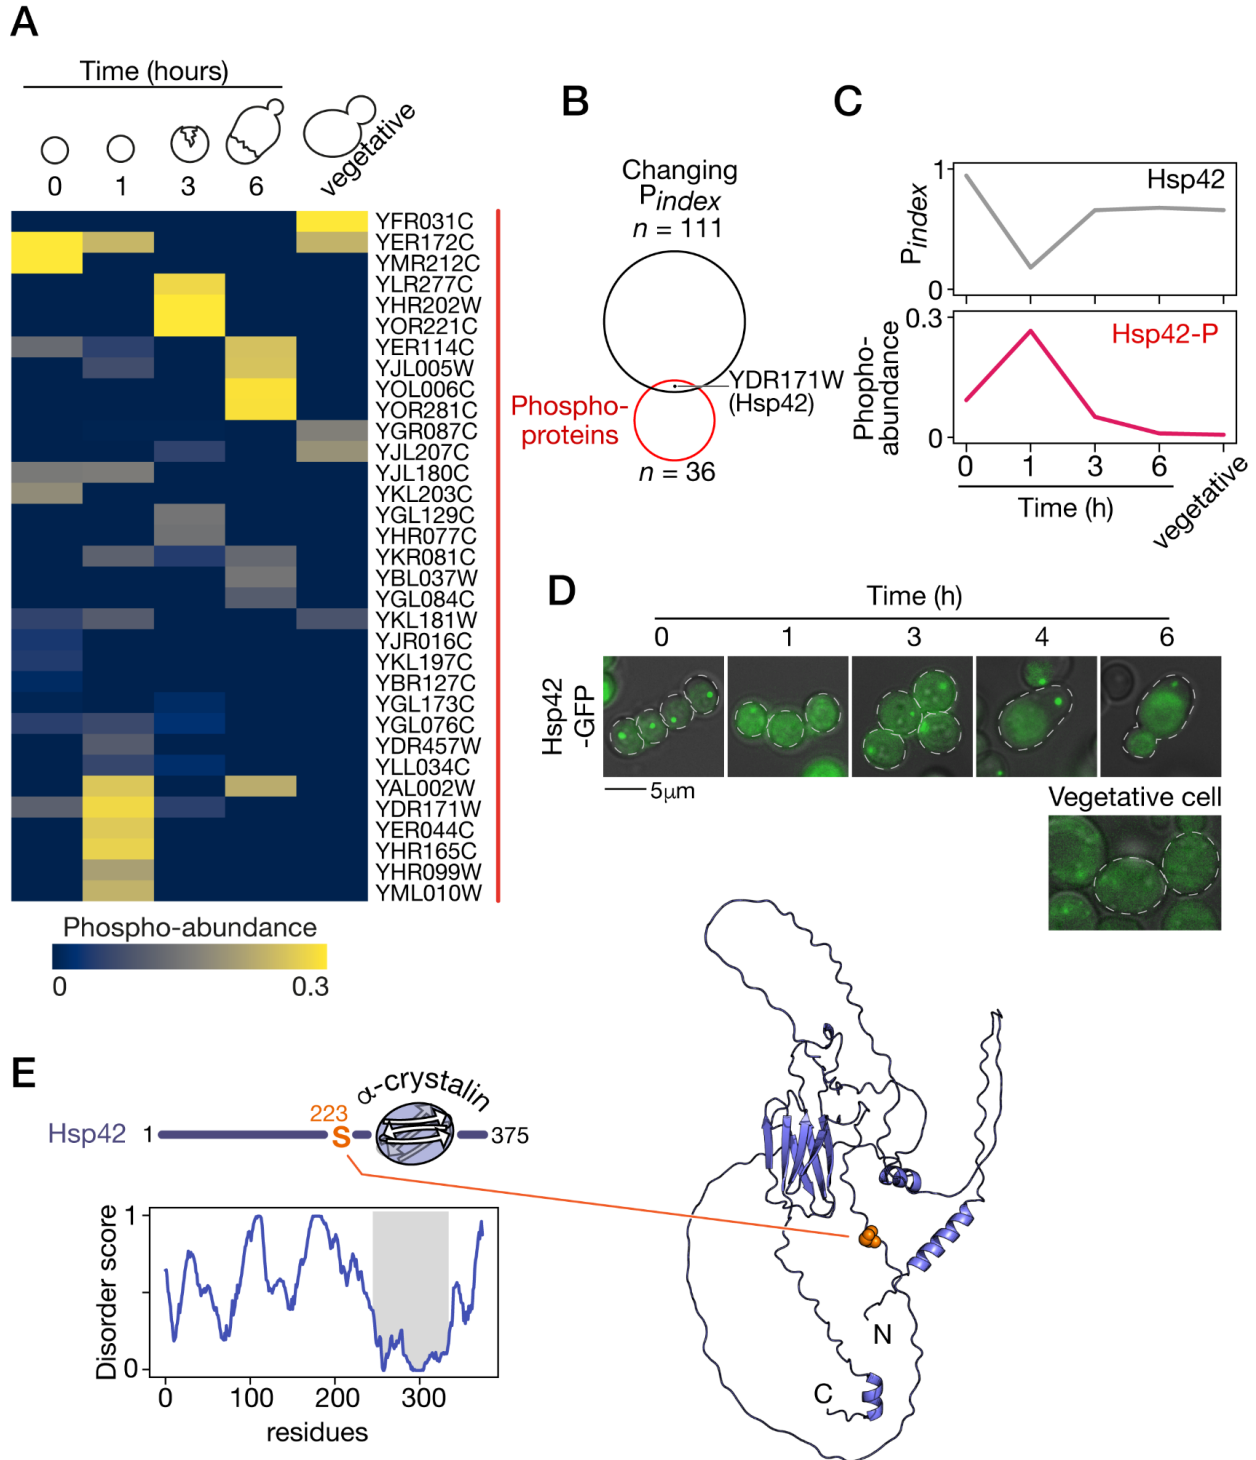

**Figure 4 - Hsp42 phosphorylation at S223 is synchronized with its transient solubilization.**

A) Relative abundance of the 36 phosphoproteins to the total abundance of each protein through germination.



B) Hsp42 is phosphorylated during germination and changes solubility. See Figure S3 for additional information.

C) Hsp42 is the only protein with dynamic solubility profile during germination that correlates with its dynamic phosphorylation at S223.

D) Representative fluorescence microscopic images of spores expressing Hsp42-GFP at the indicated time after the induction of germination. Dotted lines represent cell contour. Scale bar represents 5 $\mu$ m.

E) Left, Disorder profile of Hsp42, predicted by Metapredict, shows the predicted structured ACD domain, and flanking disordered N- and C-terminal region. Right, predicted Hsp42 structure. The S223 highlighted in orange is located in a disordered region.

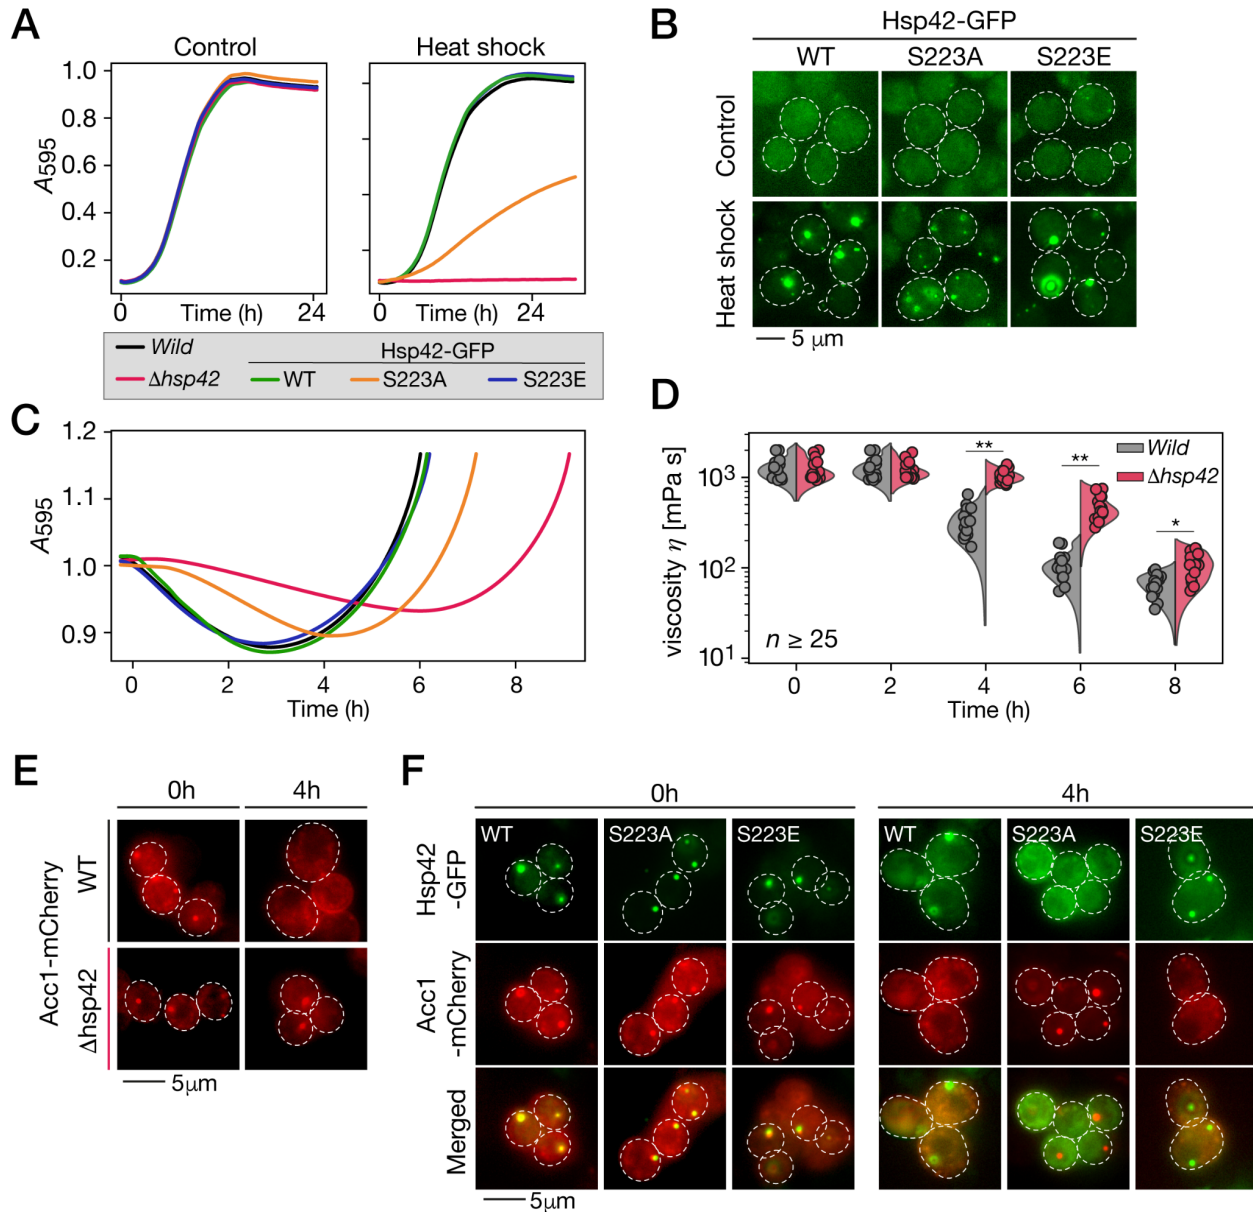

**Figure 5 - Active and phosphorylated Hsp42 is required for normal germination dynamics.**

A) Growth curves of vegetative cells of the indicated strains after a heat shock (right) or a mock treatment at control temperature (left). Shown are the data of one replicate representative of three independent experiments. The non-phosphorylatable Hsp42 at S223 shows intermediate heat-shock resistance between the WT (and phosphomimetic) and *HSP42* deleted cells. This confirms that the phosphorylation of Hsp42 at this site is important for its function.

B) Fluorescence microscopic images of WT or mutant Hsp42-GFP expressing cells, in control conditions (top) or after a heat shock (bottom). Dotted lines represent cell

contour. Scale bar represents 5  $\mu\text{m}$ . The non-phosphorylatable Hsp42 at S223 shows smaller and fainter aggregates in cells following heat shock at 50°C for 10 minutes compared to WT and phosphomimetic.

C) Optical density measurements of pure spore culture following exposure to germination conditions. Lines are colored according to the strain like in A)

D) Effective viscosity measured in wild type (grey) or  $\Delta\text{Hsp42}$  spores at the indicated time after the induction of germination. At each time point for each strain, 25 to 35 particles, corresponding to the same number of cells, were tracked. Kruskal-Wallis test, \*\* indicates p-value < 0.0001, \* indicates p-value < 0.01.

E) Fluorescence microscopy images of wild type (top) or  $\Delta\text{Hsp42}$  spores expressing Acc1-mCherry at the indicated time after exposure to germination conditions. Scale bar represents 5  $\mu\text{m}$ .

F) Fluorescence microscopy images of spores expressing either WT or mutants Hsp42-GFP and Acc1-mCherry at the indicated time after exposure to germination conditions. Dotted lines represent cell contour. Scale bar represents 5  $\mu\text{m}$ . Expression of non-phosphorylatable Hsp42 at S223 shows delay in Acc1 foci dissolution in spores.

Supplemental informations

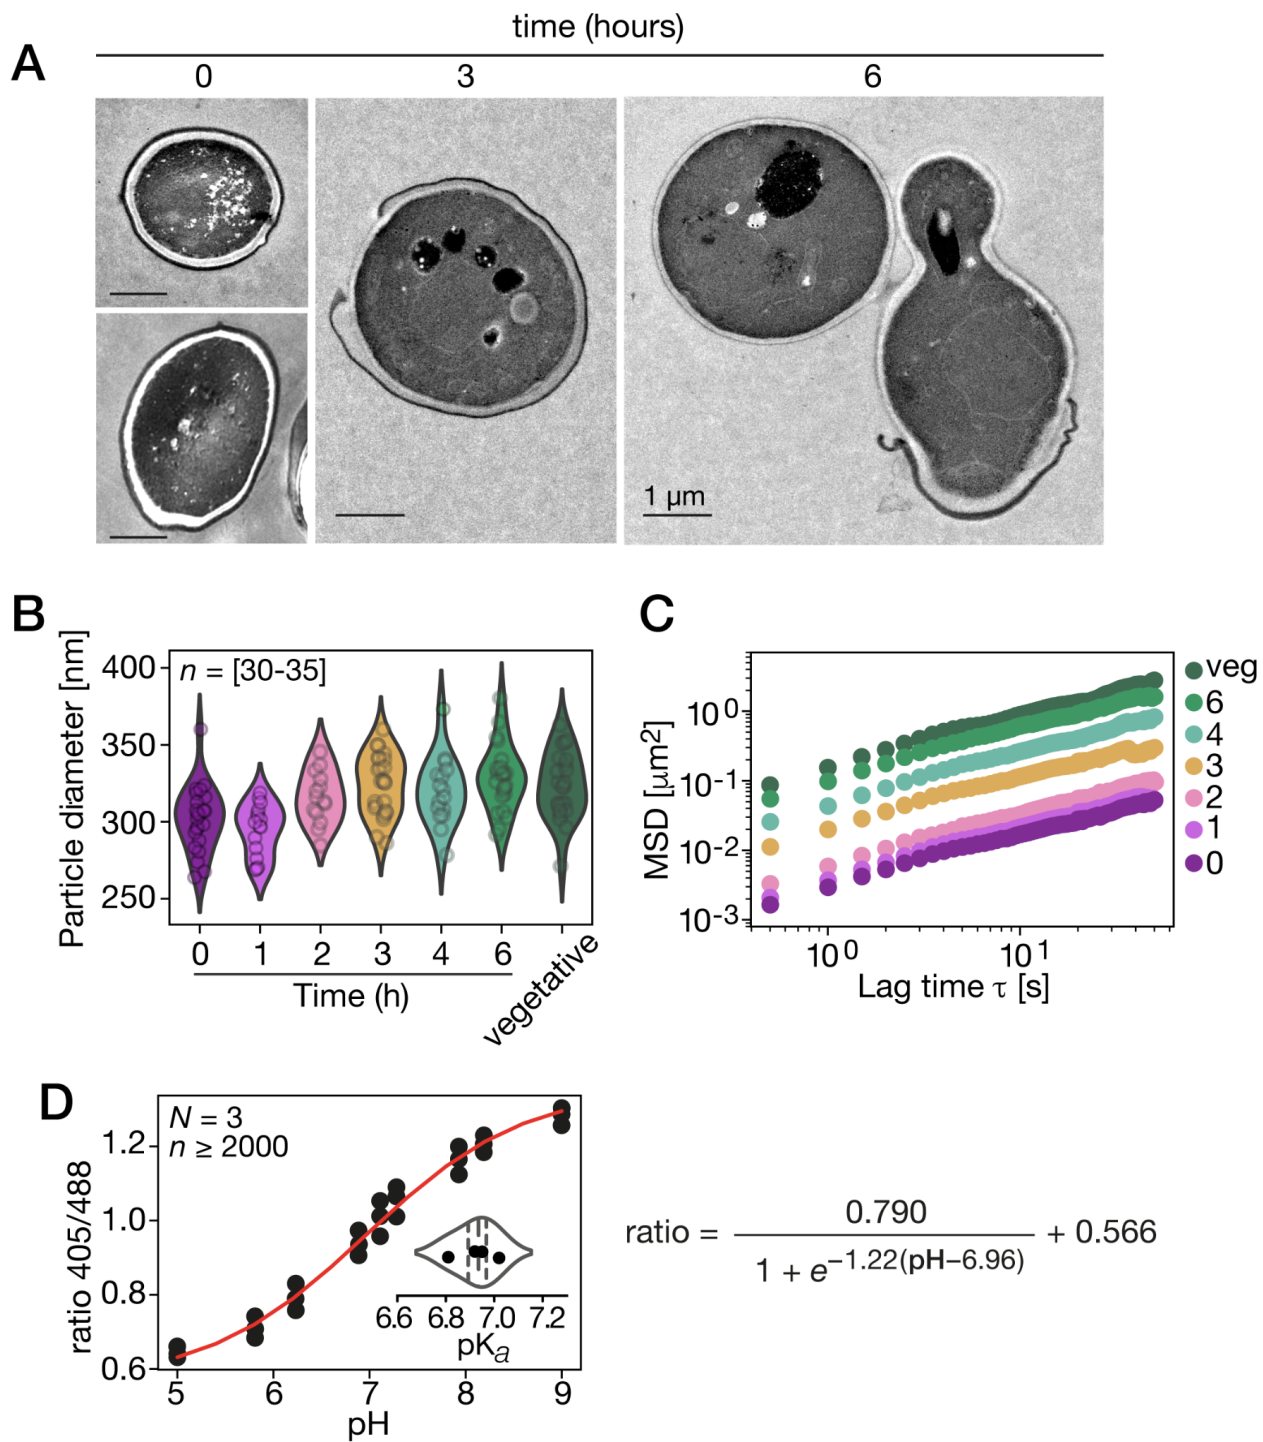

**Figure S1 -  $\mu$ NS-GFP particle size and Mean square displacement (MSD) during germination; calibration curve of pHluorin emission ratio, related to figure 1.**

- A) Transmission electron microscopy images of spores at the indicated time after exposure to rich medium. Scale bar represents 1  $\mu\text{m}$ .
- B) Size of individual particles tracked at each time point during germination and in vegetatively growing cells. At least 30 particles were tracked at each time point
- C) Mean square displacement (MSD) for each time point. Obtained from combining the 30 to 35 tracked particles. Points are colored according to the time point.
- D) Calibration curves for pH determination. The experiment was done on three technical replicates. At each pH point, at least 2000 events were recorded. Inset, plot of the measured pKa of pHluorin for each replicate. Right, logistic function fitted to the data that was used to estimate intracellular pH (Figure 1F).

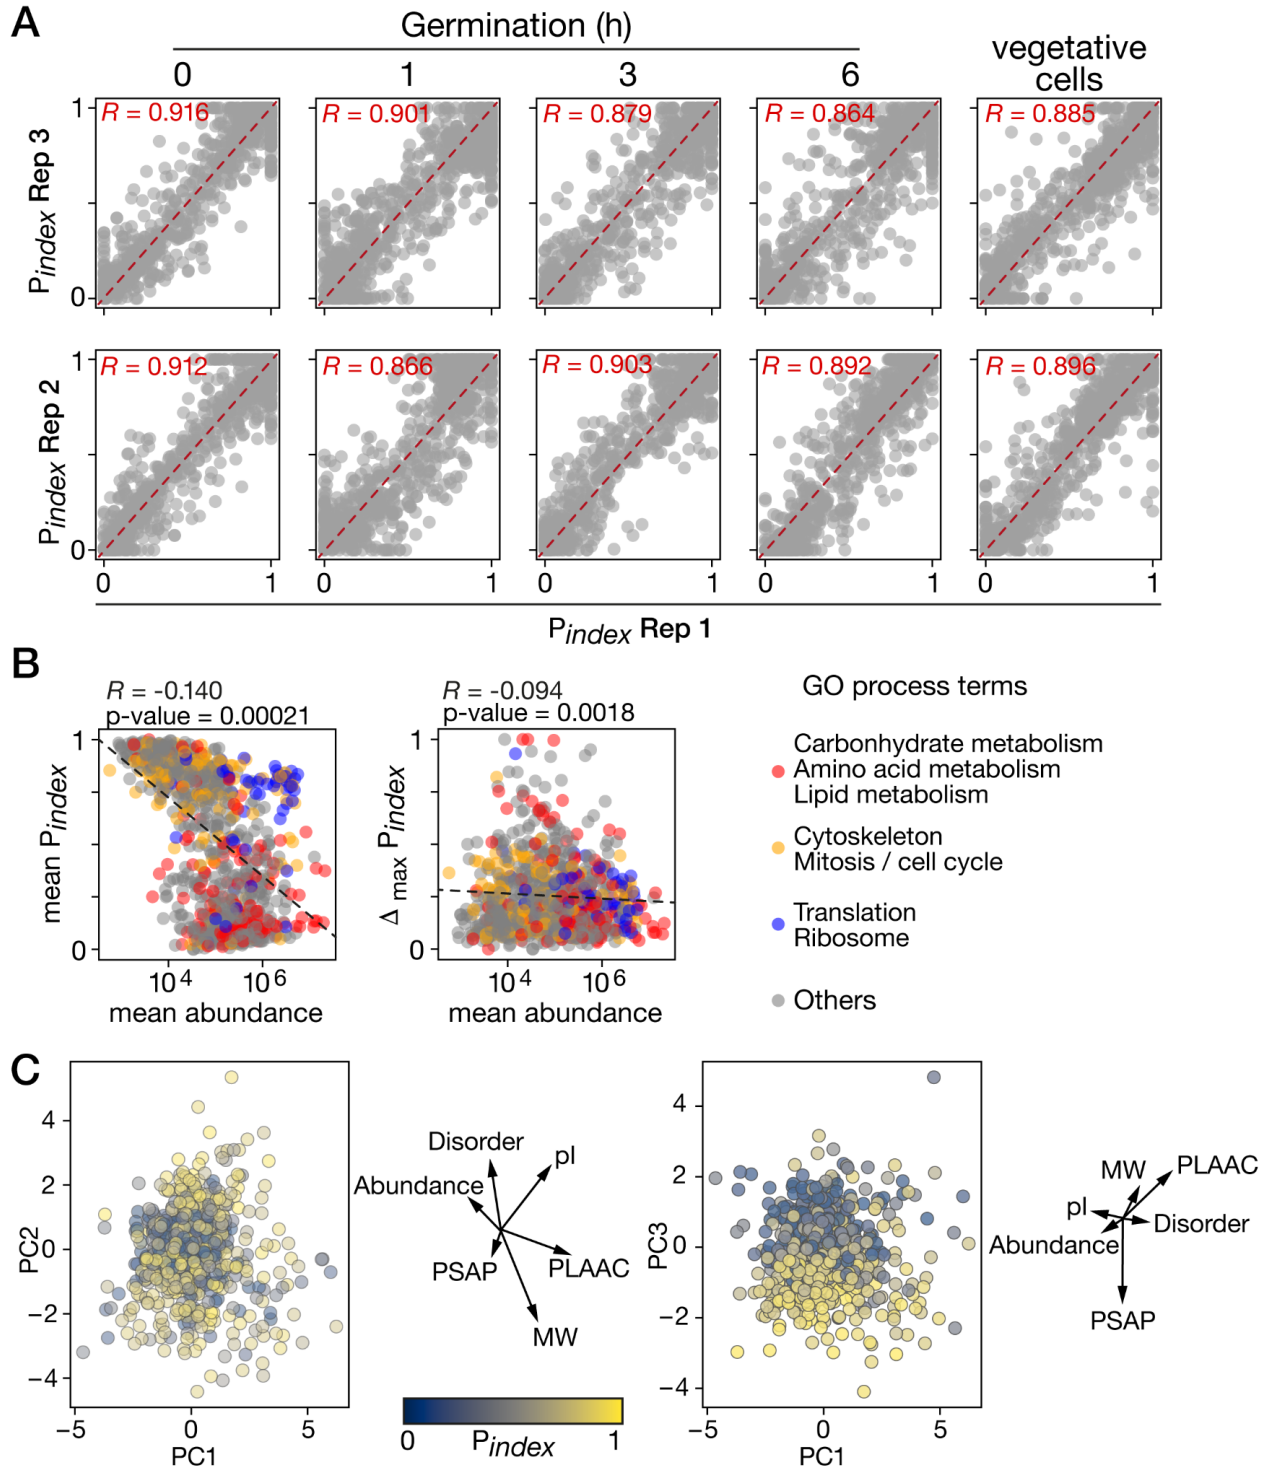

**Figure S2 - P<sub>index</sub> correlation between replicates, influence of protein abundance on solubility measurements, and contribution of protein properties on P<sub>index</sub> distribution. Related to Figure 2.**

- A)  $P_{\text{index}}$  values are plotted against other replicates. Pearson's correlation coefficients are indicated on each graph. For all correlations,  $p\text{-value} < 0.0001$ .
- B) Mean of the absolute abundance estimated from mass spectrometry data during germination is plotted against mean  $P_{\text{index}}$  values (left), or the maximal  $P_{\text{index}}$  variation (right,  $\Delta_{\text{max}}P_{\text{index}}$ ) of each protein. Points are colored depending on the GO function term. Pearson's correlation coefficient with the  $\log_{10}$ -transformed abundance values are shown with the corresponding  $p$ -values.
- C) PCA analysis of protein properties. Protein distribution across PC1 vs PC2 (left) and PC1 vs PC3 (right). Dots are colors according to the mean  $P_{\text{index}}$  value. Beside the graph is the vector representation of the contribution of each protein properties to each principal component plotted.



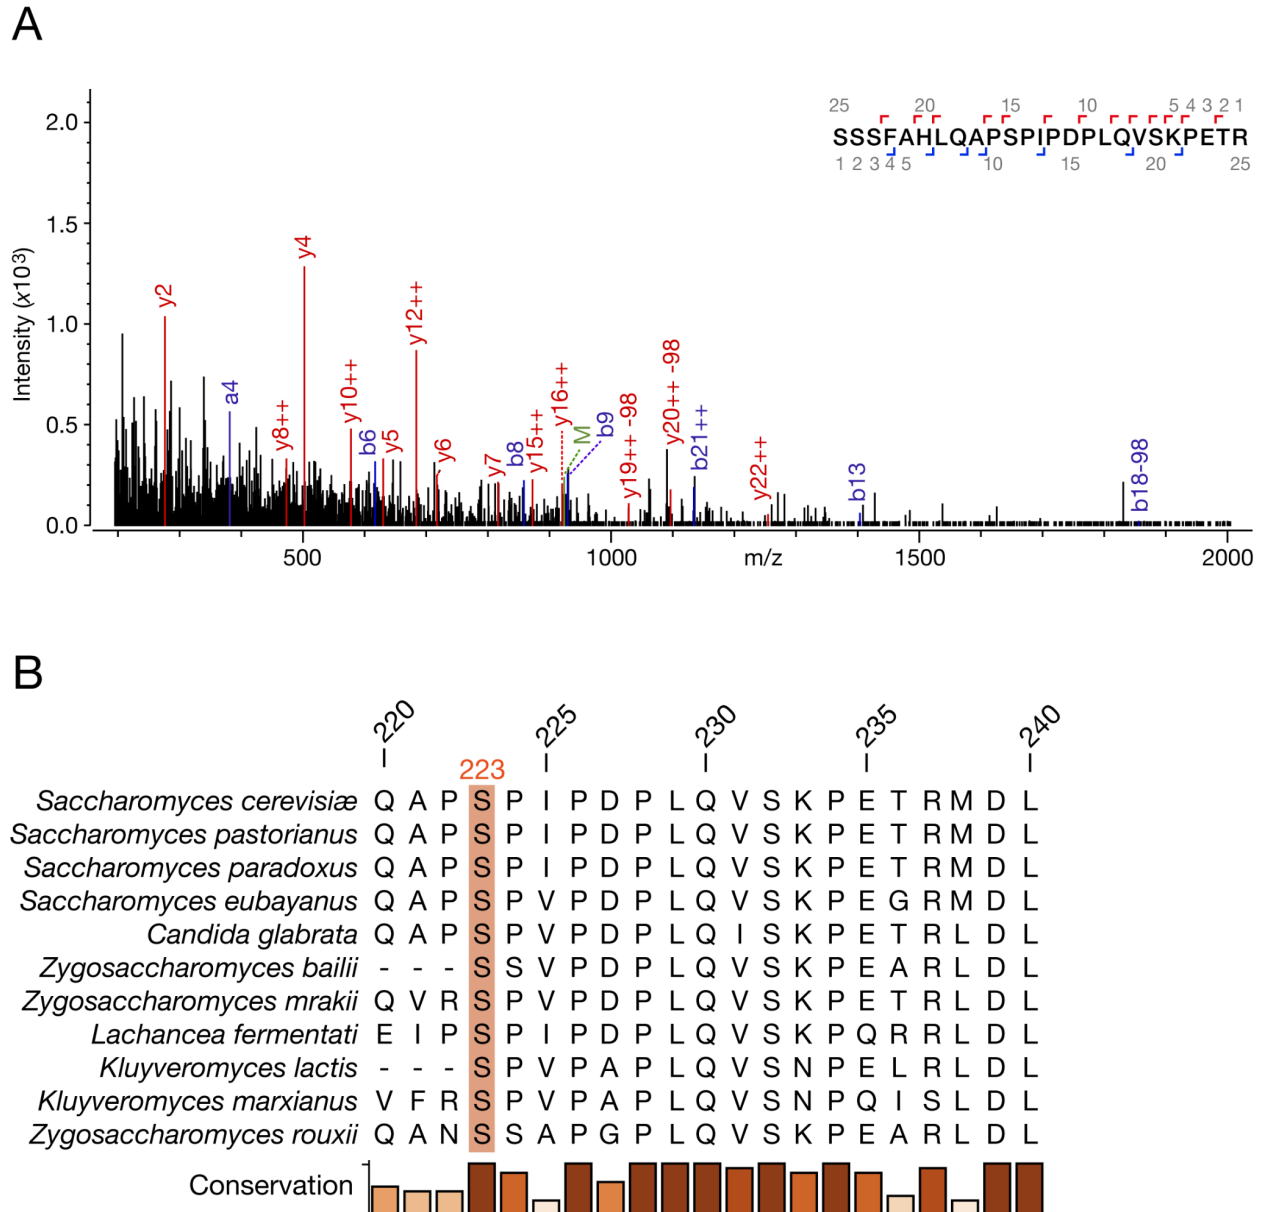

**Figure S3 - Hsp42 S223 phosphorylation, related to figure 4.**

A) MS spectra example of phosphorylated S223 peptide on Hsp42.

B) Multiple Sequence Alignment of Hsp42 orthologs. Numbers on top refer to residue position in the *S. cerevisiae* protein. S223 is underlined in orange. Relative conservation is shown with the bars at the bottom. Only a small portion of the sequences are shown.

**Table S1**

Primers used in this study

| Name                                      | Sequence                                                                  | Description                                                                   |
|-------------------------------------------|---------------------------------------------------------------------------|-------------------------------------------------------------------------------|
| <b>Site-directed mutagenesis on Hsp42</b> |                                                                           |                                                                               |
| CLO5-97                                   | AAGCGCCTGCCCAATACC                                                        | HSP42 S223A up                                                                |
| CLO5-98                                   | GGTATTGGGGCAGGCGCTT                                                       | HSP42 S223A down                                                              |
| CLO6-1                                    | AAGCGCCTGAACCAATACC                                                       | HSP42 S223E up                                                                |
| CLO6-2                                    | GGTATTGGTTCAGGCGCTT                                                       | HSP42 S223E down                                                              |
| <b>HSP42 deletion</b>                     |                                                                           |                                                                               |
| CLO6-5                                    | GTCCATATCCCACACAAATTAAGATCATACCAAGCCGAAGC<br>cagctgaag<br>cttcgtacgc      | Forward amplification of lox-KANMX-lox cassette (pUG6) for HSP42 (YDR171W) KO |
| CLO6-6                                    | CATTCGTTGTATGATTTTTGTGTGGTTGACAGATATTCTGCCG<br>gcataggc<br>cactagtggatctg | Reverse amplification of lox-KANMX-lox cassette (pUG6) for HSP42 (YDR171W) KO |
| <b>Rescue Hsp42 expression</b>            |                                                                           |                                                                               |
| CLO6-7                                    | CCATATCCCACACAAATTAAGATCATACCAAGCCGAAGCAATGAGTTT<br>TTATCAACCATCCC        | Forward amplification of 40pb promoter + Hsp42 for integration                |
| CLO6-8                                    | attcttcacctttagaATTTTCTACCGTAGGGTTGGGATTTTC                               | Reverse amplification of                                                      |

|                                                  |                                                                |                                                         |
|--------------------------------------------------|----------------------------------------------------------------|---------------------------------------------------------|
|                                                  |                                                                | Hsp42 no stop fused to EGFP                             |
| CLO6-11                                          | GCACCACAAAATAAATAATCTGAACtctaaaggtgaagaattattc                 | Forward amplification of Hsp42 for cloning in pYM25     |
| CLO6-12                                          | CGTACACACGTAAATATATTCgcagtatagcgaccagcattc                     | Reverse amplification of pYM25 for cloning of Hsp42     |
| CLO6-9                                           | CCCTACGGTAGAAAATtctaaaggtgaagaattattcactgg                     | Forward amplification EGFP (pYM25) fused to Hsp42       |
| <b>C-terminal tagging at native genomic loci</b> |                                                                |                                                         |
| CLOP194-B10                                      | CTAAACCCTGTTGGTGTTCCAAATGATGACCACCATCACgtgagcaagggcgaggagg     | forward to tag ACC1 (YNR016C) (cerevisiae) with mCherry |
| CLOP194-E10                                      | GGTAAAAAGTAAAAGAGAAACAGAAGGGCAACTTGAATGgtggatctgatatcatcgatg   | reverse to tag ACC1 (YNR016C) cerevisiae (pYM27, pBS35) |
| CLOP258-A3                                       | TATCTACCGATGATAAAGAAAAATTGTTGAAGACTTTGAAAtctaaaggtgaagaattattc | F to tag ACC1 (YNR016C) with eGFP (pKT127)              |
| CLOP258-B3                                       | GATGATGGAAGCGCTCAAACAGATCCTTCAGAGTACTTGGgcagtatagcgaccagcattc  | R to tag ACC1 (YNR016C) with eGFP (pKT127)              |
| CLOP258-E3                                       | GTAAGTACGATCTTGAGGCCGGCGAAAACAAATTCAACTTTtctaaaggtgaagaattattc | F to tag URA7 (YBL039C) with eGFP (pKT127)              |
| CLOP258-F3                                       | GTTTCATGTCATCACCTACAATCGACTTCAACTCGAAGAGTgcagtatagcgaccagcattc | R to tag URA7 (YBL039C) with                            |

|                                                           |                                                                           |                                                                                              |
|-----------------------------------------------------------|---------------------------------------------------------------------------|----------------------------------------------------------------------------------------------|
|                                                           |                                                                           | eGFP (pKT127)                                                                                |
| CLOP258-A4                                                | GGTTCCGGAGTGGGTGCCGCCTTGTGTGCGCTTGTAGCAAtctaaaggtga<br>agaattattc         | F to tag GLK1 (YCL040W) with eGFP (pKT127)                                                   |
| CLOP258-B4                                                | GGAGAGAAGATGGTAAGTACGGTGGGATACGTACACAAACgagctata<br>gcgaccagcattc         | R to tag GLK1 (YCL040W) with eGFP (pKT127)                                                   |
| CLOP273-D2                                                | GATGATGGAAGCGCTCAAACAGATCCTTCAGAGTACTTGGGGACCTA<br>GACTTCAGGTTGTC         | R to tag ACC1 (YNR016C) with eGFP (pYM25)                                                    |
| CLOP273-F2                                                | GTTTCATGTCATCACCTACAATCGACTTCAACTCGAAGAGTGGACCTAG<br>ACTTCAGGTTGTC        | R to tag URA7 (YBL039C) with eGFP (pYM25)                                                    |
| CLOP273-H2                                                | GGAGAGAAGATGGTAAGTACGGTGGGATACGTACACAAACGGACCT<br>AGACTTCAGGTTGTC         | R to tag GLK1 (YCL040W) with eGFP (pYM25)                                                    |
| CLO6-10                                                   | CGCAGCTAATGCGAAACAAAGAAATGAAGCATATACCATTTCgcatgaa<br>ttcgagctcgtttaaactgg | Reverse amplification EGFP-TERM-KAN MX cassette (pYM25) to integrate at HSP42 (YDR171W) loci |
| <b>Molecular probes (<math>\mu</math>NS and pHluorin)</b> |                                                                           |                                                                                              |
| CLOP228-A2                                                | CAATGTATCTTAccagcttttgtcccttagtgaggg                                      | Forward amplification pRS vector                                                             |
| CLOP228-B2                                                | TTAGTCGATGCCcccgggtacccaattcgcctatag                                      | reverse amplification pRS vector + SOD1p (YJR104C)                                           |
| CLOP228-D2                                                | gggtaccgggGGCATCGACTAAAATTGCATCGTTG                                       | F sod1 (YJR104C) prom to clone in pRS                                                        |

|            |                                                                    |                                                                                               |
|------------|--------------------------------------------------------------------|-----------------------------------------------------------------------------------------------|
| CLOP228-E2 | gaatgaagccatCGATTTGTATTTTATTTACGTGC                                | R sod1 (YJR104C)<br>prom to clone<br>upstream - $\mu$ NS                                      |
| CLOP228-H2 | aaatacaaatcgATGGCTTCATTCAAGGGATTCTCCGC                             | Forward $\mu$ NS<br>downstream<br>sod1p (YJR104C)                                             |
| CLOP228-B3 | aacaaaagctggTAAGATACATTGATGAGTTTGGAC                               | rev $\mu$ NS-EGFP                                                                             |
| CLOP239-A3 | gggtaccgggCTCGCTGAACTTGTCCTTACCGACGG                               | F to clone -850<br>sod1_cer<br>promotor in pRS                                                |
| CLOP239-B3 | gaatgaagccatTATAAATTAATTATGTTTTATTTGTTTGC GCGATTGC                 | R to clone<br>sod1_cer prom<br>(from -1)<br>upstream $\mu$ NS                                 |
| CLOP239-C3 | ttaattataATGGCTTCATTCAAGGGATTCTCCGC                                | F to clone $\mu$ NS<br>downstream -1<br>sod1_cer                                              |
| CLOP239-D3 | G TTCAGCGAGcccggtagccaattcgcctatag                                 | R to amplify pRS<br>with -850<br>sod1_cer                                                     |
| CLOP247-H6 | CCCAGTATTCTTAACCCAACTGCACAGAACAAAAACCTGCagcttgctcgt<br>tccccgccggg | Forward to<br>integrate<br>HYG_sod1P_ $\mu$ NS<br>_EGFP (pYM25) at<br>Ura3 (YEL021W)<br>locus |
| CLOP247-A7 | GTGAGTTTAGTATACATGCATTTACTTATAATACAGTTTTtacttgtagc<br>tcgtccatgc   | reverse to<br>integrate<br>HYG_sod1P_ $\mu$ NS<br>_EGFP (pYM25) at<br>Ura3 (YEL021W)<br>locus |

|                                  |                                                               |                                                                                |
|----------------------------------|---------------------------------------------------------------|--------------------------------------------------------------------------------|
| CLOP249-A2                       | GACGCTCGAAGccagcttttgttcccttttagtgaggg                        | forward to amplify pYM25 for gibson cloning with sfpHluorin                    |
| CLOP249-B2                       | ctttgctcatTATAAATTAATTATGTTTTATTTGTTTGCGCGATTGC               | reverse to amplify pYM25_sod1_promoter to clone sfpHluorin downstream promoter |
| CLOP249-C2                       | CATAATTAATTTATAatgagcaaaggagaagaacttttc                       | forward to amplify sfpHluorin to clone downstream sod1 promoter                |
| CLOP249-D2                       | AACAAAAGCTGGcttcgagcgtcccaaaccttc                             | reverse to amplify sfpHluorin to clone in pRS                                  |
| CLOP249-G2                       | GTGAGTTTAGTATACATGCATTTACTTATAATACAGTTTTcttcgagcgtcccaaaccttc | reverse to integrate HYG_sod1P_sfpHluorin (pYM25) at Ura3 (YEL021W) locus      |
| CLOP253-C6                       | CATGAAATTGCCAGTATTCTTAACCCAAGTGCcatttgcaccatacattttgatggcc    | Forw integration pHluorin to URA3 (YEL021W) locus                              |
| CLOP253-F6                       | GTTTAGTATACATGCATTTACTTATAATACAGttattttagagctcatccatgccatg    | Rev integration pHluorin to URA3 (YEL021W) locus                               |
| <b>Validation and sequencing</b> |                                                               |                                                                                |
| CLOP256-C9                       | GTTCTGGAAGGTTTCGCGAATTG                                       | Forward KO check                                                               |
| CLOP256-                         | ctgctcgaggtctgcagcgagg                                        | Reverse KO check                                                               |

|                   |                                 |                               |
|-------------------|---------------------------------|-------------------------------|
| <b>D9</b>         |                                 |                               |
| <b>CLOP250-D7</b> | <b>GTTTAGCTGTA ACTATGTTGCGG</b> | <b>SOD1 prom -100 for seq</b> |
| <b>CLOP250-E7</b> | <b>ccttttcggttagagcggatgtgg</b> | <b>CYC1 term +100 for seq</b> |
| <b>CLOP258-C4</b> | <b>CGTGGTACCCTGCTTCAGTGGACC</b> | <b>oligo C ACC1 (YNR016C)</b> |
| <b>CLOP258-E4</b> | <b>GGTAAGGACGACACTGGAAAGCG</b>  | <b>oligo C URA7 (YBL039C)</b> |
| <b>CLOP258-G4</b> | <b>GTGAAGTCGAGATCGGTTGTGATG</b> | <b>oligo C GLK1 (YCL040W)</b> |



**Table S2**

Pindex values at indicated time-point during germination and in vegetatively growing cells.

| Protein         | Pindex     |            |            |            |                  |
|-----------------|------------|------------|------------|------------|------------------|
| Systematic name | 0h         | 1h         | 3h         | 6h         | vegetative cells |
| CON__P00761     | 0.44649274 | 0.31128444 | 0.40430669 | 0.48123797 | 0.555981157      |
| CON__P08779     | 0.70775555 | 0.29725873 | 0.49761323 | 0.4333803  | 0.734509032      |
| CON__P35527     | 0.60567557 | 0.2844409  | 0.41124666 | 0.37224188 | 0.529706682      |
| CON__P35908v2   | 0.50507366 | 0.34537628 | 0.41173599 | 0.41876572 | 0.382999348      |
| CON__Q04695     | 0.86379046 | 0.3675856  | 0.31372998 | 0.27394323 | 0.643764902      |
| YAL003W         | 0.33483348 | 0.25533162 | 0.31925034 | 0.46049299 | 0.315911422      |
| YAL005C         | 0.21945126 | 0.18832197 | 0.18530921 | 0.64456277 | 0.200656213      |
| YAL012W         | 0.04410389 | 0.07951884 | 0.03860619 | 0.06325469 | 0.069915642      |
| YAL016W         | 0.61410372 | 0.37593279 | 0.244234   | 0.25185204 | 0.253032038      |
| YAL025C         | 1          | 0.52454417 | 1          | 0.98902062 | 0.834010926      |
| YAL035W         | 0.91236418 | 0.8844249  | 0.85525553 | 0.86436319 | 0.824732227      |
| YAL038W         | 0.74825732 | 0.41552458 | 0.40214569 | 0.13089211 | 0.399792677      |
| YAL043C         | 0.99390408 | 1          | 0.94543868 | 0.96774365 | 0.889246444      |
| YAL049C         | 0.00773975 | 0.04387666 | 0.00935912 | 0.03131348 | 0.071512226      |
| YAL054C         | 0.56520666 | 0.50980753 | 0.4453242  | 0.2928999  | 0.686748634      |
| YAL060W         | 0.04165426 | 0.15037505 | 0.05499783 | 0.09453735 | 0.084386059      |
| YAR002C-A       | 0.89168735 | 0.80260029 | 1          | 1          | 0.990273682      |
| YAR007C         | 0          | 0.04605261 | 0.10444699 | 0.113771   | 0.101953922      |
| YAR015W         | 0.09982522 | 0.07635914 | 0.03417635 | 0.05635284 | 0.063844928      |
| YBL004W         | 1          | 0.91957195 | 0.97551014 | 0.99046252 | 0.98306422       |
| YBL015W         | 0.43121976 | 0.41367719 | 0.50386908 | 0.58694377 | 0.731044191      |

|           |            |            |            |            |             |
|-----------|------------|------------|------------|------------|-------------|
| YBL017C   | 0.98040161 | 0.88440738 | 1          | 0.95482469 | 1           |
| YBL024W   | 0.132439   | 0.15451424 | 0.01047809 | 0.06469429 | 0.028753854 |
| YBL026W   | 0.87085761 | 0.47935758 | 0.48813462 | 0.48124558 | 0.576804795 |
| YBL036C   | 0.0053118  | 0.04215186 | 0          | 0.02890359 | 0.108612113 |
| YBL039C   | 0.78178556 | 0.6121169  | 0.36433411 | 0.15088733 | 0.144611002 |
| YBL041W   | 0.1711052  | 0.23363467 | 0.06114067 | 0.0501647  | 0.11204643  |
| YBL045C   | 0.76593793 | 0.79842009 | 0.82507854 | 0.80077656 | 0.814597956 |
| YBL050W   | 0.79281123 | 0.65446347 | 0.86645521 | 0.9134249  | 0.975061344 |
| YBL056W   | 0.59008016 | 0.655708   | 0          | 0.14929928 | 0           |
| YBL058W   | 0.11310906 | 0.06076359 | 0          | 0.05599082 | 0.038200317 |
| YBL064C   | 0.37294764 | 0.30036821 | 0.18090971 | 0.1874285  | 0.316348617 |
| YBL075C   | 0.44535642 | 0.26091698 | 0.25190948 | 0.23598042 | 0.940606368 |
| YBL076C   | 0.38199256 | 0.20015304 | 0.10344669 | 0.13792019 | 0.259505008 |
| YBL092W   | 0.87436142 | 0.91707997 | 0.84121471 | 0.7651759  | 0.600270001 |
| YBL099W   | 0.77069855 | 0.69246024 | 0.65218988 | 0.6076221  | 0.745423818 |
| YBR001C   | 0.79575347 | 0.54598393 | 0.30757916 | 0.19451316 | 0.373884086 |
| YBR011C   | 0.09657142 | 0.11757775 | 0.03669902 | 0.06265643 | 0.050322253 |
| YBR015C   | 1          | 0.85779481 | 0.85514825 | 0.86483231 | 0.819181518 |
| YBR025C   | 0.86472609 | 0.43926287 | 0.49026698 | 0.434375   | 0.357911999 |
| YBR039W   | 0.94846757 | 0.94012684 | 0.96565205 | 0.91303578 | 0.991814674 |
| YBR078W   | 0.26800799 | 0.30202208 | 0.52070068 | 0.8287967  | 0.904737272 |
| YBR079C   | 0.95722376 | 0.8242318  | 0.88905626 | 0.80776128 | 0.80638378  |
| YBR084W   | 0.85919524 | 0.90265676 | 0.97753366 | 0.90068394 | 0.842040317 |
| YBR087W   | 1          | 1          | 1          | 0.89758438 | 0.950009968 |
| YBR088C   | 0.01215203 | 0.0571025  | 0.01165576 | 0.00739966 | 0.042578745 |
| YBR089C-A | 0.60183628 | 0.62280786 | 0.52107595 | 0.56676699 | 0.369050091 |
| YBR094W   | 0.24925825 | 0.37053217 | 0.03683753 | 0.25924149 | 0.087664834 |

|         |            |            |            |            |             |
|---------|------------|------------|------------|------------|-------------|
| YBR101C | 0.6982609  | 0.58589689 | 0.30875016 | 0.27611464 | 0.186070032 |
| YBR106W | 0.91998997 | 0.91136652 | 1          | 1          | 1           |
| YBR109C | 0.53232225 | 0.66007706 | 0.43385648 | 0.43113022 | 0.342924176 |
| YBR111C | 0.30256508 | 0.26576518 | 0.07293678 | 0.05570606 | 0.10530896  |
| YBR112C | 0.71609689 | 0.75678188 | 0.20154218 | 0.04675914 | 0           |
| YBR115C | 0.0404644  | 0.02504774 | 0          | 0.03226828 | 0.018373298 |
| YBR121C | 0.31004777 | 0.1134969  | 0.09001346 | 0.16318818 | 0.168230788 |
| YBR126C | 0.16335842 | 0.12090812 | 0.13824235 | 0.10812091 | 0.272744483 |
| YBR127C | 0.84346454 | 0.83179217 | 0.79369736 | 0.74116963 | 0.796229867 |
| YBR140C | 0.96617781 | 0.97814179 | 1          | 1          | 1           |
| YBR143C | 0.69214767 | 0.58892871 | 0.51878972 | 0.66689485 | 0.627459756 |
| YBR146W | 1          | 0.83727271 | 1          | 1          | 0.666625786 |
| YBR149W | 0.04474086 | 0.05450444 | 0.02237537 | 0.02270145 | 0.048774991 |
| YBR154C | 0.62033293 | 0.75367432 | 0.71126735 | 0.60614446 | 0.675568947 |
| YBR164C | 0.9433279  | 0.76696415 | 0          | 0.58673301 | 0.564964399 |
| YBR166C | 1          | 0.9804613  | 0.86359633 | 0.79183028 | 1           |
| YBR191W | 0.90298831 | 0.93256618 | 0.89264192 | 0.77210022 | 0.749048561 |
| YBR196C | 0.05034515 | 0.11264977 | 0.02563034 | 0.05352399 | 0.083057298 |
| YBR198C | 1          | 0.78852505 | 0.78827557 | 0.90246404 | 1           |
| YBR218C | 0.50530186 | 0.43231662 | 0.29287456 | 0.44747305 | 0.514518342 |
| YBR221C | 0.78762334 | 0.75811184 | 0.85218671 | 0.87814685 | 0.961489859 |
| YBR222C | 0.02759917 | 0.12153594 | 0.05311911 | 0.12923374 | 0.491005355 |
| YBR245C | 1          | 0.81437219 | 0.98689055 | 0.71507906 | 0.729532123 |
| YBR247C | 0.92357562 | 0.66617749 | 0.5605413  | 0.76544947 | 0.851108167 |
| YBR248C | 0.0240767  | 0.08169108 | 0          | 0.01377634 | 0.03855732  |
| YBR249C | 0.59006642 | 0.29710993 | 0.23118736 | 0.37949854 | 0.294959481 |
| YBR256C | 0          | 0          | 0          | 0          | 0           |

|         |            |            |            |            |             |
|---------|------------|------------|------------|------------|-------------|
| YBR263W | 0.6995731  | 0.82468481 | 0.74464549 | 0.76814972 | 0.8524565   |
| YBR286W | 0.07928795 | 0.14276605 | 0.0554474  | 0.08136698 | 0           |
| YCL011C | 0.37177429 | 0.36829098 | 0.38231401 | 0.28194134 | 0.201479866 |
| YCL017C | 0.9025791  | 0.73676915 | 0.80301877 | 0.74418001 | 0.546172509 |
| YCL030C | 0.46969892 | 0.07795779 | 0.19360007 | 0.21306047 | 0.336685382 |
| YCL035C | 0.05035752 | 0.09337738 | 0          | 0.0331771  | 0           |
| YCL040W | 0.17510338 | 0.5443327  | 0.58984893 | 0.64256626 | 0.441673944 |
| YCL043C | 0.20457833 | 0.16031443 | 0.10563908 | 0.20514929 | 0.070761124 |
| YCL050C | 0.33045551 | 0.1744834  | 0.03705753 | 0.04501843 | 0.100583527 |
| YCL054W | 1          | 0.86150684 | 0.94754589 | 0.83320687 | 0.935545763 |
| YCL057W | 0.31470575 | 0.1652987  | 0.04199831 | 0          | 0.024925103 |
| YCR002C | 0.85838557 | 0.67313058 | 0.69304333 | 0.82312946 | 0.739348958 |
| YCR004C | 0.73831194 | 0.87155336 | 0.92143297 | 1          | 0.955682956 |
| YCR009C | 0.93896639 | 0.97958103 | 0.93221344 | 0.89134249 | 0.919328373 |
| YCR012W | 0.10273251 | 0.17704078 | 0.09853541 | 0.13033229 | 0.169465471 |
| YCR030C | 0.85777337 | 0.88470449 | 0.87713351 | 0.86097468 | 0.921895924 |
| YCR046C | 0.94265321 | 0.98974295 | 0.97589915 | 0.81401528 | 1           |
| YCR052W | 1          | 0.7053465  | 0.93987542 | 0.8870685  | 0.5         |
| YCR053W | 0.11394502 | 0.05421619 | 0.02646195 | 0.01508436 | 0.046213793 |
| YCR057C | 1          | 0.87484263 | 0.94813408 | 0.95526605 | 0.869081708 |
| YCR077C | 1          | 0.80280173 | 0.78849059 | 0.62187434 | 0.532566227 |
| YCR083W | 0.02228207 | 0.18192039 | 0          | 0          | 0           |
| YCR084C | 0.22395589 | 0.09963356 | 0.04512387 | 0.05611725 | 0           |
| YCR088W | 0.05196887 | 0.08262694 | 0          | 0.01066828 | 0.000867577 |
| YCR093W | 0.95934805 | 0.71567373 | 0.90699318 | 0.94444024 | 0.854855547 |
| YDL007W | 0.95854853 | 0.90458569 | 0.82857946 | 0.87735497 | 0.91408629  |
| YDL014W | 0.99181221 | 0.9571691  | 0.94550237 | 0.80034269 | 0.832858223 |

|         |            |            |            |            |             |
|---------|------------|------------|------------|------------|-------------|
| YDL022W | 0.19735122 | 0.21580722 | 0.10534509 | 0.11740158 | 0.127429335 |
| YDL029W | 0.75010506 | 0.73198004 | 0.60972401 | 0.5334037  | 0.703635899 |
| YDL040C | 0.98293775 | 0.86113864 | 0.94916908 | 0.82400729 | 0.731973456 |
| YDL047W | 0.79243451 | 0.37507693 | 0.4410093  | 0.39941642 | 0.261976873 |
| YDL051W | 0.25043919 | 0.15455428 | 0.08163515 | 0.2004278  | 0.100237263 |
| YDL055C | 0.67444072 | 0.65011548 | 0.38322391 | 0.48929237 | 0.596525993 |
| YDL060W | 1          | 1          | 0.91403503 | 0.85033106 | 0.772388038 |
| YDL061C | 1          | 0.98484937 | 0.83513426 | 0.66204653 | 0.553930932 |
| YDL066W | 0.11418949 | 0.0869523  | 0.2831867  | 0.50290144 | 0.602347932 |
| YDL075W | 0.81602309 | 0.82962221 | 0.64117796 | 0.65433821 | 0.533863785 |
| YDL078C | 0.68899278 | 0.73315737 | 0.81205831 | 0.62786364 | 0.800909196 |
| YDL084W | 0.17789248 | 0.15282238 | 0.10651558 | 0.09819677 | 0.196242637 |
| YDL124W | 0.03417948 | 0.03416949 | 0.02161318 | 0.01685577 | 0.071553102 |
| YDL125C | 0.06881086 | 0.061804   | 0.02293208 | 0.01597119 | 0.037348668 |
| YDL126C | 0.25841573 | 0.2663973  | 0.1851225  | 0.250449   | 0.255666064 |
| YDL130W | 0.80401826 | 0.7534291  | 0.79065713 | 0.69477008 | 0.651926846 |
| YDL131W | 0.49058335 | 0.2932917  | 0.38258417 | 0.30783328 | 0.354206407 |
| YDL137W | 0.86756079 | 0.96337021 | 0.68915621 | 0.77669573 | 0.774628804 |
| YDL140C | 0.25362606 | 0.44854088 | 0.35719917 | 0.15173814 | 0.438393381 |
| YDL143W | 0.97296518 | 0.80715599 | 0.86057419 | 0.86050485 | 0.931877644 |
| YDL145C | 0.85039996 | 0.65139804 | 0.81757171 | 0.63335504 | 0.811463376 |
| YDL147W | 0.85357793 | 0.55306581 | 0.47178742 | 0.58808586 | 0.789729888 |
| YDL148C | 1          | 0.90394794 | 0.99331705 | 0.99107456 | 0.986402884 |
| YDL160C | 0.94007768 | 0.8528802  | 0.85975532 | 0.75680305 | 0.762212847 |
| YDL168W | 0.07019067 | 0.13531166 | 0.03403163 | 0.03043677 | 0.071980962 |
| YDL171C | 0.53721489 | 0.44590333 | 0.36963155 | 0.59999096 | 0.660824131 |
| YDL178W | 0.39848781 | 0.08505431 | 0.20902405 | 0.04968683 | 0           |

|         |            |            |            |            |             |
|---------|------------|------------|------------|------------|-------------|
| YDL185W | 0.49516748 | 0.36549651 | 0.22382673 | 0.25392982 | 0.364735742 |
| YDL192W | 0.91011713 | 0.75769798 | 0.54331334 | 0.59065823 | 0.515135097 |
| YDL195W | 0.6112483  | 0.24709874 | 0.15036454 | 0.36129034 | 0.629262385 |
| YDL201W | 0.14934676 | 0.29849457 | 0.03079227 | 0.01895463 | 0.023781516 |
| YDL202W | 1          | 0.94515921 | 1          | 0.90941011 | 0.912404715 |
| YDL213C | 0          | 0.14159648 | 0.44923706 | 0.61353891 | 0.305889192 |
| YDL215C | 0.91601148 | 0.7527834  | 0.6613183  | 0.59848905 | 0.817656655 |
| YDL225W | 1          | 0.18031302 | 0.74894808 | 0.76933634 | 0.749827299 |
| YDL229W | 0.4013291  | 0.34900802 | 0.35975932 | 0.4135175  | 0.476398044 |
| YDR001C | 0.56100717 | 0.44322921 | 0.56745005 | 0.44978562 | 0.46132622  |
| YDR002W | 0.1053619  | 0.08241233 | 0.00327535 | 0.01099617 | 0.056937046 |
| YDR019C | 0.14644287 | 0.1096071  | 0.01905897 | 0.11749245 | 0.388389792 |
| YDR021W | 1          | 1          | 0.9740467  | 0.8340355  | 1           |
| YDR023W | 0.07357134 | 0.07203557 | 0.08332178 | 0.1762542  | 0.23066703  |
| YDR032C | 0.36377512 | 0.32023726 | 0.2531347  | 0.30057073 | 0.637792261 |
| YDR035W | 0.21841803 | 0.1307504  | 0.08690276 | 0.17741194 | 0.248165418 |
| YDR037W | 0.3366452  | 0.27229704 | 0.18471177 | 0.17190169 | 0.11760513  |
| YDR050C | 0.13736816 | 0.16800909 | 0.0934464  | 0.06023959 | 0.066396534 |
| YDR060W | 1          | 0.97139927 | 0.97663692 | 0.82449923 | 0.93590929  |
| YDR064W | 0.87777012 | 0.91789368 | 0.90058306 | 0.70618291 | 0.691935869 |
| YDR071C | 0.23653237 | 0.17378711 | 0.09208203 | 0.11382641 | 0.142907609 |
| YDR074W | 0.51746981 | 0.30253958 | 0.30802394 | 0.11848194 | 0.068596735 |
| YDR087C | 0.92724854 | 0.83889457 | 0.98465776 | 0.94128896 | 0.837029463 |
| YDR091C | 0.92274796 | 0.7446375  | 0.86398122 | 0.78927142 | 0.706049435 |
| YDR098C | 0.03322066 | 0.08597323 | 0.07587628 | 0.13839698 | 0.063371903 |
| YDR099W | 0.16123153 | 0.14928637 | 0.05927972 | 0.12126387 | 0.134012578 |
| YDR101C | 0.94630542 | 0.81072415 | 0.84683178 | 0.7693049  | 0.677201453 |

|         |            |            |            |            |             |
|---------|------------|------------|------------|------------|-------------|
| YDR117C | 1          | 0.91923175 | 0.96046584 | 1          | 1           |
| YDR120C | 0.90023593 | 0.22463498 | 1          | 0.96217778 | 0.860231014 |
| YDR127W | 0.19149904 | 0.39122087 | 0.19894631 | 0.33136735 | 0.643488492 |
| YDR129C | 0.49746768 | 0.28063481 | 0.12324965 | 0.11614585 | 0.169634167 |
| YDR141C | 0.79226424 | 0.9691648  | 0.98268675 | 0.96882432 | 0.923237753 |
| YDR148C | 0.82898971 | 0.80614534 | 0.92673909 | 0.77957664 | 0.832176053 |
| YDR150W | 0.92881847 | 0.63656421 | 1          | 0.90993569 | 0.792375876 |
| YDR155C | 0.07742462 | 0.13566693 | 0.04091022 | 0.07167524 | 0.060378874 |
| YDR158W | 0.28448266 | 0.13182166 | 0.05790065 | 0.08953111 | 0.168543282 |
| YDR164C | 0.93631163 | 1          | 0.99526913 | 0.86185913 | 0.963792499 |
| YDR165W | 0.16205947 | 0.23560956 | 0          | 0.06050003 | 0           |
| YDR166C | 1          | 0.85735234 | 0.87432867 | 0.91538495 | 0.914511122 |
| YDR168W | 0.17217373 | 0.0211452  | 0.07115828 | 0.0209629  | 0           |
| YDR170C | 0.94519307 | 0.5663327  | 0.65514803 | 0.75588718 | 0.889049151 |
| YDR171W | 0.92101602 | 0.29186242 | 0.78286773 | 0.71607908 | 0.738330096 |
| YDR172W | 0.90900152 | 0.80245392 | 0.61642873 | 0.85820472 | 0.735167716 |
| YDR174W | 0.84935983 | 0.82833811 | 0.90632929 | 0.75861254 | 0.798839478 |
| YDR175C | 0.90042574 | 0.93062609 | 0.98954108 | 0.67566544 | 0.858312985 |
| YDR176W | 1          | 0.90488266 | 0.83791016 | 1          | 0.869334085 |
| YDR188W | 0.9704484  | 0.91162597 | 0.76450628 | 0.80498543 | 0.894066157 |
| YDR190C | 0.87118025 | 0.87529909 | 0.62055268 | 0.69856935 | 0.732276441 |
| YDR194C | 1          | 0.96484565 | 1          | 0.93997535 | 0.813140335 |
| YDR211W | 1          | 0.77431705 | 0.86840503 | 0.72896557 | 0.965721558 |
| YDR212W | 0.88988908 | 0.80814997 | 0.76351544 | 0.78156593 | 0.822873237 |
| YDR214W | 0.12183568 | 0.0425831  | 0.01615496 | 0.14585145 | 0.2048823   |
| YDR226W | 0.04132121 | 0.04550139 | 0.01648787 | 0.06906812 | 0.051955435 |
| YDR233C | 0.91588712 | 0.9893715  | 0.97918336 | 0.93843027 | 0.955473035 |



|         |            |            |            |            |             |
|---------|------------|------------|------------|------------|-------------|
| YDR234W | 0.87916969 | 0.23161585 | 0.17377074 | 0.29520053 | 0.439817836 |
| YDR238C | 0.92043655 | 0.83897781 | 0.83688223 | 0.6875045  | 0.910093345 |
| YDR258C | 0.26210255 | 0.10905208 | 0.10454682 | 0          | 0           |
| YDR289C | 0.8226575  | 0.79275365 | 0.88577558 | 0.84041964 | 1           |
| YDR293C | 0.81962087 | 0.84123906 | 0.80580959 | 0.61979508 | 0.601059725 |
| YDR296W | 1          | 0.9397918  | 0.9364142  | 0.85241886 | 1           |
| YDR298C | 0.66024808 | 0.48302196 | 0.48179478 | 0.49608792 | 0.530088125 |
| YDR301W | 1          | 1          | 1          | 1          | 1           |
| YDR303C | 0.95350747 | 0.91850133 | 0.9720246  | 0.93266071 | 0.449592681 |
| YDR304C | 0          | 0          | 0          | 0          | 0           |
| YDR322W | 0.88771584 | 0.96482112 | 0.98737881 | 0.92988975 | 0.479028572 |
| YDR324C | 1          | 0.93910048 | 0.96489109 | 0.88853366 | 0.585435147 |
| YDR341C | 0.32932156 | 0.14460352 | 0.09974062 | 0.16665699 | 0.22781646  |
| YDR353W | 0.10025612 | 0.01820677 | 0.04551427 | 0.05324741 | 0.098363703 |
| YDR368W | 0.04668893 | 0.17076223 | 0.00179675 | 0          | 0.027115393 |
| YDR381W | 0.85721386 | 0.9011443  | 0.87443307 | 0.69254609 | 0.631350439 |
| YDR382W | 0.8805624  | 0.82147977 | 0.83762119 | 0.75970415 | 0.698902588 |
| YDR388W | 0.94342433 | 0.99186093 | 0.98818326 | 0.86439662 | 0.903317572 |
| YDR394W | 0.89256074 | 0.88931037 | 0.92847438 | 0.78318081 | 0.877943994 |
| YDR395W | 0.96536642 | 0.87001664 | 0.96537905 | 0.87509738 | 0.934106389 |
| YDR399W | 0.03194138 | 0.03042963 | 0          | 0.07879671 | 0.012097346 |
| YDR408C | 0          | 0.04557037 | 0          | 0          | 0.116414139 |
| YDR427W | 0.73204468 | 0.53027428 | 0.49837611 | 0.67264182 | 0.807005798 |
| YDR429C | 0.91783773 | 0.52151088 | 0.79168394 | 0.72902398 | 0.774737438 |
| YDR430C | 0.24867992 | 0.22491806 | 0.10062956 | 0.03223394 | 0.127698955 |
| YDR432W | 0.26741016 | 0.32021961 | 0.3762028  | 0.39684415 | 0.414625808 |
| YDR449C | 1          | 0.97256784 | 0.98755953 | 0.93655694 | 0.991099311 |

|         |            |            |            |            |             |
|---------|------------|------------|------------|------------|-------------|
| YDR454C | 0.03719409 | 0.01504838 | 0.02366859 | 0.0139615  | 0.008849708 |
| YDR457W | 0.93603026 | 0.65811802 | 0.51512466 | 0.78948694 | 0.84810566  |
| YDR472W | 1          | 0.85263786 | 0.74789764 | 1          | 0.891871905 |
| YDR483W | 0.83043716 | 1          | 0.96201184 | 0.98448063 | 1           |
| YDR496C | 0.99950044 | 0.81471878 | 0.93319341 | 0.7718576  | 0.875118882 |
| YDR502C | 0.73517057 | 0.52161478 | 0.10750659 | 0.36494376 | 0.333814662 |
| YDR513W | 0.07174692 | 0.11741435 | 0.04320037 | 0.17092781 | 0.040441905 |
| YDR516C | 0.19454234 | 0.17740934 | 0.0860795  | 0.06716275 | 0.111172521 |
| YDR533C | 0.08551873 | 0.09119116 | 0.01059693 | 0.02240844 | 0.090301429 |
| YEL002C | 0.92819276 | 0.94022831 | 0.97762425 | 0.96389854 | 0.973508104 |
| YEL011W | 0.03611301 | 0.0555495  | 0.00403921 | 0.04701179 | 1           |
| YEL013W | 1          | 0.94962021 | 0.92461192 | 0.83877416 | 1           |
| YEL021W | 0.15661473 | 0.01059603 | 0.00657877 | 0.00811299 | 0.194268976 |
| YEL024W | 1          | 0.97605594 | 0.74285272 | 1          | 0.721672524 |
| YEL037C | 0.17186203 | 0.03345219 | 0.05395541 | 0.08536942 | 0.078405232 |
| YEL038W | 0          | 0.0439335  | 0          | 0          | 0.050331694 |
| YEL047C | 0.01892637 | 0.05969651 | 0.00323468 | 0.02599291 | 0.011318368 |
| YEL051W | 1          | 0.75927878 | 0.84993579 | 0.48706534 | 0.655078033 |
| YEL055C | 0.96055455 | 0.90890064 | 0.98012555 | 0.94764832 | 0.909015865 |
| YEL060C | 0.19302402 | 0.26772359 | 0.16924251 | 0.26730339 | 0.776333298 |
| YER003C | 0.12448593 | 0.03451813 | 0.04044054 | 0.02529748 | 0.022555973 |
| YER009W | 0.23199189 | 0.12570648 | 0.0432565  | 0.06617076 | 0.077361893 |
| YER012W | 0.16435658 | 0.07938664 | 0.19254246 | 0.16200735 | 0.199204405 |
| YER021W | 0.87463106 | 0.56041642 | 0.65987827 | 0.69877264 | 0.773525113 |
| YER023W | 0.73305784 | 0.49529783 | 0.35787366 | 0.07417312 | 0.168101912 |
| YER024W | 0.64719633 | 0.50448272 | 0.51927795 | 0.16956756 | 0.5         |
| YER025W | 0.68167323 | 0.71920465 | 0.68817427 | 0.66281674 | 0.533728393 |

|           |            |            |            |            |             |
|-----------|------------|------------|------------|------------|-------------|
| YER036C   | 0.82012825 | 0.71398298 | 0.72592393 | 0.81423526 | 0.697474973 |
| YER042W   | 0.03835004 | 0.10347811 | 0.01044201 | 0.05518645 | 0.080800854 |
| YER043C   | 0.49452442 | 0.404916   | 0.25123288 | 0.29956974 | 0.373561916 |
| YER048W-A | 0.80767583 | 0.83163009 | 0.85875622 | 0.76412193 | 0.734475539 |
| YER052C   | 0.77938938 | 0.31414603 | 0.23113188 | 0.10617977 | 0.182817986 |
| YER055C   | 0.52462209 | 0.17483514 | 0.12348159 | 0.08522    | 0.15149546  |
| YER057C   | 0.22595196 | 0.15909574 | 0.04056443 | 0.06513321 | 0.263239745 |
| YER069W   | 0.82366785 | 0.52347339 | 0.07107368 | 0.28284849 | 0.101656556 |
| YER080W   | 0.90049555 | 0.60119511 | 0.53445337 | 0.56834664 | 0.888944368 |
| YER081W   | 0.22200215 | 0.19763821 | 0.03397016 | 0.06065449 | 0.115626903 |
| YER086W   | 0.86436151 | 0.77906403 | 0.78513756 | 0.80481005 | 0.922232796 |
| YER090W   | 0.22954098 | 0.27397867 | 0.02271812 | 0.09107487 | 0.223190847 |
| YER091C   | 0.04786044 | 0.08420738 | 0.03718064 | 0.13168993 | 0.078402021 |
| YER094C   | 0.23688075 | 0          | 0.12394486 | 0.06399565 | 0.090919123 |
| YER110C   | 0.80272808 | 0.47177249 | 0.42444735 | 0.32957446 | 0.656919099 |
| YER112W   | 1          | 0.78273337 | 0.77782142 | 0.50748061 | 0.786492347 |
| YER114C   | 0.72959457 | 0.97861893 | 0.84929916 | 1          | 1           |
| YER126C   | 1          | 1          | 0.98990518 | 0.9718557  | 0.903558794 |
| YER133W   | 0.45996925 | 0.41651618 | 0.51096532 | 0.52254337 | 0.769981508 |
| YER136W   | 0.05554016 | 0.08194154 | 0.05183589 | 0.17467829 | 0.075156686 |
| YER143W   | 0.19379792 | 0.12739132 | 0.02812111 | 0.26139892 | 0.16890366  |
| YER151C   | 0.83941224 | 0.93992629 | 0.96042772 | 0.89992418 | 0.863527835 |
| YER155C   | 0.97928441 | 0.75212812 | 0.94954524 | 0.92459016 | 0.592646499 |
| YER165W   | 0.19073412 | 0.11930369 | 0.16563481 | 0.47099074 | 0.525261083 |
| YER166W   | 1          | 0.92123106 | 1          | 1          | 1           |
| YER178W   | 0.86274089 | 0.76516635 | 0.90617988 | 0.83115569 | 0.920704987 |
| YFL002C   | 1          | 1          | 0.93491785 | 0.98146954 | 0.981116003 |

|           |            |            |            |            |             |
|-----------|------------|------------|------------|------------|-------------|
| YFL005W   | 0.88315983 | 0.87562521 | 0.8181896  | 0.74203093 | 0.803794004 |
| YFL014W   | 0.57181345 | 0.23673884 | 0.03996729 | 0          | 0.112083089 |
| YFL018C   | 0.36676863 | 0.32094546 | 0.36831713 | 0.49410907 | 0.714319502 |
| YFL022C   | 0.28680614 | 0.31432292 | 0.11508307 | 0.20653818 | 0.176278389 |
| YFL037W   | 0.93460992 | 0.83898999 | 0.88527979 | 0.85348622 | 0.872252725 |
| YFL038C   | 1          | 0.78611448 | 0.84691687 | 0.72175938 | 0.817417112 |
| YFL039C   | 0.51691162 | 0.38321529 | 0.28150934 | 0.29414885 | 0.442883725 |
| YFL041W   | 1          | 0.8953868  | 0.92567094 | 0.9082047  | 1           |
| YFL045C   | 0.1810495  | 0.16409607 | 0.09487459 | 0.13757816 | 0.092530496 |
| YFL048C   | 1          | 0.91471814 | 1          | 1          | 1           |
| YFR001W   | 1          | 0.60979459 | 0.91817757 | 0.71332597 | 0.566927551 |
| YFR004W   | 0.61322648 | 0.37344904 | 0.58335443 | 0.70143484 | 0.671638775 |
| YFR006W   | 0.00586243 | 0.04719329 | 0.04315828 | 0.01639195 | 0.149417653 |
| YFR009W   | 0.66421664 | 0.76542015 | 0.58069993 | 0.89585432 | 0.819259314 |
| YFR010W   | 0.18869648 | 0.33497673 | 0.20555712 | 0.13842678 | 0.39054436  |
| YFR015C   | 0.81159722 | 0.73414134 | 0.37603019 | 0.268485   | 1           |
| YFR024C-A | 0.86047575 | 0.5584656  | 0.97362147 | 0.89522724 | 0.845231751 |
| YFR037C   | 0.90824802 | 0.90966904 | 0.93977252 | 0.84575657 | 0.990003748 |
| YFR044C   | 0.21096331 | 0.14974689 | 0.11493834 | 0.03083972 | 0.099533391 |
| YFR052W   | 0.73657326 | 0.56027784 | 0.60287221 | 0.546367   | 0.641459397 |
| YFR053C   | 0.07768066 | 0.11381283 | 0.04415398 | 0.05764761 | 0.003523252 |
| YGL008C   | 0.9969616  | 0.85750428 | 0.98361776 | 0.96401016 | 0.96722786  |
| YGL009C   | 0.42413798 | 0.1315075  | 0.02894696 | 0.0129459  | 0           |
| YGL011C   | 0.16509177 | 0.17579166 | 0.05767127 | 0.10315688 | 0.053366724 |
| YGL014W   | 0.90019927 | 0.93679631 | 1          | 0.75341024 | 0.856987761 |
| YGL019W   | 0.89080304 | 0.76297795 | 0.96555727 | 0.67962129 | 0.788857354 |
| YGL026C   | 0.18529452 | 0.20929777 | 0.11198312 | 0.09804623 | 0.158525633 |

|         |            |            |            |            |             |
|---------|------------|------------|------------|------------|-------------|
| YGL030W | 0.68820776 | 0.78759767 | 0.75129883 | 0.63745541 | 0.621900935 |
| YGL031C | 0.94617094 | 0.86425567 | 0.89796724 | 0.80303112 | 0.750706097 |
| YGL037C | 0.11146511 | 0.08920809 | 0.19873911 | 0.29835698 | 0.431912242 |
| YGL040C | 0.05243541 | 0.12483467 | 0.03245943 | 0.04801791 | 0.030077529 |
| YGL048C | 0.86126618 | 0.8236376  | 0.8701392  | 0.80248958 | 0.778492061 |
| YGL054C | 1          | 1          | 1          | 0.93377533 | 0.939457331 |
| YGL056C | 0.21727595 | 0.1840695  | 0.12416107 | 0.12733071 | 0           |
| YGL064C | 0.97595245 | 0.9458373  | 1          | 0.94962217 | 1           |
| YGL068W | 0.87945137 | 0.80268262 | 0.92139181 | 0.80470147 | 0.742939871 |
| YGL076C | 0.90149826 | 0.91589148 | 0.83534335 | 0.70911066 | 0.642287112 |
| YGL097W | 0.67678022 | 0.78976274 | 0.77428182 | 0.28465661 | 0.435653884 |
| YGL099W | 1          | 0.84003068 | 0.91236794 | 0.92952026 | 0.900603171 |
| YGL103W | 0.8051291  | 0.89908629 | 0.84151667 | 0.61773995 | 0.648216989 |
| YGL105W | 0.15162451 | 0.17567692 | 0.11956038 | 0.16188757 | 0.120381907 |
| YGL111W | 1          | 1          | 0.94883489 | 0.95646213 | 0.830758718 |
| YGL112C | 1          | 0.93114766 | 0.97044724 | 0.94086828 | 0.990027777 |
| YGL120C | 0.97513971 | 0.90962172 | 0.89442898 | 0.83981956 | 0.780987172 |
| YGL123W | 0.8994491  | 0.93513761 | 0.91113209 | 0.74138168 | 0.71548985  |
| YGL129C | 1          | 0.97297716 | 0.92000944 | 0.87110076 | 0.754767997 |
| YGL137W | 0.81341567 | 0.52872753 | 0.69478571 | 0.53710238 | 0.808163068 |
| YGL147C | 0.89654411 | 0.91338001 | 0.86672689 | 0.67771636 | 0.662701637 |
| YGL148W | 0.0774867  | 0.08673119 | 0.01739877 | 0.11369881 | 0.147035598 |
| YGL150C | 0.98017324 | 0.97954601 | 0.87929852 | 0.95922473 | 0.827741288 |
| YGL151W | 0.97941337 | 0.96623876 | 0.97403002 | 0.98265041 | 1           |
| YGL156W | 0.37187911 | 0.51558995 | 0.52164972 | 0.43063555 | 0.287654498 |
| YGL167C | 0.97943792 | 0.98425314 | 1          | 0.95772623 | 1           |
| YGL173C | 0.75985172 | 0.84248437 | 0.72793312 | 0.55712321 | 0.699732657 |

|         |            |            |            |            |             |
|---------|------------|------------|------------|------------|-------------|
| YGL195W | 0.98415049 | 0.85062997 | 0.85754949 | 0.83734268 | 0.907742762 |
| YGL200C | 1          | 0.91559627 | 0.98460528 | 0.93594125 | 0.987424506 |
| YGL202W | 0.08120356 | 0.11664231 | 0.01798736 | 0.10311529 | 0.094980377 |
| YGL207W | 0.14801139 | 0.24414952 | 0.14383261 | 0.16124973 | 0.149888434 |
| YGL210W | 0.87733717 | 0.93250573 | 0.87813736 | 0.92224731 | 0.863462313 |
| YGL221C | 0.18234393 | 0.16173214 | 0.02948283 | 0          | 0.006405233 |
| YGL234W | 0.46964401 | 0.26996021 | 0.22734642 | 0.17964419 | 0.330959256 |
| YGL245W | 0.13540148 | 0.23699055 | 0.12845533 | 0.18792736 | 0.13958704  |
| YGL246C | 1          | 0.97044952 | 0.87154172 | 0.66516475 | 0.541899822 |
| YGL252C | 0.8738376  | 0.94534418 | 0.7378685  | 0.64406174 | 0.678184139 |
| YGL253W | 0.14072684 | 0.10108542 | 0.08176612 | 0.06801522 | 0.079814867 |
| YGR020C | 0.34545431 | 0.19570497 | 0.12693812 | 0.10513106 | 0.080692937 |
| YGR043C | 0.24104942 | 0.28807244 | 0.22972308 | 0.19438444 | 0.5         |
| YGR054W | 0.72222492 | 0.4993957  | 0.76621249 | 0.69334522 | 0.648478037 |
| YGR061C | 0.10418961 | 0.07751655 | 0.07581417 | 0.13601918 | 0.110383395 |
| YGR086C | 0.82220256 | 0.59348402 | 0.44155234 | 0.30614554 | 0.333614494 |
| YGR087C | 0.21355605 | 0.19845717 | 0.07745723 | 0.07877453 | 0.270801556 |
| YGR090W | 0.98745014 | 0.96466435 | 0.93708187 | 0.88329875 | 0.833748972 |
| YGR094W | 0.12297119 | 0.0695118  | 0.03375482 | 0.04661051 | 0.087596921 |
| YGR103W | 0.91183138 | 0.81851214 | 0.93971654 | 0.81486575 | 0.756827157 |
| YGR124W | 0.09447651 | 0.08249714 | 0.00335825 | 0.01752936 | 0.036855319 |
| YGR128C | 1          | 0.94209439 | 0.95812205 | 0.9515761  | 0.880977401 |
| YGR130C | 0.84060723 | 0.74411439 | 0.40366047 | 0.22876128 | 0.904836667 |
| YGR132C | 1          | 1          | 0.96019376 | 1          | 1           |
| YGR135W | 0.38064259 | 0.14965397 | 0.08080971 | 0.14512951 | 0           |
| YGR148C | 0.97142606 | 0.93027335 | 0.86820325 | 0.94828672 | 0.786939693 |
| YGR155W | 0.18128588 | 0.22915906 | 0.11044283 | 0.16876973 | 0.219102797 |

|         |            |            |            |            |             |
|---------|------------|------------|------------|------------|-------------|
| YGR162W | 0.76425091 | 0.83454224 | 0.736871   | 0.66187376 | 0.689738024 |
| YGR180C | 0.45202507 | 0.17178226 | 0.1169714  | 0.09022499 | 0.14540497  |
| YGR185C | 0.73572337 | 0.59848027 | 0.66110692 | 0.62240259 | 0.555947415 |
| YGR192C | 0.42054075 | 0.33604383 | 0.30317701 | 0.38515884 | 0.426413245 |
| YGR193C | 1          | 0.79242407 | 0.99347482 | 0.98424938 | 1           |
| YGR198W | 0.95767683 | 1          | 1          | 1          | 0.5         |
| YGR200C | 0          | 0.09150655 | 0.50205374 | 0.55400278 | 0.534952057 |
| YGR204W | 0.84904252 | 0.62327376 | 0.70368095 | 0.76855777 | 0.75075317  |
| YGR205W | 0.43220316 | 0.10007369 | 0          | 0.01753988 | 0.323104792 |
| YGR209C | 0.21172224 | 0.14419908 | 0.06469079 | 0.12047481 | 0.113851143 |
| YGR210C | 0.96717185 | 0.96704052 | 0.87003474 | 0.70775589 | 0.600036442 |
| YGR211W | 0.13176411 | 0.14911261 | 0.07773516 | 0.12821117 | 0.168886904 |
| YGR218W | 0.9266752  | 0.78531827 | 0.83199634 | 0.58123448 | 0.902530721 |
| YGR240C | 0.38173909 | 0.4110111  | 0.39886621 | 0.50454143 | 0.445249063 |
| YGR253C | 0.29056533 | 0.08693774 | 0.11978525 | 0.15990758 | 0.098155687 |
| YGR254W | 0.10071642 | 0.13237046 | 0.07527378 | 0.11153571 | 0.130937156 |
| YGR256W | 0.293991   | 0.25541648 | 0.22575447 | 0.23605569 | 0.563255165 |
| YGR264C | 0.19961221 | 0.39977877 | 0.15681924 | 0.24354788 | 0.16415184  |
| YGR267C | 0.83170443 | 0.76066801 | 0.74217693 | 0.59224468 | 0.708215017 |
| YGR282C | 0.30250303 | 0.37025114 | 0.2838035  | 0.36600945 | 0.592184141 |
| YGR285C | 0.75189542 | 0.54588777 | 0.68426975 | 0.74157086 | 0.682605554 |
| YHL011C | 0.79446183 | 0.67758972 | 0.74909923 | 0.7746287  | 0.724379212 |
| YHL015W | 0.8428008  | 0.80663729 | 0.78641376 | 0.68591115 | 0.683525412 |
| YHL021C | 0.05986221 | 0.09048613 | 0.04640408 | 0          | 0           |
| YHL033C | 0.88314105 | 0.90736027 | 0.87144869 | 0.74409495 | 0.671772883 |
| YHL034C | 0.11110246 | 0.18476178 | 0.21687222 | 0.39105355 | 0.301938701 |
| YHR007C | 0.8269098  | 1          | 1          | 1          | 0.997581163 |

|         |            |            |            |            |             |
|---------|------------|------------|------------|------------|-------------|
| YHR008C | 0.22792277 | 0.28263061 | 0.24822945 | 0.17540506 | 0.203310501 |
| YHR012W | 1          | 0.62369263 | 0.81393345 | 0.52955055 | 0.810212696 |
| YHR013C | 0.96131195 | 0.94071565 | 0.88298956 | 0.74539537 | 0.596645444 |
| YHR018C | 0.08292483 | 0.09002903 | 0          | 0.01345973 | 0.023736179 |
| YHR019C | 0.22741997 | 0.20219459 | 0.22473202 | 0.29695476 | 0.294838334 |
| YHR020W | 0.42221887 | 0.29644959 | 0.2740553  | 0.31757461 | 0.24189162  |
| YHR025W | 0.95265256 | 0.24328685 | 0.36837332 | 0.34562662 | 0.485195765 |
| YHR027C | 0.92421703 | 0.72958253 | 0.84124447 | 0.71084161 | 0.80239664  |
| YHR037W | 0.19165026 | 0.15384883 | 0.04496195 | 0.03023791 | 0.124990184 |
| YHR051W | 0.71582901 | 0.70151533 | 0.75435493 | 1          | 0.511079381 |
| YHR052W | 0.95495249 | 0.84919032 | 0.84640946 | 0.85713226 | 0.777231768 |
| YHR062C | 0.89826404 | 1          | 0.97084242 | 0.64117284 | 0.925655922 |
| YHR064C | 0.71025466 | 0.60948424 | 0.67907043 | 0.64199575 | 0.589543972 |
| YHR068W | 0.03089119 | 0.02389331 | 0.01931542 | 0.02052648 | 0.039313264 |
| YHR087W | 0          | 0.03783822 | 0.02361586 | 0          | 0.12031914  |
| YHR088W | 1          | 0.99331029 | 0.99756729 | 0.97528423 | 0.944772365 |
| YHR089C | 0.91948466 | 0.91241182 | 0.81600051 | 0.7312682  | 0.655627583 |
| YHR097C | 0.88019504 | 0.85335489 | 0.80710353 | 0.84372354 | 0.648071591 |
| YHR099W | 0.97509033 | 0.92532342 | 0.85463431 | 0.94815556 | 0.97550402  |
| YHR104W | 0.02172104 | 0.03102225 | 0.00067487 | 0.03593642 | 0.055317122 |
| YHR107C | 0.65089056 | 0.56554882 | 0.79498375 | 0.74121737 | 0.778097748 |
| YHR113W | 0.24450488 | 0.25505777 | 0.13597432 | 0.03219613 | 0.244142802 |
| YHR121W | 0.33009072 | 0.48839638 | 0.85890811 | 0.69985327 | 0.732931866 |
| YHR127W | 1          | 0.95612255 | 0.93909463 | 0.90009579 | 0.923915774 |
| YHR128W | 0.05094882 | 0.15420244 | 0.01482609 | 0.01129098 | 0.030928674 |
| YHR139C | 0.1123721  | 0.1199241  | 0.06050086 | 0.04147645 | 0           |
| YHR163W | 0          | 0          | 0.10758097 | 0.08237425 | 0.049216666 |



|         |            |            |            |            |             |
|---------|------------|------------|------------|------------|-------------|
| YHR169W | 1          | 1          | 1          | 0.92710458 | 0.956995332 |
| YHR170W | 0.72646219 | 0.67064282 | 0.79456292 | 0.71716445 | 0.715581653 |
| YHR174W | 0.11869591 | 0.15344844 | 0.08203108 | 0.13379712 | 0.148163901 |
| YHR183W | 0.22822097 | 0.25138376 | 0.22040536 | 0.2171598  | 0.292288028 |
| YHR193C | 0.41127326 | 0.32517803 | 0.48445232 | 0.60985423 | 0.525633308 |
| YHR197W | 1          | 0.76531247 | 0.95702639 | 0.91264353 | 0.818841614 |
| YHR200W | 0.44083563 | 0.41153012 | 0.30601208 | 0.47122252 | 0.373106844 |
| YHR208W | 0.03224051 | 0.28299667 | 0.02802162 | 0.07316597 | 0.037643898 |
| YIL005W | 0.93399061 | 1          | 1          | 1          | 0.988175257 |
| YIL010W | 0.71583446 | 0.7230009  | 0.58710539 | 0.83210134 | 0.559339012 |
| YIL022W | 1          | 0.7981764  | 0.95741998 | 0.86383984 | 0.825477862 |
| YIL033C | 0.21334571 | 0.16829706 | 0.10662644 | 0.12910012 | 0.103961485 |
| YIL035C | 0.95380071 | 0.88347553 | 0.99090795 | 0.86384109 | 0.947838245 |
| YIL041W | 0.79423742 | 0.56324541 | 0.52273953 | 0.61003108 | 0.661912715 |
| YIL051C | 0.08932405 | 0.0540268  | 0.01311573 | 0.07702875 | 0.100928297 |
| YIL053W | 0.69328458 | 0.30452176 | 0.12480234 | 0.19763475 | 0.244167115 |
| YIL055C | 0.51405301 | 0.6104507  | 0.69187555 | 0.74455737 | 0.39931842  |
| YIL062C | 0.8017351  | 0          | 0.29768225 | 0.27872348 | 0.283673852 |
| YIL070C | 0.28216347 | 0.15027317 | 0.11580672 | 0.02761762 | 0.21890316  |
| YIL074C | 1          | 0.09343777 | 0.07585381 | 0.04996182 | 0           |
| YIL075C | 0.87245141 | 0.82503629 | 0.87260762 | 0.80968198 | 0.855035431 |
| YIL076W | 0.94960372 | 0.82548892 | 0.76442773 | 0.50021817 | 0.816611679 |
| YIL078W | 0.55901431 | 0.79228855 | 0.4558637  | 0.4354943  | 0.494247163 |
| YIL083C | 0.13978704 | 0.06697545 | 0.00955088 | 0.05356102 | 0           |
| YIL091C | 0.81721159 | 0.50131614 | 0.83718287 | 0.76946497 | 0.717478737 |
| YIL094C | 0.32266651 | 0.27347481 | 0.15079935 | 0.06550666 | 0.365633843 |
| YIL105C | 1          | 0.92220166 | 1          | 1          | 0.82338399  |

|         |            |            |            |            |             |
|---------|------------|------------|------------|------------|-------------|
| YIL109C | 0.26975832 | 0.2446299  | 0.21537892 | 0.50210515 | 0.482910499 |
| YIL116W | 0.24955384 | 0.04236213 | 0.09123284 | 0.06863507 | 0.074491548 |
| YIL124W | 0.90873671 | 0.94649006 | 0.94183128 | 1          | 1           |
| YIL125W | 0.73478129 | 0.71204631 | 0.84756247 | 0.78712466 | 0.746020009 |
| YIL126W | 0.91726843 | 0.79895405 | 0.94027059 | 0.96359002 | 0.943050175 |
| YIL128W | 0.95817715 | 0.94052221 | 0.94404434 | 0.94129691 | 0.943651679 |
| YIL133C | 0.90427693 | 0.95298036 | 0.88854725 | 0.72552639 | 0.65550221  |
| YIL137C | 0.79440453 | 0.58670688 | 0.933772   | 0.72329304 | 0.92323224  |
| YIL142W | 0.89058378 | 0.7861441  | 0.62762167 | 0.74627246 | 0.741879674 |
| YIL162W | 0.12944402 | 0.19231895 | 0.08401692 | 0.01518126 | 0.182749149 |
| YIR037W | 0.03052074 | 0.10794487 | 0.01605721 | 0.01319469 | 0.031713173 |
| YJL002C | 1          | 1          | 1          | 1          | 1           |
| YJL005W | 0.91688465 | 0.86328747 | 0.94322016 | 0.82821343 | 0.512924381 |
| YJL008C | 0.93393756 | 0.77061632 | 0.69086627 | 0.74761996 | 0.778374794 |
| YJL010C | 0.86937064 | 1          | 0.72926309 | 0.76082444 | 0.728370567 |
| YJL014W | 0.83907921 | 0.71183265 | 0.63022456 | 0.67021908 | 0.778113408 |
| YJL026W | 0.58462312 | 0.37043608 | 0.20904099 | 0.18434633 | 0.320704325 |
| YJL033W | 0.87160581 | 0.98995657 | 0.98007794 | 0.79581923 | 0.802380593 |
| YJL034W | 0.63496725 | 0.41023838 | 0.29001705 | 0.58277912 | 0.636650992 |
| YJL050W | 1          | 0.80672705 | 0.91184593 | 0.72953544 | 0.662855797 |
| YJL052W | 0.39881648 | 0.24366445 | 0.21387067 | 0.225732   | 0.169044863 |
| YJL080C | 0.41395639 | 0.4350475  | 0.41698541 | 0.49967434 | 0.549546998 |
| YJL081C | 0.65950827 | 0.60537347 | 0.62213598 | 0.63038852 | 0.761088287 |
| YJL109C | 0.99783407 | 0.93898194 | 0.97536221 | 0.97476683 | 0.974836106 |
| YJL111W | 0.90938566 | 0.84868306 | 0.59468771 | 0.64606674 | 0.680015879 |
| YJL115W | 0          | 0.06184205 | 0          | 0          | 0.033506969 |
| YJL123C | 0.68672432 | 0.2413705  | 0.25504755 | 0.2386467  | 0.225088171 |

|         |            |            |            |            |             |
|---------|------------|------------|------------|------------|-------------|
| YJL124C | 0.75451164 | 0.24897952 | 0.49507086 | 0.4087904  | 1           |
| YJL130C | 0.8492202  | 0.82041993 | 0.86518766 | 0.91770979 | 0.630322736 |
| YJL136C | 0.72755986 | 0.41708425 | 0.2819009  | 0.30578975 | 0.308734757 |
| YJL153C | 0.12616774 | 0.17643098 | 0.04408329 | 0.03719149 | 0.03908244  |
| YJL164C | 0.18609726 | 0.11369142 | 0.06550256 | 0          | 0.152950896 |
| YJL167W | 0.27967415 | 0.0806979  | 0.11303767 | 0.06825831 | 0.085935795 |
| YJL172W | 0.11162434 | 0.39544498 | 0.50827618 | 0.53449646 | 0.715644376 |
| YJL177W | 0.89559826 | 0.87630828 | 0.83733047 | 0.74188403 | 0.720200654 |
| YJL178C | 1          | 0.74339782 | 1          | 1          | 0.660640702 |
| YJL200C | 0.17990531 | 0.04362079 | 0.01309088 | 0.05189622 | 0.091451078 |
| YJR007W | 0.53598116 | 0.47957207 | 0.56782255 | 0.49489378 | 0.472482531 |
| YJR009C | 0.67275375 | 0.49640833 | 0.42600305 | 0.30045679 | 0.479442845 |
| YJR016C | 0.0731829  | 0.12647116 | 0.06883838 | 0.22706652 | 0.234692516 |
| YJR041C | 1          | 1          | 0.99282883 | 0.9552517  | 1           |
| YJR045C | 0.42081308 | 0.32141366 | 0.18109186 | 0.18045355 | 0.253708832 |
| YJR048W | 0.46706727 | 0.28974343 | 0.44909687 | 0.50906123 | 0.457581094 |
| YJR064W | 0.74866264 | 0.40217899 | 0.42694027 | 0.70375696 | 0.638126313 |
| YJR065C | 0.89749066 | 0.73888141 | 0.6555098  | 0.58235562 | 0.749212392 |
| YJR068W | 1          | 0.99528216 | 0.96268466 | 0.91726379 | 0.86925994  |
| YJR070C | 0.42364323 | 0.09127781 | 0.06044041 | 0.14938504 | 0.167947942 |
| YJR076C | 0.41780241 | 0.17989301 | 0.70438684 | 0.68956539 | 0.54512357  |
| YJR077C | 1          | 0.97629663 | 0.97596645 | 0.93633289 | 0.992516234 |
| YJR103W | 0.20796392 | 0.29553888 | 0.07826642 | 0.16725104 | 0.5         |
| YJR104C | 0.07287692 | 0.1096769  | 0.03493985 | 0.06180889 | 0.009768533 |
| YJR105W | 0.04454573 | 0.1625398  | 0.02348328 | 0.01049487 | 0.023329037 |
| YJR109C | 0.17875862 | 0.09441273 | 0.05309901 | 0.03351255 | 0.047513706 |
| YJR121W | 0.69939103 | 0.64840809 | 0.56056953 | 0.45875406 | 0.617131885 |

|         |            |            |            |            |             |
|---------|------------|------------|------------|------------|-------------|
| YJR123W | 0.83387073 | 0.83298441 | 0.70016145 | 0.6259957  | 0.568901317 |
| YJR132W | 0.91306297 | 0.86975971 | 0.94538143 | 0.95670312 | 0.847789515 |
| YJR139C | 0.20052567 | 0.26804889 | 0.0831413  | 0.04124506 | 0.149713048 |
| YJR148W | 0.04751172 | 0.1552058  | 0.00315892 | 0.06491059 | 0.038649146 |
| YKL007W | 0.5272421  | 0.12730223 | 0.05650461 | 0.08052281 | 0.273344355 |
| YKL009W | 0.61977093 | 0.73294261 | 0.76439656 | 0.80014242 | 0.709061809 |
| YKL013C | 0.60178459 | 0.34015338 | 0.32647282 | 0.13512445 | 0.462629778 |
| YKL018W | 0.88198216 | 0.89546061 | 0.90729016 | 0.83540848 | 1           |
| YKL019W | 1          | 0.07864768 | 0          | 0          | 0.350881445 |
| YKL021C | 0.55554928 | 0.8376037  | 0.856479   | 0.75318893 | 0.81899881  |
| YKL035W | 0.27011715 | 0.50057441 | 0.52616519 | 0.5729489  | 0.503884905 |
| YKL039W | 0.7516044  | 1          | 1          | 1          | 0.936435077 |
| YKL050C | 0.91799421 | 0.80016396 | 0.65053014 | 0.56795659 | 0           |
| YKL056C | 0.12481802 | 0.09961924 | 0.05538706 | 0.16157034 | 0.092142166 |
| YKL060C | 0.28449571 | 0.14222823 | 0.07716644 | 0.133417   | 0.118180314 |
| YKL067W | 0.10227475 | 0.14032399 | 0.08332384 | 0.09781658 | 0.096246055 |
| YKL077W | 1          | 0.8125498  | 0.85160712 | 1          | 1           |
| YKL080W | 0.4662419  | 0.19746659 | 0.1919871  | 0.16759421 | 0.251365188 |
| YKL081W | 0.34413786 | 0.27630485 | 0.36884997 | 0.43304424 | 0.328045077 |
| YKL085W | 0.09055397 | 0.10843905 | 0.093473   | 0.0747892  | 0.109908877 |
| YKL096W | 0.26896941 | 0.17734495 | 0.15113737 | 0.30092954 | 0.569279597 |
| YKL103C | 0.26655735 | 0.29402896 | 0.1848452  | 0.06825463 | 0.053164315 |
| YKL104C | 0.90874973 | 0.84739052 | 0.70483235 | 0.70613153 | 0.814602082 |
| YKL106W | 1          | 0.91378078 | 0.96456535 | 0.72080515 | 0.944992827 |
| YKL117W | 0.0606083  | 0          | 0          | 0.02289134 | 0.038409204 |
| YKL135C | 1          | 0.94296711 | 0.91681863 | 0.68071492 | 0.72284487  |
| YKL142W | 0.09919085 | 0.11086786 | 0.02960411 | 0.02855109 | 0.009943672 |

|         |            |            |            |            |             |
|---------|------------|------------|------------|------------|-------------|
| YKL145W | 0.88337489 | 0.8329455  | 0.8714849  | 0.74073993 | 0.90116787  |
| YKL148C | 0.54902678 | 0.54860296 | 0.53559007 | 0.45925541 | 0.846949394 |
| YKL150W | 0.28382832 | 0.3564269  | 0.44540581 | 0.26453773 | 0.14296343  |
| YKL151C | 0.38781981 | 0.4309567  | 0.35708307 | 0.266126   | 0           |
| YKL152C | 0.23335206 | 0.39404911 | 0.18255211 | 0.2147204  | 0.26728246  |
| YKL157W | 0.34282639 | 0.17661277 | 0.07346184 | 0.06390155 | 0.340911802 |
| YKL180W | 0.90778895 | 0.88910944 | 0.83271489 | 0.68856573 | 0.594289311 |
| YKL182W | 0.70028698 | 0.50981403 | 0.7458278  | 0.77191426 | 0.622515858 |
| YKL193C | 0.16254054 | 0.0753782  | 0.12369932 | 0          | 0           |
| YKL203C | 1          | 1          | 1          | 1          | 0.985153682 |
| YKL210W | 0.05639199 | 0.05881386 | 0.01475249 | 0.03443695 | 0.037419325 |
| YKL212W | 1          | 0.86276837 | 0.88091296 | 1          | 1           |
| YKL213C | 0.06598164 | 0          | 0.0187392  | 0.23843289 | 0.5         |
| YKR001C | 0.8553634  | 0.71893994 | 0.93358898 | 0.87973863 | 0.914065436 |
| YKR008W | 0.80110076 | 0.73926781 | 0.90758611 | 0.94892381 | 0.94067277  |
| YKR014C | 0.86037235 | 0.7847944  | 0.58838429 | 0.92482839 | 0.647251418 |
| YKR026C | 1          | 1          | 0.76899308 | 0.97382019 | 0.96945077  |
| YKR043C | 0.11253367 | 0.05690702 | 0.06636846 | 0          | 0.024595746 |
| YKR046C | 0.9455362  | 0.79038694 | 0.83348539 | 0.79813255 | 1           |
| YKR048C | 0.46855319 | 0.12211673 | 0.06496136 | 0.12923435 | 0.038015186 |
| YKR066C | 0          | 0.0883803  | 0.01325611 | 0.07055667 | 0           |
| YKR074W | 0.02815182 | 0          | 0          | 0          | 0           |
| YKR080W | 0.01022047 | 0.12674089 | 0.05136734 | 0.02903772 | 0.015970998 |
| YKR081C | 0.61890631 | 0.77174411 | 0.74969974 | 0.62493603 | 0.888230311 |
| YLL001W | 0.89478644 | 0.65716525 | 0.4941108  | 0.32797511 | 0.587943361 |
| YLL018C | 0.31386988 | 0.33981951 | 0.27933244 | 0.31958016 | 0.381769105 |
| YLL024C | 0.41420913 | 0.2737039  | 0.2351733  | 0.26931095 | 0.323426137 |

|         |            |            |            |            |             |
|---------|------------|------------|------------|------------|-------------|
| YLL026W | 0.22059195 | 0.17495096 | 0.09173962 | 0.19031783 | 0.106233014 |
| YLL029W | 0.66148499 | 0.86355334 | 0.83372534 | 0.86282935 | 1           |
| YLL036C | 0.93782793 | 0.92663263 | 0.95774543 | 1          | 0.882190941 |
| YLL045C | 0.8479482  | 0.91020195 | 0.83970818 | 0.61479932 | 0.61663282  |
| YLL050C | 0.07079027 | 0.04061673 | 0.01835308 | 0.06435828 | 0.053189022 |
| YLR002C | 0.92319347 | 1          | 1          | 0.94898061 | 0.969983863 |
| YLR009W | 1          | 0.91405231 | 0.9867352  | 0.97927647 | 0.537236168 |
| YLR017W | 1          | 0          | 0.34663291 | 0.6478732  | 0.692333452 |
| YLR027C | 0.19766045 | 0.14568888 | 0.01081276 | 0.03037726 | 0.088342794 |
| YLR028C | 0.08946934 | 0.24827193 | 0.0115152  | 0.03797187 | 0.081002497 |
| YLR029C | 0.99945666 | 0.99802315 | 0.9701672  | 0.8162103  | 0.77716269  |
| YLR033W | 1          | 1          | 1          | 0.88510051 | 1           |
| YLR043C | 0.12697438 | 0.09766847 | 0.0335695  | 0.05519426 | 0.184213273 |
| YLR044C | 0.16206081 | 0.16561855 | 0.08648671 | 0.12999091 | 0.129588312 |
| YLR048W | 0.71826782 | 0.57629662 | 0.48023077 | 0.39572239 | 0.479875052 |
| YLR058C | 0.33184846 | 0.23943207 | 0.33998769 | 0.50595618 | 0.467387465 |
| YLR060W | 0.0960185  | 0.17590252 | 0.11199415 | 0.16744666 | 0.148231447 |
| YLR061W | 0.60668142 | 0.70535591 | 0.66885239 | 0.57594423 | 0.555427574 |
| YLR069C | 0.09989211 | 0.39410494 | 0          | 0.01845958 | 0           |
| YLR075W | 0.89702485 | 0.92625747 | 0.88497842 | 0.7476433  | 0.707733232 |
| YLR109W | 0.04395164 | 0.10446999 | 0.02826966 | 0.04714257 | 0.051888813 |
| YLR150W | 0.72493736 | 0.76402488 | 0.62965642 | 0.71188735 | 0.553467372 |
| YLR153C | 0.21820156 | 0.35320848 | 0.34959759 | 0.55725377 | 0.453581351 |
| YLR163C | 0.74189284 | 0.48966696 | 0.12443622 | 0.03960768 | 0.274042591 |
| YLR167W | 0.51950414 | 0.63086102 | 0.46034544 | 0.46433327 | 0.487682402 |
| YLR172C | 0.01382301 | 0.09211642 | 0.01789858 | 0          | 0.041024494 |
| YLR174W | 0.36494043 | 0.22475892 | 0.14115704 | 0.14786805 | 0.366700683 |

|           |            |            |            |            |             |
|-----------|------------|------------|------------|------------|-------------|
| YLR175W   | 0.81008541 | 0.89165766 | 0.92924498 | 0.72549393 | 0.699647467 |
| YLR178C   | 0.02833452 | 0.07707589 | 0.03054313 | 0.05283234 | 0           |
| YLR180W   | 0.67872998 | 0.53369507 | 0.34007174 | 0.34087416 | 0.28005891  |
| YLR195C   | 0.07597859 | 0.10615867 | 0.01978796 | 0.17303006 | 0.112639431 |
| YLR196W   | 0.83303017 | 0.83901407 | 0.62434672 | 0.69161531 | 0.397628737 |
| YLR197W   | 0.95189323 | 0.90697327 | 0.90450896 | 0.84675417 | 0.85059726  |
| YLR208W   | 0.52416742 | 0.37434111 | 0.3068786  | 0.61552349 | 0.695920267 |
| YLR209C   | 0.17269253 | 0.01461757 | 0.02077222 | 0          | 0.32606075  |
| YLR216C   | 0.16402641 | 0.15871918 | 0.01769997 | 0.27514559 | 0.399368658 |
| YLR222C   | 1          | 0.70994162 | 0.9514983  | 0.97920756 | 0.973559636 |
| YLR231C   | 0.06275157 | 0.11443303 | 0.00871588 | 0          | 0.638370446 |
| YLR244C   | 0.94496939 | 0.82430525 | 0.93850244 | 0.79986254 | 0.827923017 |
| YLR249W   | 0.64889387 | 0.55135606 | 0.42507619 | 0.35818618 | 0.36360626  |
| YLR250W   | 1          | 0.95487308 | 0.93431982 | 0.96409703 | 1           |
| YLR259C   | 0.4194227  | 0.43950729 | 0.22494681 | 0.27954154 | 0.241155111 |
| YLR262C   | 1          | 0.90593751 | 1          | 1          | 1           |
| YLR270W   | 0.03900675 | 0.09628313 | 0.03004756 | 0.03480971 | 0.013597464 |
| YLR290C   | 1          | 0.92291419 | 1          | 1          | 1           |
| YLR291C   | 1          | 1          | 1          | 0.98951293 | 0.944411393 |
| YLR303W   | 0.21667322 | 0.06305379 | 0.03208735 | 0.0777209  | 0.122757078 |
| YLR304C   | 0.1030053  | 0.1057278  | 0.02520591 | 0.0696824  | 0.094275134 |
| YLR312W-A | 0.87869928 | 0.89998416 | 0.88493461 | 0.70219856 | 0.890225634 |
| YLR321C   | 1          | 1          | 1          | 0.81505517 | 0.919353003 |
| YLR325C   | 0.95979233 | 0.8468581  | 0.9093774  | 0.74500491 | 0.659350618 |
| YLR330W   | 0.78596829 | 0.84373902 | 0.86391535 | 0.87380131 | 0.836647492 |
| YLR340W   | 0.71954259 | 0.74645057 | 0.67418692 | 0.73383943 | 0.668001494 |
| YLR342W   | 1          | 0.78774585 | 0.98678446 | 0.99739514 | 0.947833004 |

|         |            |            |            |            |             |
|---------|------------|------------|------------|------------|-------------|
| YLR347C | 0.90163321 | 0.73839457 | 0.82043444 | 0.57022327 | 0.852349647 |
| YLR354C | 0.03947297 | 0.08775494 | 0.02169248 | 0.06067554 | 0.076477173 |
| YLR355C | 0.57758512 | 0.41665999 | 0.2711769  | 0.29402948 | 0.493140053 |
| YLR357W | 1          | 0.79369322 | 0.80066969 | 0.90460336 | 1           |
| YLR359W | 0.0892455  | 0.14691052 | 0.03434689 | 0.10549435 | 0.096368847 |
| YLR370C | 0.8478216  | 0.76234663 | 0.25522015 | 0.42740679 | 0.558639214 |
| YLR378C | 0.99058195 | 0.86992182 | 1          | 0.99302804 | 1           |
| YLR384C | 0.92250196 | 0.83629415 | 0.80570766 | 0.86848101 | 0.82399656  |
| YLR388W | 1          | 0.9677599  | 0.84994169 | 0.61196083 | 0.630104826 |
| YLR398C | 0.9653969  | 0.91126713 | 0.88703173 | 0.93642303 | 0.922543461 |
| YLR411W | 0.99690975 | 1          | 1          | 0.96582656 | 0.973939757 |
| YLR420W | 0.0734672  | 0.03862035 | 0.01260339 | 0          | 0           |
| YLR421C | 0.80649057 | 0.96536351 | 0.72950131 | 0.7078211  | 0.369088398 |
| YLR429W | 0          | 0          | 0.02745344 | 0          | 0.090838678 |
| YLR432W | 0.79172499 | 0.71414982 | 0.72236695 | 0.69982904 | 0.616247739 |
| YLR438W | 0.09367896 | 0.11595472 | 0.04174338 | 0.07761527 | 0.145868851 |
| YLR439W | 1          | 0.97248654 | 0.87339552 | 1          | 0.735937489 |
| YLR441C | 0.97836432 | 0.99009015 | 0.89218222 | 0.75254365 | 0.76496341  |
| YLR447C | 0.9853472  | 0.86350064 | 0.92775125 | 0.88422788 | 0.964143478 |
| YLR448W | 0.8228464  | 0.887341   | 0.80969631 | 0.66111821 | 0.614975112 |
| YLR449W | 0.77249647 | 0.86407141 | 0.51957999 | 0.44663409 | 0.359441586 |
| YML001W | 0.78605522 | 0.81145124 | 0.77421062 | 0.85494419 | 0.945018863 |
| YML004C | 0.03914253 | 0.10194132 | 0.01311275 | 0.01102317 | 0.023174804 |
| YML008C | 0.96743789 | 0.87219017 | 0.96316739 | 0.96187058 | 0.909514366 |
| YML010W | 0.39437451 | 0.57281671 | 0.84126731 | 0.65458357 | 0.658466022 |
| YML017W | 0.78588165 | 0.79669633 | 0.96740706 | 0.42533481 | 0.883963494 |
| YML022W | 0.07351222 | 0.07306739 | 0.05654079 | 0.07869998 | 0.072180995 |



|         |            |            |            |            |             |
|---------|------------|------------|------------|------------|-------------|
| YML025C | 1          | 0.96590546 | 0.97662303 | 0.97367988 | 0.899197719 |
| YML028W | 0.11158152 | 0.12321639 | 0.08236869 | 0.10258701 | 0.122450314 |
| YML035C | 0.81483261 | 0.78308446 | 0.75009489 | 0.50034184 | 0.434940262 |
| YML056C | 0.98668446 | 0.87086285 | 0.74707958 | 0.78392602 | 0.777517939 |
| YML057W | 0.64473443 | 0.3558038  | 0.17290559 | 0.13164759 | 0.143632062 |
| YML063W | 0.94083975 | 0.89824268 | 0.87263614 | 0.75776075 | 0.743364278 |
| YML069W | 0.22249738 | 0.03180566 | 0.03827028 | 0.12516122 | 0           |
| YML070W | 0.46125453 | 0.3191509  | 0.02960622 | 0.05932436 | 0.17062136  |
| YML072C | 0.80097058 | 0.82230115 | 0.92685224 | 0.94533493 | 1           |
| YML073C | 0.7792404  | 0.86102271 | 0.84460112 | 0.60824152 | 0.627721141 |
| YML074C | 0.55086401 | 0.63774856 | 0.41049203 | 0.39666986 | 0.379808074 |
| YML078W | 0.0036415  | 0.00523538 | 0.00605557 | 0.01865068 | 0           |
| YML085C | 0.95146156 | 0.83944718 | 0.87148784 | 0.77997961 | 0.838718581 |
| YML086C | 1          | 0.86608625 | 0.92167854 | 0.92784091 | 1           |
| YML092C | 0.1816984  | 0.24880983 | 0.16612779 | 0.16530973 | 0.263517603 |
| YML100W | 0.717585   | 0.29039162 | 0.66658579 | 0.64967859 | 0.7473177   |
| YML106W | 0.00562745 | 0.0372809  | 0.00289529 | 0.03042213 | 0.053311792 |
| YML115C | 1          | 0.93437259 | 1          | 0.92410138 | 1           |
| YML126C | 0.09196889 | 0.06917262 | 0.05974607 | 0.07455075 | 0.112316789 |
| YML127W | 0.96249025 | 0.99745212 | 0.90319037 | 0.89725722 | 1           |
| YMR004W | 0.88686393 | 0.52838863 | 0.83604405 | 0.86584719 | 0.758416827 |
| YMR012W | 0.92784799 | 0.94800973 | 0.94894982 | 0.82279792 | 0.813991048 |
| YMR024W | 0.97992486 | 0.84337872 | 0.81464078 | 0.87583749 | 0.815939373 |
| YMR027W | 0.11759365 | 0.08324562 | 0.02064423 | 0.06456408 | 0.110077781 |
| YMR033W | 0.90502566 | 0.90014396 | 0.89563232 | 0.82728862 | 0.930182651 |
| YMR038C | 0          | 0.02516723 | 0.01252524 | 0          | 0           |
| YMR039C | 0.7276694  | 0.59278689 | 0.75124868 | 0.79257647 | 0.451961486 |

|         |            |            |            |            |             |
|---------|------------|------------|------------|------------|-------------|
| YMR049C | 0.90094173 | 0.81696902 | 0.84432902 | 0.89958108 | 0.852989691 |
| YMR072W | 0.46036513 | 0.82347372 | 0.32117139 | 0.33034766 | 0.018189509 |
| YMR079W | 0.21139337 | 0.14625191 | 0.14428006 | 0.08307037 | 0.226704942 |
| YMR080C | 0.91085842 | 0.69451374 | 0.98591409 | 0.80924443 | 0.624036177 |
| YMR083W | 0.27860089 | 0.30016196 | 0.17116462 | 0.39571816 | 0.595899786 |
| YMR086W | 0.98871846 | 0.79928581 | 0.86889427 | 0.86704462 | 1           |
| YMR092C | 0.00626113 | 0.08167881 | 0          | 0.04877993 | 0           |
| YMR093W | 0.88566579 | 0.92555568 | 0.94479516 | 0.96483474 | 0.891261121 |
| YMR099C | 0.04037439 | 0.0498485  | 0.02487174 | 0.02722678 | 0.129154104 |
| YMR105C | 0.33234127 | 0.07655409 | 0.05769117 | 0.04407962 | 0.391425883 |
| YMR108W | 1          | 0.49801993 | 0.78944647 | 0.86606272 | 0.853423501 |
| YMR116C | 0.11131894 | 0.22237318 | 0.1135977  | 0.22958497 | 0.282177306 |
| YMR120C | 0.13807409 | 0.14910524 | 0.03453741 | 0.0675498  | 0.133206093 |
| YMR121C | 0.91175886 | 0.94957597 | 0.95923111 | 0.80007707 | 0.744325828 |
| YMR125W | 0.42865384 | 0.35179139 | 0.24041584 | 0.17364777 | 0.323165531 |
| YMR128W | 1          | 0.58262585 | 1          | 1          | 0.672079797 |
| YMR131C | 0.96665233 | 0.96982713 | 0.93251079 | 0.76006101 | 0.878606525 |
| YMR142C | 0.90673828 | 0.92041176 | 0.86606874 | 0.70793684 | 0.668373311 |
| YMR146C | 0.84835594 | 0.80955571 | 0.85744091 | 0.79684849 | 0.777965677 |
| YMR169C | 0.64216461 | 0.46437663 | 0.34685618 | 0.29766909 | 0.84705819  |
| YMR170C | 0.54885548 | 0.37104946 | 0.33538967 | 0.31199355 | 0           |
| YMR186W | 0.38048813 | 0.30087419 | 0.19429681 | 0.24381951 | 0.276647677 |
| YMR188C | 0.98860826 | 0.88664342 | 0.87816921 | 0.87482414 | 0.657350171 |
| YMR189W | 0.11050293 | 0.18969221 | 0.49813545 | 0.7808699  | 0.445581963 |
| YMR203W | 1          | 0.96814759 | 0.95875549 | 0.93614158 | 1           |
| YMR205C | 0.40911297 | 0.42164123 | 0.39428734 | 0.51029857 | 0.397677325 |
| YMR212C | 1          | 0.96086066 | 1          | 1          | 0.835206549 |

|         |            |            |            |            |             |
|---------|------------|------------|------------|------------|-------------|
| YMR217W | 0.04467455 | 0.14619351 | 0.0183608  | 0.04167055 | 0.043653387 |
| YMR226C | 0.09835847 | 0.11619004 | 0.04241864 | 0.04612948 | 0.039977918 |
| YMR229C | 0.91440733 | 0.93760932 | 0.57686839 | 0.60997998 | 0.664452384 |
| YMR235C | 0.598135   | 0.1162989  | 0.06914406 | 0.11917837 | 0.270924405 |
| YMR243C | 1          | 1          | 1          | 1          | 0.977047639 |
| YMR247C | 0.84199976 | 1          | 1          | 0.91066364 | 0.936836025 |
| YMR250W | 0.13795537 | 0.24775957 | 0.09602146 | 0.0972461  | 0           |
| YMR251W | 0.22136447 | 0.14212949 | 0.06034809 | 0.03537988 | 0.807460991 |
| YMR260C | 0.0098791  | 0.15192217 | 0.09844981 | 0.36871051 | 0.338511931 |
| YMR290C | 0.92215278 | 0.7991884  | 0.89157191 | 0.92972942 | 0.873774003 |
| YMR300C | 0.10983195 | 0.25259454 | 0.18619543 | 0.30162237 | 0.276753154 |
| YMR303C | 0.63868167 | 0.51019287 | 0.21751935 | 0.22562079 | 0.323974088 |
| YMR307W | 0.63264214 | 0.61396862 | 0.81721713 | 0.91219553 | 0.930546539 |
| YMR308C | 1          | 0.8098825  | 0.64944908 | 0.62104755 | 0.922879824 |
| YMR309C | 0.92317349 | 0.76790886 | 0.85325229 | 0.81852188 | 0.823641296 |
| YMR314W | 0.25050071 | 0.17346341 | 0.15002828 | 0.23329579 | 0.059075238 |
| YMR315W | 0.17275985 | 0.07575042 | 0          | 0.0912577  | 0.290149623 |
| YMR318C | 0.0680599  | 0.15529973 | 0.01992772 | 0.01762646 | 0.012473653 |
| YNL002C | 1          | 0.8454341  | 0.92638679 | 0.89296322 | 0.867993953 |
| YNL005C | 0.98485771 | 0.98716603 | 0.88372122 | 0.96240194 | 0.675600433 |
| YNL007C | 0.7376594  | 0.5538893  | 0.79401717 | 0.71102803 | 0.712011779 |
| YNL010W | 0.32607127 | 0.12285032 | 0          | 0.01615632 | 0.176047032 |
| YNL014W | 0.78781345 | 0.42201642 | 0.43401641 | 0.57016457 | 0.230693856 |
| YNL016W | 0          | 0.18360146 | 0.00640813 | 0.11489866 | 0.403758786 |
| YNL037C | 0.51009964 | 0.69983322 | 0.38241141 | 0.35657051 | 0.389597397 |
| YNL044W | 0.98021076 | 0.83559152 | 0.77066996 | 0.92012105 | 0.646687177 |
| YNL045W | 0.6073666  | 0.10187795 | 0.1979197  | 0.13975046 | 0           |

|         |            |            |            |            |             |
|---------|------------|------------|------------|------------|-------------|
| YNL049C | 0.95863235 | 0.94276407 | 0.93536061 | 0.95395344 | 1           |
| YNL055C | 0.98369372 | 0.97791413 | 0.99270572 | 0.87831693 | 0.964278322 |
| YNL064C | 0.98487203 | 0.77572461 | 0.81780873 | 0.73731857 | 0.768296931 |
| YNL067W | 0.82943913 | 0.93861263 | 0.92644206 | 0.73768468 | 0.754583213 |
| YNL069C | 0.89493915 | 0.92136933 | 0.91971912 | 0.6635607  | 0.678050049 |
| YNL071W | 0.94535522 | 0.82741877 | 0.95972685 | 0.87546764 | 0.943501584 |
| YNL085W | 0.2251687  | 0.1027679  | 0.65271424 | 0.72489965 | 0.759802002 |
| YNL088W | 0.9015809  | 0.87017859 | 0.92706778 | 0.87842108 | 0.766522424 |
| YNL096C | 0.84688843 | 0.85302776 | 0.85326445 | 0.69668799 | 0.737825658 |
| YNL104C | 0.12460964 | 0.14542034 | 0.04626263 | 0.08634011 | 0.513266539 |
| YNL110C | 1          | 0.93135977 | 0.80653056 | 0.79866774 | 0.762397786 |
| YNL112W | 0.57819224 | 0.92533307 | 0.86597614 | 0.72400956 | 0.623526806 |
| YNL113W | 1          | 0.84025232 | 0.75029363 | 0.79270258 | 0.844242059 |
| YNL117W | 0.21777336 | 0.16860195 | 0.10878538 | 0.07044702 | 0.128667618 |
| YNL118C | 1          | 0.76668511 | 0.74702904 | 0.93525417 | 1           |
| YNL121C | 0.99285456 | 0.88386811 | 0.85442272 | 0.87695259 | 0.989518924 |
| YNL132W | 0.96640089 | 0.98291493 | 0.99305965 | 0.94060326 | 0.890287569 |
| YNL134C | 0.0415766  | 0.07372955 | 0.00435121 | 0.02114662 | 0           |
| YNL135C | 0.15062239 | 0.13420088 | 0.059573   | 0.1324343  | 0.071470046 |
| YNL137C | 0.91008581 | 0.91782264 | 0.97654701 | 0.79815607 | 0.400419283 |
| YNL138W | 0.4404155  | 0.48950631 | 0.44974623 | 0.37120067 | 0.341928102 |
| YNL139C | 1          | 0.94185275 | 0.99353923 | 0.89581825 | 0.490165842 |
| YNL168C | 0.30305231 | 0.31261154 | 0.25278291 | 0          | 0.136369608 |
| YNL178W | 0.86620975 | 0.84052982 | 0.84594133 | 0.79048267 | 0.778887212 |
| YNL182C | 1          | 0.76160497 | 0.97022122 | 0.85555255 | 0.932073934 |
| YNL200C | 0.82502318 | 0.66690778 | 0.67943229 | 0.5253644  | 1           |
| YNL207W | 1          | 0.84853294 | 0.80198466 | 0.93828447 | 0.900263425 |

|         |            |            |            |            |             |
|---------|------------|------------|------------|------------|-------------|
| YNL209W | 0.69107376 | 0.30912926 | 0.41738685 | 0.56310884 | 0.676907177 |
| YNL220W | 0.05350336 | 0.0641798  | 0.03168804 | 0.08582765 | 0.098096156 |
| YNL232W | 0.4289218  | 0.49364479 | 0.57839576 | 0.49375648 | 0.422583344 |
| YNL239W | 0.40713411 | 0.44625279 | 0.34362217 | 0.32518884 | 0.166805034 |
| YNL241C | 0.0981468  | 0.127465   | 0.10778489 | 0.16078673 | 0.251828141 |
| YNL243W | 0.77770624 | 0.38641656 | 0.74980672 | 0.64951492 | 0.826321875 |
| YNL244C | 0.37489317 | 0.14222814 | 0.29172029 | 0.36928321 | 0.325909454 |
| YNL247W | 0.20791032 | 0.14281938 | 0.03873807 | 0.05454828 | 0.031911614 |
| YNL248C | 0.98996568 | 0.95256397 | 0.91167459 | 0.89003837 | 0.809285301 |
| YNL251C | 0.84540669 | 0          | 0.42083314 | 0.08530354 | 0.271151298 |
| YNL255C | 0          | 0.66023413 | 0.14827672 | 0.93206948 | 0.927836998 |
| YNL284C | 1          | 0.91086404 | 1          | 0.59882216 | 0.942175305 |
| YNL287W | 0.96122156 | 0.83813983 | 0.85430791 | 0.63654701 | 0.828056181 |
| YNL288W | 0.98006245 | 0.89035842 | 0.98485258 | 0.97468446 | 0.95413574  |
| YNL290W | 1          | 0.93230424 | 0.8967398  | 0.95436528 | 0.5         |
| YNL307C | 0.57685264 | 0.21383878 | 0.33021385 | 0.43477399 | 0.445296202 |
| YNL313C | 0.44082404 | 0.43688206 | 0          | 0.25461068 | 0.145093156 |
| YNL330C | 1          | 0.84501255 | 0.72391314 | 0.78512492 | 0.804566734 |
| YNL331C | 0.15875752 | 0.27119991 | 0.07701121 | 0.27727087 | 1           |
| YNR001C | 0.21580264 | 0.22346629 | 0.21855024 | 0.27479492 | 0.353665438 |
| YNR016C | 0.87082769 | 0.66176336 | 0.51422059 | 0.28052473 | 0.499380846 |
| YNR021W | 1          | 0.94716348 | 1          | 0.99230223 | 1           |
| YNR034W | 0.07328353 | 0.02919743 | 0          | 0          | 0.14243617  |
| YNR035C | 0.69160843 | 0.45256855 | 0.5505959  | 0.36608859 | 0.63489305  |
| YNR043W | 0.0801186  | 0.09296476 | 0.04883072 | 0.03441209 | 0.011798033 |
| YNR050C | 0.19225175 | 0.07912445 | 0.05981179 | 0.05109631 | 0.097056829 |
| YNR051C | 0.98548001 | 0.82726834 | 0.87028412 | 0.86644386 | 0.669256765 |

|         |            |            |            |            |             |
|---------|------------|------------|------------|------------|-------------|
| YNR053C | 0.83337468 | 0.94131789 | 0.96818987 | 0.9844954  | 0.945019244 |
| YOL004W | 0.89534497 | 0.95829315 | 0.91672703 | 0.68275699 | 0.550719319 |
| YOL012C | 0.89033803 | 0.93758726 | 0.83280721 | 0.48194208 | 0.482145633 |
| YOL038W | 0.33179649 | 0.45047509 | 0.29570928 | 0.22113195 | 0.264600254 |
| YOL039W | 0.86850353 | 0.82667019 | 0.82009521 | 0.77081752 | 0.656078274 |
| YOL040C | 0.87763497 | 0.95030285 | 0.81356557 | 0.66470677 | 0.591345571 |
| YOL041C | 1          | 0.96314232 | 0.90838889 | 0.86473962 | 0.819235148 |
| YOL049W | 0.08569132 | 0.08081993 | 0.01169952 | 0.02853613 | 0.081194127 |
| YOL057W | 0.09658968 | 0.05227922 | 0.01253715 | 0.08060161 | 0           |
| YOL058W | 0.08837242 | 0.10488249 | 0.02226772 | 0.04817172 | 0.100956988 |
| YOL061W | 0.93185714 | 0.71636513 | 0.51763128 | 0.66307508 | 0.591150127 |
| YOL064C | 0.03366271 | 0          | 0          | 0.00726617 | 0.036266945 |
| YOL076W | 0.97403206 | 0.91018725 | 0.98058658 | 0.91871046 | 0.967140296 |
| YOL077C | 0.94807933 | 0.89117206 | 0.93543164 | 0.87755265 | 0.864026587 |
| YOL086C | 0.44008324 | 0.37328889 | 0.25730905 | 0.33489981 | 0.525365085 |
| YOL097C | 0.09726701 | 0.09720617 | 0.20016987 | 0.15437948 | 0.246946087 |
| YOL111C | 0.84084912 | 0.94477845 | 0.81425477 | 0.63272482 | 0.734606819 |
| YOL127W | 0.86757294 | 0.92377592 | 0.85961735 | 0.78588048 | 0.736150131 |
| YOL139C | 0.58554257 | 0.29523324 | 0.43211076 | 0.52771266 | 0.532551975 |
| YOL145C | 0.79221716 | 0.49742146 | 0.7958556  | 0.71039247 | 0.700308328 |
| YOL147C | 0.9817966  | 0.96943739 | 1          | 0.93160272 | 0.948853417 |
| YOL151W | 0.03443293 | 0.0625212  | 0.00643967 | 0.05211228 | 0.038270532 |
| YOR007C | 0.37554829 | 0.17748559 | 0.10089338 | 0.21639083 | 0.104087099 |
| YOR014W | 1          | 0.96845294 | 0.85264897 | 0.6889686  | 1           |
| YOR020C | 0.42895943 | 0.24659895 | 0.24027106 | 0.17444902 | 0.112136031 |
| YOR021C | 0.09155679 | 0.08453536 | 0.01408383 | 0.09164071 | 0.034788074 |
| YOR027W | 0.03711807 | 0.06269242 | 0.05365604 | 0.09009543 | 0.055590313 |

|         |            |            |            |            |             |
|---------|------------|------------|------------|------------|-------------|
| YOR035C | 0.87889251 | 0.55321483 | 0.61961305 | 0.44054699 | 0.833399309 |
| YOR039W | 0.84658375 | 0.11546956 | 0.95918114 | 0.85831736 | 0.852066087 |
| YOR046C | 0.21403016 | 0.24484617 | 0.17315301 | 0.31217992 | 0.302132648 |
| YOR048C | 1          | 0.92408561 | 0.88101206 | 0.87175816 | 0.811883348 |
| YOR061W | 0.72790337 | 0.9467407  | 0.85299441 | 0.80824112 | 0.772478001 |
| YOR063W | 0.90014622 | 0.92991081 | 0.87726047 | 0.74097086 | 0.672065321 |
| YOR065W | 1          | 0.88245776 | 1          | 1          | 1           |
| YOR086C | 1          | 0.97398984 | 0.95702434 | 0.95119099 | 1           |
| YOR089C | 0.92444312 | 0.91159107 | 0.73094392 | 0.82819601 | 0.917117724 |
| YOR091W | 1          | 1          | 0.95167639 | 0.78483721 | 0.898621345 |
| YOR095C | 0.14538958 | 0.26362396 | 0.07417276 | 0.019775   | 0.124127412 |
| YOR096W | 0.80849666 | 0.86018885 | 0.83218955 | 0.69814996 | 0.676993032 |
| YOR099W | 1          | 1          | 0.98359234 | 0.99154305 | 1           |
| YOR109W | 0.12423999 | 0.20339785 | 0.03021001 | 0.54039542 | 0.354322221 |
| YOR116C | 0.94444154 | 0.96788669 | 0.97128517 | 0.91427555 | 0.928985531 |
| YOR117W | 0.85487484 | 0.79035959 | 0.82290604 | 0.75740371 | 0.819541676 |
| YOR120W | 0.00422673 | 0.01250776 | 0          | 0.04637092 | 0           |
| YOR122C | 0.0158827  | 0.07322056 | 0          | 0.05151147 | 0.007026026 |
| YOR128C | 0.18937687 | 0.17783041 | 0.07725128 | 0.183132   | 0.301958834 |
| YOR142W | 0.07264136 | 0.05835768 | 0.05853159 | 0.04793842 | 0.129797243 |
| YOR151C | 0.25231082 | 0.48395018 | 0.32499469 | 0.35711989 | 0.389536807 |
| YOR158W | 1          | 0.99400933 | 1          | 0.88464414 | 0.859998838 |
| YOR164C | 0.98245204 | 0.87265375 | 0.94302237 | 0.77624894 | 0.865056459 |
| YOR168W | 0.08159658 | 0.16494331 | 0.10523157 | 0.14863451 | 0.147753065 |
| YOR184W | 0.33215328 | 0.20959235 | 0.11862183 | 0.17871776 | 0.201910962 |
| YOR187W | 0.28407186 | 0.06600253 | 0.05439749 | 0.29378561 | 0.039758435 |
| YOR198C | 0.82612278 | 0.64566289 | 0.78076352 | 0.72511425 | 0.637939931 |

|           |            |            |            |            |             |
|-----------|------------|------------|------------|------------|-------------|
| YOR204W   | 0.91823079 | 0.91095897 | 0.84197763 | 0.75286028 | 0.696940691 |
| YOR206W   | 1          | 0.95127821 | 0.99190916 | 0.94970876 | 0.854107087 |
| YOR207C   | 1          | 0.93684548 | 0.93360961 | 0.90426378 | 0.762547724 |
| YOR209C   | 0.03815462 | 0.02832189 | 0          | 0.02528924 | 0.027286222 |
| YOR217W   | 0.93325748 | 0.95681297 | 0.94692468 | 0.84441629 | 0.547493788 |
| YOR230W   | 0.14015563 | 0.16241063 | 0.05207118 | 0.06772616 | 0.49900253  |
| YOR234C   | 0.83696051 | 0.91912077 | 0.86263556 | 0.70206631 | 0.664690858 |
| YOR259C   | 0.8837363  | 0.85779258 | 0.84186881 | 0.89209025 | 0.8690657   |
| YOR261C   | 0.76882717 | 0.49307455 | 0.75217666 | 0.46063607 | 0.650297212 |
| YOR270C   | 0.87450785 | 0.9421736  | 0.91117884 | 0.97723701 | 0.987875882 |
| YOR285W   | 0.16056747 | 0.09219685 | 0.04917034 | 0.06451629 | 1           |
| YOR298C-A | 0.98319839 | 0.44625496 | 0.63312093 | 0.8819891  | 0.540006283 |
| YOR310C   | 0.93302808 | 0.89528423 | 0.91331287 | 0.86896621 | 0.893687167 |
| YOR317W   | 0.98377718 | 0.93960107 | 0.9792624  | 0.92780148 | 0.956430445 |
| YOR323C   | 0.08217558 | 0.19949789 | 0.00548079 | 0.09762848 | 0.018794131 |
| YOR326W   | 1          | 0.86701267 | 1          | 0.82058913 | 0.719310935 |
| YOR332W   | 0.56693107 | 0.42464469 | 0.26239014 | 0.38451279 | 0.257395133 |
| YOR335C   | 0.47754398 | 0.22731194 | 0.0808847  | 0.20246686 | 0.361306089 |
| YOR341W   | 0.96687123 | 0.83073477 | 0.83479248 | 0.77250763 | 0.801880984 |
| YOR361C   | 0.93506993 | 0.81000153 | 0.90735081 | 0.82392274 | 0.79793206  |
| YOR362C   | 0.29321436 | 0.4300355  | 0.33946202 | 0.30651549 | 0.264348227 |
| YOR369C   | 0.35268801 | 0.29508185 | 0.35647051 | 0.42751688 | 0.435724079 |
| YOR374W   | 0.22150789 | 0.2646653  | 0.19312336 | 0.19930072 | 0.269287186 |
| YOR375C   | 0.07335442 | 0.26188825 | 0.06307823 | 0.11248056 | 0.151367635 |
| YPL004C   | 0.72958701 | 0.41822827 | 0.30764979 | 0.2176709  | 0.350333326 |
| YPL012W   | 1          | 1          | 0.98885063 | 0.94802319 | 0.989128441 |
| YPL028W   | 0.08405093 | 0.15860348 | 0.05495846 | 0.08736929 | 0.12059433  |



|         |            |            |            |            |             |
|---------|------------|------------|------------|------------|-------------|
| YPL032C | 0.96107169 | 0.83512212 | 0.93239904 | 1          | 0.799215836 |
| YPL043W | 0.77452759 | 0.82444435 | 0.79569224 | 0.79952698 | 0.683234899 |
| YPL048W | 0.3247588  | 0.37229613 | 0.31926078 | 0.38204907 | 0.282010907 |
| YPL050C | 1          | 0.91858335 | 1          | 0.98912597 | 1           |
| YPL061W | 0.14720455 | 0.13718295 | 0.06627886 | 0.13870041 | 0.163292111 |
| YPL078C | 0.95226892 | 0.90709378 | 0.98097797 | 1          | 1           |
| YPL084W | 0.87604572 | 0.75705016 | 0.63783583 | 0.60637863 | 0.709457652 |
| YPL085W | 1          | 1          | 1          | 0.83644446 | 1           |
| YPL086C | 0.9760164  | 0.90725107 | 0.91847335 | 0.91149294 | 0.844425867 |
| YPL091W | 0.20298884 | 0.23864555 | 0.09994747 | 0.13109106 | 0.06910304  |
| YPL093W | 0.95965751 | 0.93872368 | 0.97259199 | 0.94589129 | 0.852459131 |
| YPL106C | 0.316185   | 0.14730755 | 0.09771759 | 0.15724811 | 0.142484793 |
| YPL111W | 0.29762672 | 0.26402791 | 0.11402736 | 0.07578434 | 0.153538267 |
| YPL112C | 0.1315247  | 0.13760862 | 0.06591215 | 0.05321815 | 0.259879841 |
| YPL117C | 0.05481252 | 0.03951504 | 0.01935885 | 0.07069113 | 0.153146214 |
| YPL119C | 0.94923274 | 0.91941555 | 0.94208287 | 0.71904803 | 1           |
| YPL120W | 0.81723473 | 0.84667329 | 0.87559708 | 0.75479957 | 0.758662134 |
| YPL125W | 0.9623593  | 0.92705228 | 0.81791188 | 0.81548382 | 1           |
| YPL127C | 0.84107181 | 0.9220543  | 0.92728053 | 0.72924007 | 0.715619863 |
| YPL128C | 1          | 0.82120284 | 0.87340337 | 0.89593472 | 0.893853433 |
| YPL129W | 0.90237649 | 0.67080909 | 0.40932169 | 0.67113238 | 0.860622787 |
| YPL131W | 0.78152731 | 0.83617071 | 0.63636598 | 0.56023173 | 0.50321454  |
| YPL143W | 0.83159985 | 0.90185092 | 0.8583609  | 0.62993535 | 0.683004746 |
| YPL154C | 0.31099984 | 0.28067254 | 0.2908434  | 0.42992461 | 0.775158551 |
| YPL160W | 0.05666051 | 0.12160303 | 0.10726666 | 0.24133763 | 0.199464735 |
| YPL169C | 0.94223689 | 0.92306001 | 0.91376018 | 0.68560131 | 0.688140427 |
| YPL190C | 0.40595709 | 0.24099611 | 0.30178915 | 0.32595511 | 0.296320569 |

|           |            |            |            |            |             |
|-----------|------------|------------|------------|------------|-------------|
| YPL195W   | 0.96871454 | 0.86044482 | 0.89576896 | 1          | 0.931316653 |
| YPL198W   | 0.97564124 | 0.99152299 | 0.97081074 | 0.85944709 | 0.601954153 |
| YPL203W   | 0.14147125 | 0.1220192  | 0.01480757 | 0.12523622 | 0.324782119 |
| YPL204W   | 1          | 1          | 1          | 1          | 0.910658611 |
| YPL210C   | 1          | 0.97286441 | 0.8037105  | 0.48044841 | 0.57085489  |
| YPL211W   | 1          | 0.95843754 | 0.85221501 | 0.96354436 | 0.607430965 |
| YPL218W   | 1          | 0.89778481 | 0.76440226 | 0.66999251 | 0.711452853 |
| YPL225W   | 0.4144152  | 0.22340236 | 0.18114324 | 0.24664787 | 0.409446256 |
| YPL226W   | 0.93471588 | 0.69613798 | 0.78483776 | 0.84438295 | 0.822653662 |
| YPL231W   | 0.73286441 | 0.54328005 | 0.77170696 | 0.78327986 | 0.62517237  |
| YPL235W   | 0.84491556 | 0.88235895 | 0.71271698 | 0.53307448 | 0.718222753 |
| YPL237W   | 0.98480459 | 0.86139658 | 0.91042588 | 0.83737763 | 0.649961789 |
| YPL240C   | 0.42999534 | 0.14508874 | 0.14501743 | 0.11460366 | 0.282257146 |
| YPL243W   | 0.98148527 | 0.89131914 | 0.7534977  | 0.31916881 | 0.777571974 |
| YPL249C-A | 0.86051014 | 0.91208175 | 0.84715868 | 0.7031316  | 0.563248068 |
| YPL260W   | 0.09308634 | 0.03200042 | 0.03794854 | 0.00568678 | 0.068616202 |
| YPL262W   | 0.06232162 | 0.07201281 | 0.01913369 | 0.01827002 | 0.026577135 |
| YPR010C   | 0.90993305 | 0.82796926 | 0.86464484 | 0.82782175 | 0.822277502 |
| YPR034W   | 0.87197632 | 0.75828322 | 0.81296329 | 1          | 0.83267904  |
| YPR035W   | 0.47818092 | 0.50369213 | 0.35249327 | 0.16254496 | 0.180246767 |
| YPR036W   | 0.87217706 | 0.63149671 | 0.51623351 | 0.3045428  | 0.611952513 |
| YPR041W   | 0.378658   | 0.35839752 | 0.53275127 | 0.64244722 | 0.697911626 |
| YPR069C   | 0.06986233 | 0.02472381 | 0.00404129 | 0.06233748 | 0.056231134 |
| YPR074C   | 0.04366419 | 0.07493752 | 0.02277663 | 0.0671611  | 0.085958245 |
| YPR103W   | 0.27092379 | 0.15288713 | 0.12168943 | 0.31607996 | 0.651155449 |
| YPR108W   | 0.88553737 | 0.66046168 | 0.5920964  | 0.52198732 | 0.886567096 |
| YPR110C   | 0.7486533  | 0.79214331 | 0.79872356 | 0.71625032 | 0.827233837 |

|         |            |            |            |            |             |
|---------|------------|------------|------------|------------|-------------|
| YPR127W | 0.06659295 | 0.09025964 | 0.0090648  | 0.03061548 | 0.333180652 |
| YPR145W | 0          | 0.25144294 | 0.0028097  | 0.02287835 | 0.031572025 |
| YPR149W | 0.93236717 | 0.91120273 | 0.97931327 | 0.95279964 | 1           |
| YPR160W | 0.50604561 | 0.34065821 | 0.0830964  | 0.11518094 | 0.33964476  |
| YPR163C | 0.09330474 | 0.15358073 | 0.07862925 | 0.10864224 | 0.108473372 |
| YPR165W | 1          | 0.94852901 | 0.81645112 | 0.98423074 | 0.960616669 |
| YPR181C | 0.3642556  | 0.36582825 | 0.44090103 | 0.53476306 | 0.581351248 |
| YPR183W | 1          | 0.89349427 | 0.99210167 | 0.97948896 | 0.973908862 |
| YPR184W | 0.2570253  | 0.30328907 | 0.17423076 | 0.02959258 | 0.689310132 |
| YPR189W | 1          | 0.97283761 | 0.86249065 | 0.92157417 | 0.876109358 |
| YPR191W | 0.73077152 | 0.58034569 | 0.5539562  | 0.42351289 | 0.545502388 |
